# Supplementary material for: Facile and Promising Method for Michael Addition of Indole and Pyrrole to Electron-Deficienttrans-β-Nitroolefins Catalyzed by a Hydrogen Bond Donor Catalyst Feist’s Acid and Preliminary Study of Antimicrobial Activity
Source: Hindawi journal article supplement (doi:10.1155/2014/649197), 2014-01-01

## Facile and promising method for Michael addition of indole and pyrrole to electron deficient trans- $\beta$ -nitroolefins catalyzed by a hydrogen bond donor catalyst Feist's acid; and Preliminary study of anti-microbial activity

A. M. A. Al Majid, M. S. Islam\*, A. Barakat, M. H.M. Al-Agamy, Mu.Naushad

Department of Chemistry, Faculty of Science, King Saud University, P.O. Box 2455, Riyadh 11451, Saudi Arabia

### List of content:

|                                                                                                                                            |        |
|--------------------------------------------------------------------------------------------------------------------------------------------|--------|
| Experimentals: General, Materials, Instrumentation.....                                                                                    | 1      |
| Scan copies of $^1\text{H}$ and $^{13}\text{C}$ spectra of the Michael adducts <b>7a-i</b> , <b>8a-I</b> , <b>9a-d</b> , & <b>9h</b> ..... | 2 - 47 |

### Generals:

Glassware was oven-dried overnight at 120 °C before use. Reactions were performed under an inert atmosphere using an argon filled glove box and standard Schlenk-line techniques. All the reactions were monitored by TLC analysis using Merck Silica Gel 60 F-254 thin layer plates. Column chromatography was performed on silica gel 100-200 mesh. **Materials:** Petroleum ether (PE), hexane and ethyl acetate for column chromatography were distilled prior to use.  $\text{CH}_2\text{Cl}_2$ , EtOH were distilled from  $\text{P}_2\text{O}_5$  and Mg respectively and stored on 4Å molecular sieves. Tetrahydrofuran, benzene, toluene were distilled from sodium benzophenone ketyl. Acetonitrile and dimethylformamide were dried by distillation over calcium hydride. Nitroolefins **2a – i** were prepared according to procedures reported in literature.<sup>1</sup> **Instrumentation:** NMR spectra were recorded with a Jeol spectrometer at 400 MHz ( $^1\text{H}$ -NMR) and 100 MHz ( $^{13}\text{C}$ -NMR.). The chemical shifts ( $\delta$  in ppm) were reported down field from tetramethylsilane (TMS,  $\delta$  scale) with the deuterated solvent resonance referenced as internal standard. Elemental analyses were performed on a Perkin Elmer 2400 Elemental Analyzer. IR spectra were obtained using FTIR-800 Model. Mass spectrometric analysis was conducted by using ESI mode on AGILENT Technologies 6410-triple quad LC/MS instrument.

### Reference:

1. N. A. Lange and W. E. Hamburger, "Condensation of aromatic aldehydes with nitromethane in the presence of alcoholic sodium hydroxide," *Journal of the American Chemical Society*, vol. 53, no. 10, pp. 3865–3867, 1931.

Compound 7a: <sup>1</sup>H-NMR

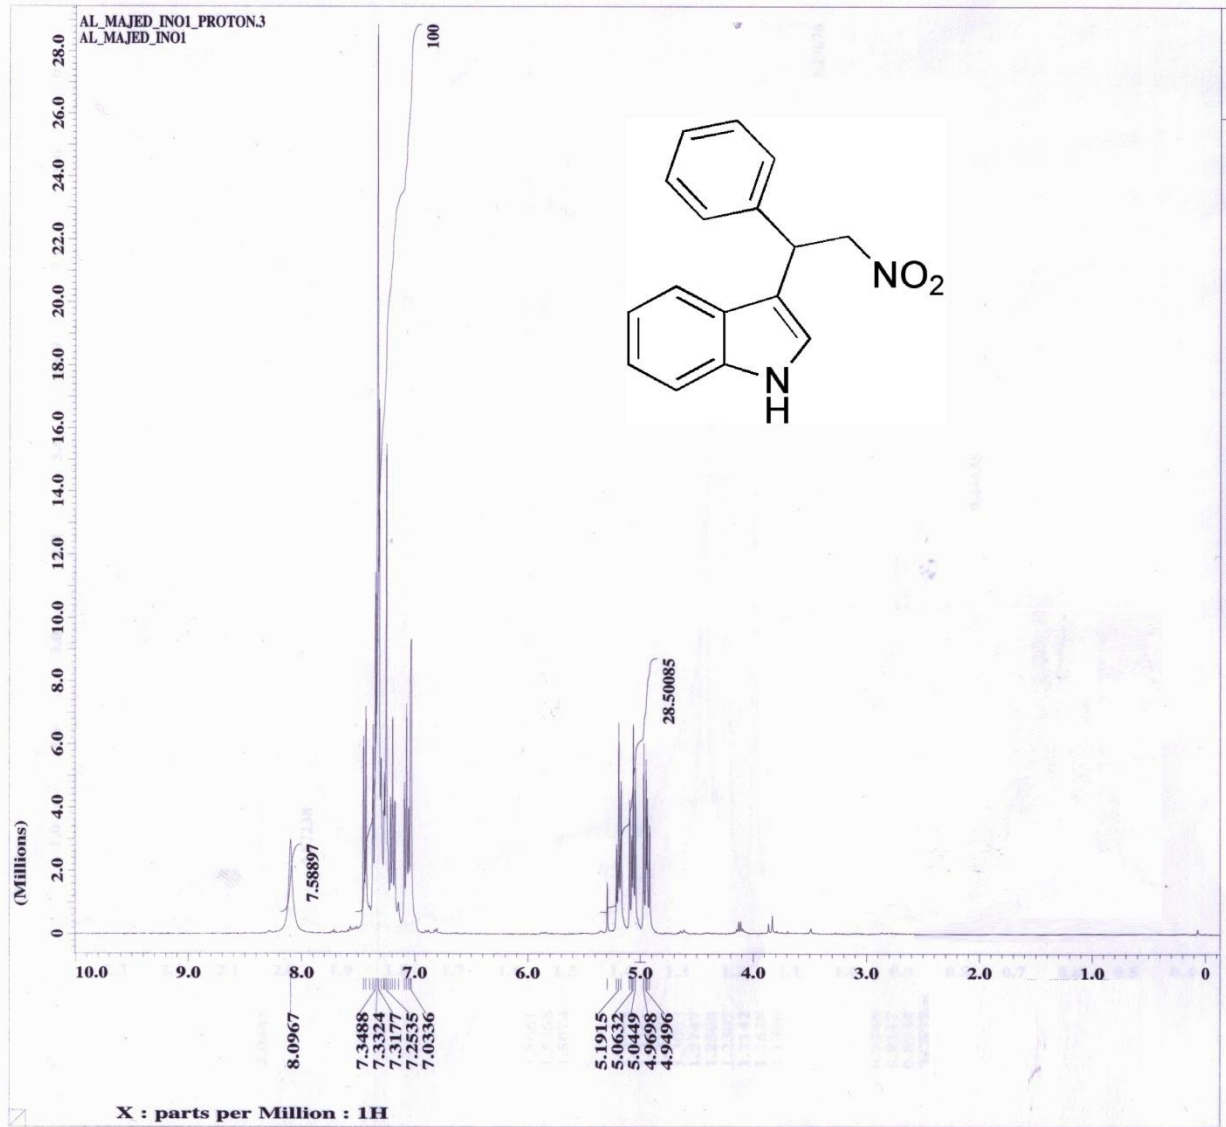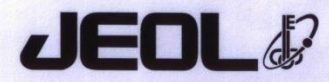

---- ACQUISITION PARAMETERS ----  
 File Name = AL\_MAJED\_INO1\_PROTON.3  
 Author = DR. M. MARASHDAH  
 Sample ID = AL\_MAJED\_INO1  
 Content = AL\_MAJED\_INO1  
 Creation Date = 23-DEC-2012 09:44:51  
 Revision Date = 23-DEC-2012 10:23:11  
 Spec Site = ECP400  
 Spec Type = DELTA\_NMR  
 Data Format = ID\_COMPLEX  
 Dimensions = X  
 Dim Title = 1H  
 Dim Size = 16384  
 Dim Units = [ppm]  
 Experiment = single\_pulse.exp  
 Field\_strength = 9.389766 [T]  
 X\_domain = 1H  
 X\_freq = 399.7841973 [MHz]  
 X\_offset = 5 [ppm]  
 X\_sweep = 12.00480192 [kHz]  
 X\_points = 16384  
 X\_resolution = 0.73275969 [Hz]  
 Recvr\_gain = 19  
 Filter\_mode = BUTTERWORTH  
 X\_prescans = 0  
 Scans = 8  
 Irr\_noise = WALTZ  
 Irr\_pwidth = 50 [us]  
 Relaxation\_delay = 4 [s]  
 Solvent = CHLOROFORM-D  
 Temp\_get = 21.3 [dC]  
 Spin\_get = 15 [Hz]  
 Probe\_id = 2564

Compound 7a: <sup>13</sup>C-NMR

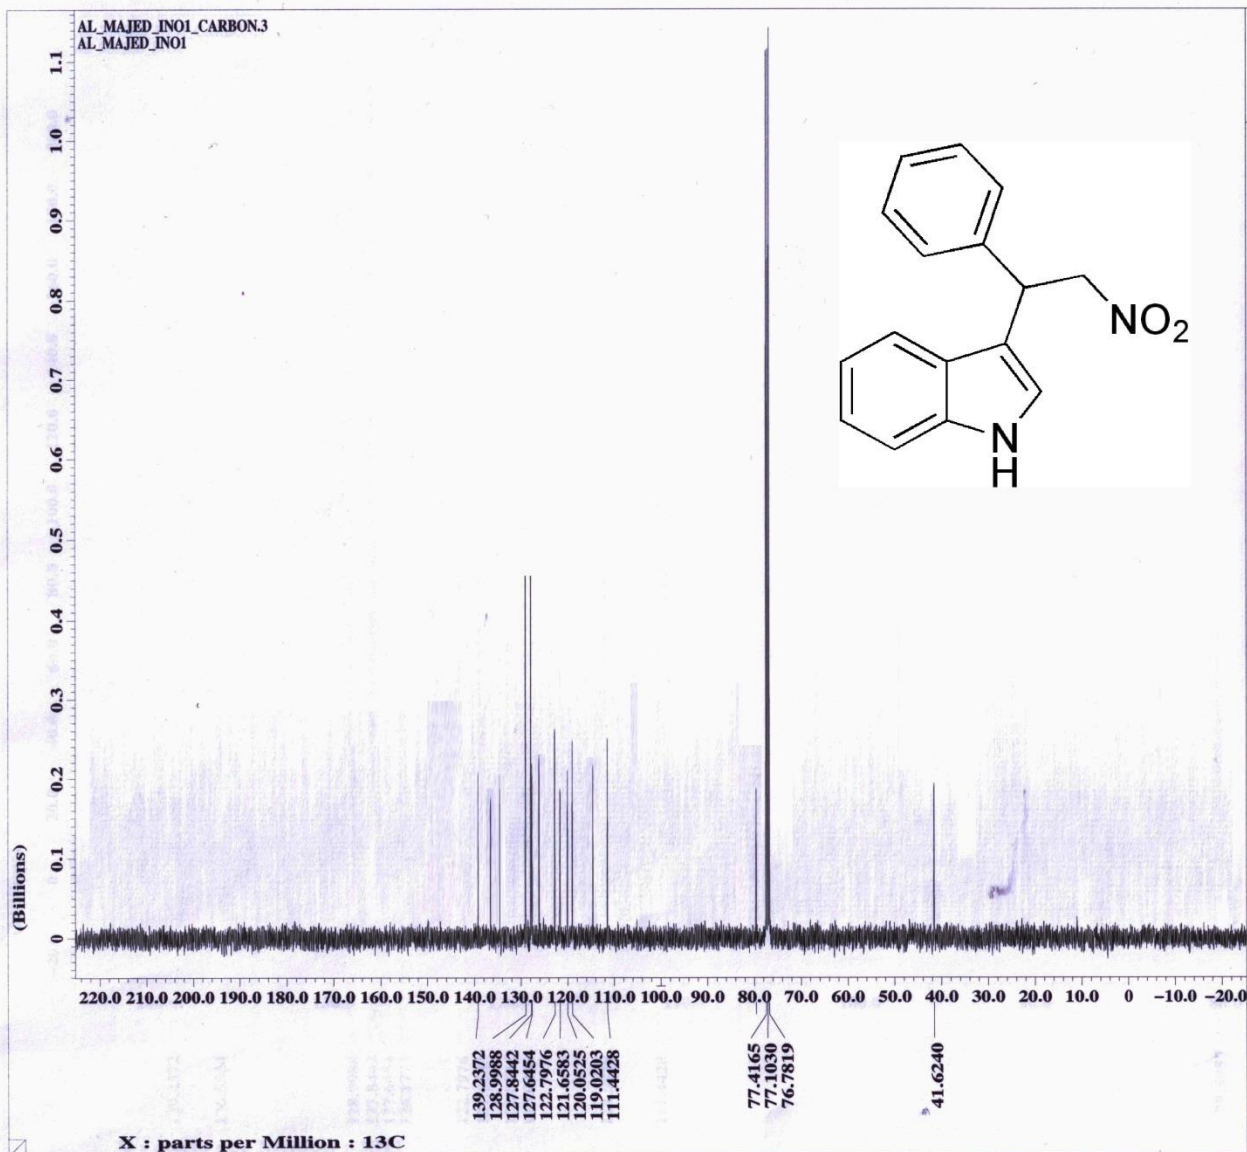

**JEOL**

---- ACQUISITION PARAMETERS ----  
 File Name = AL\_MAJED\_INO1\_CARBON.3  
 Author = DR. M. MARASHDAH  
 Sample ID = AL\_MAJED\_INO1  
 Content = AL\_MAJED\_INO1  
 Creation Date = 23-DEC-2012 09:57:33  
 Revision Date = 23-DEC-2012 10:29:29  
 Spec Site = ECP400  
 Spec Type = DELTA\_NMR  
 Data Format = 1D\_COMPLEX  
 Dimensions = X  
 Dim Title = 13C  
 Dim Size = 32768  
 Dim Units = [ppm]  
 Experiment = single\_pulse\_dec  
 Field\_strength = 9.389766[T]  
 X\_domain = 13C  
 X\_freq = 100.53535686[MHz]  
 X\_offset = 100[ppm]  
 X\_sweep = 25.18891688[kHz]  
 X\_points = 32768  
 X\_resolution = 0.7687282[Hz]  
 Recvr\_gain = 29  
 Filter\_mode = BUTTERWORTH  
 X\_prescans = 4  
 Scans = 300  
 Irr\_domain = 1H  
 Irr\_offset = 5.0[ppm]  
 Irr\_noise = WALTZ  
 Irr\_pwidth = 50[us]  
 Relaxation\_delay = 1[s]  
 Solvent = CHLOROFORM-D  
 Temp\_get = 22.2[dc]  
 Spin\_get = 14[Hz]  
 Probe\_id = 2564

Compound 7b: <sup>1</sup>H-NMR

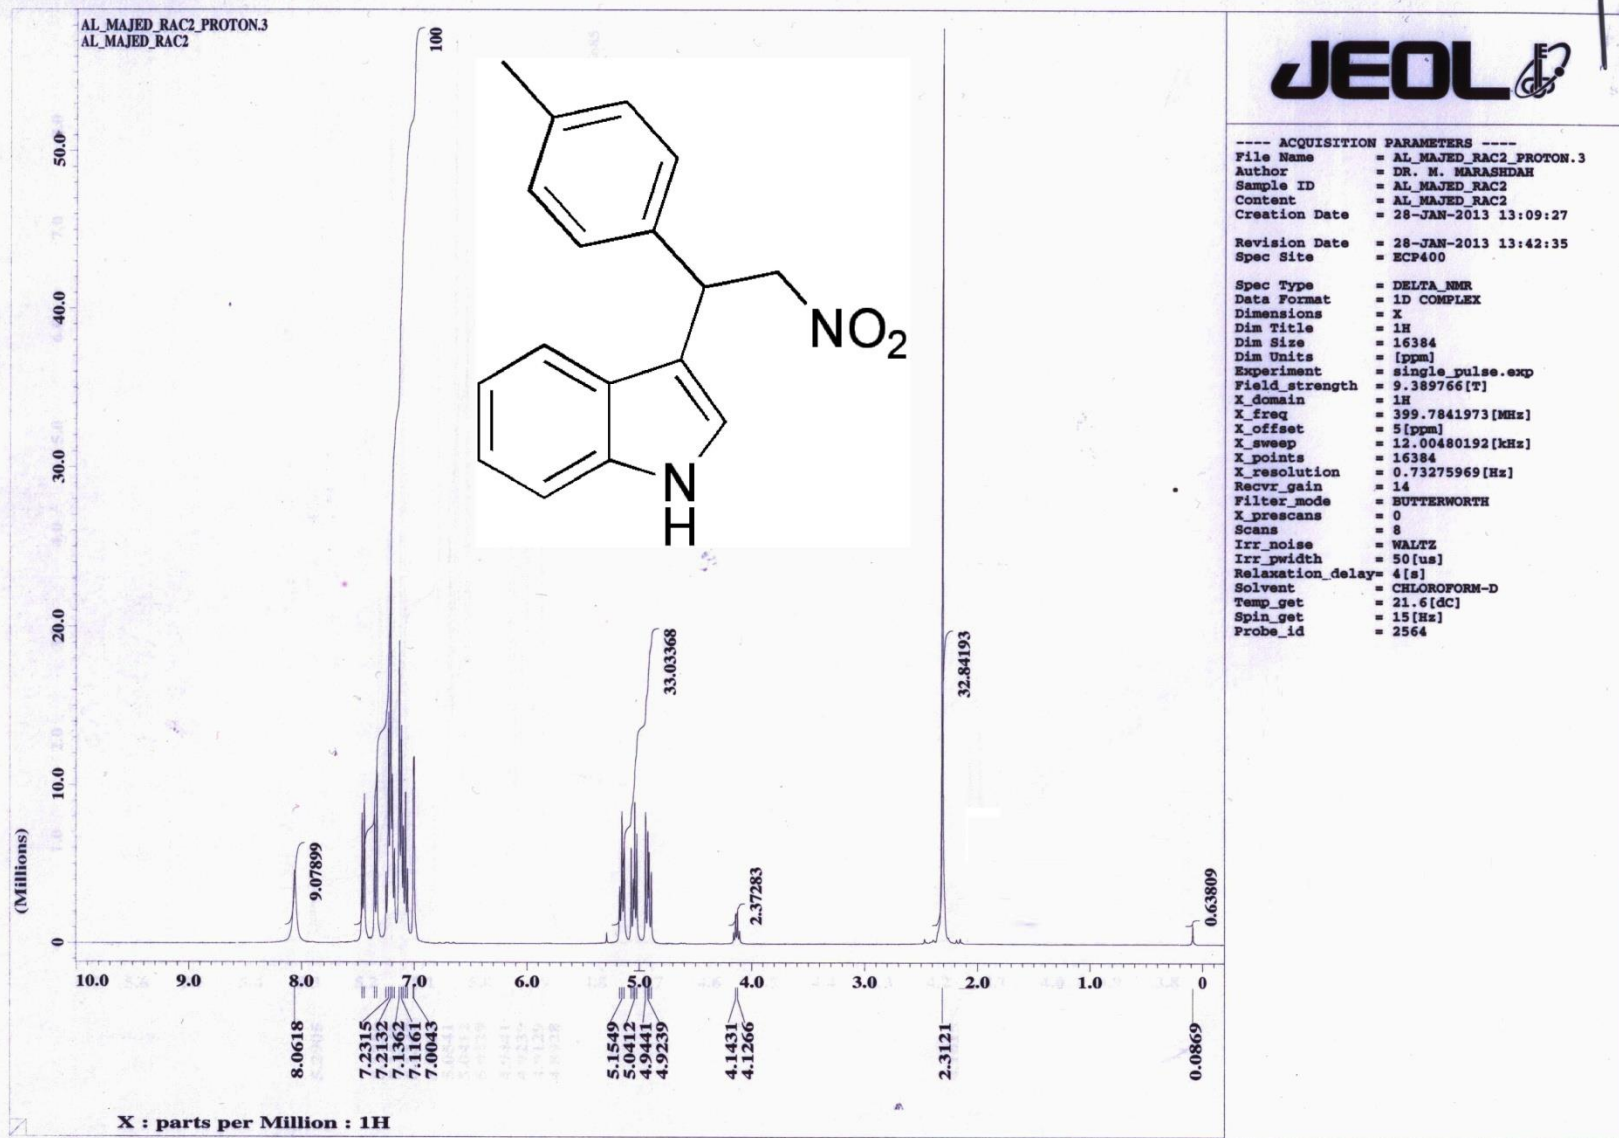

Compound 7b: <sup>13</sup>C-NMR

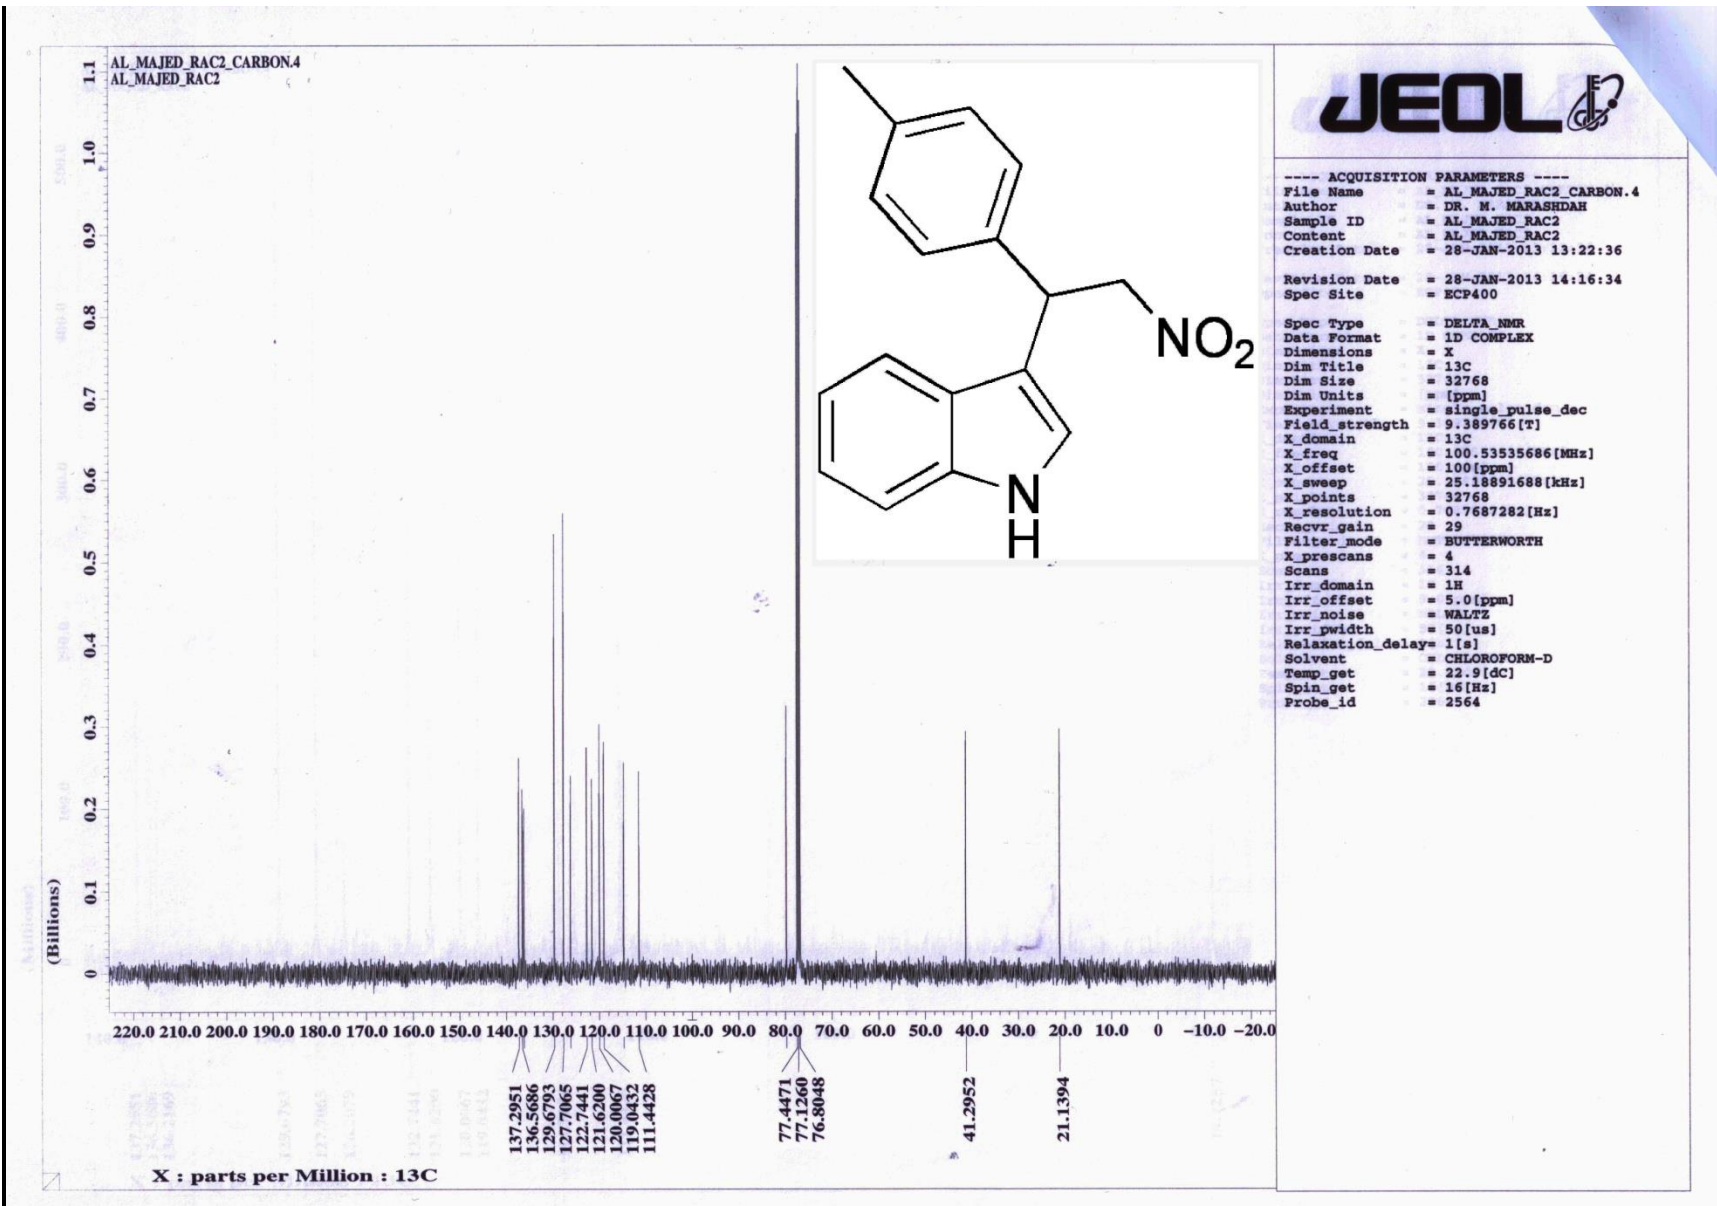

Compound 7c: <sup>1</sup>H-NMR

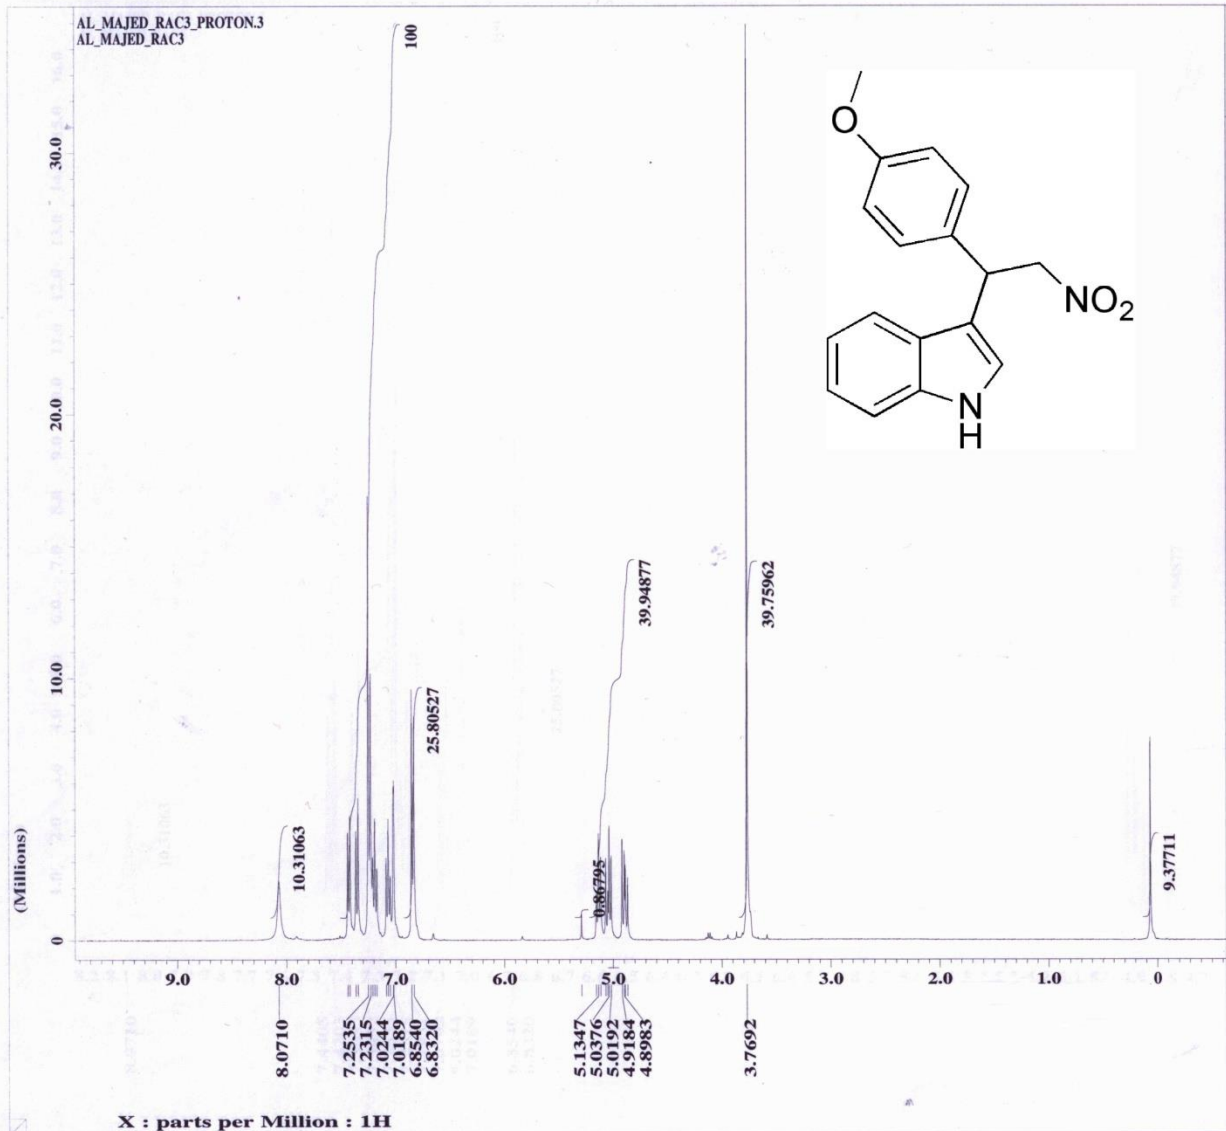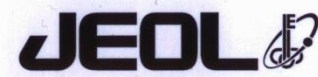

---- ACQUISITION PARAMETERS ----  
 File Name = AL\_MAJED\_RAC3\_PROTON.3  
 Author = DR. M. MARASHDAH  
 Sample ID = AL\_MAJED\_RAC3  
 Content = AL\_MAJED\_RAC3  
 Creation Date = 28-JAN-2013 13:28:50  
 Revision Date = 28-JAN-2013 14:19:01  
 Spec Site = ECP400  
 Spec Type = DELTA\_NMR  
 Data Format = 1D\_COMPLEX  
 Dimensions = X  
 Dim Title = 1H  
 Dim Size = 16384  
 Dim Units = [ppm]  
 Experiment = single\_pulse.exp  
 Field\_strength = 9.389766[T]  
 X\_domain = 1H  
 X\_freq = 399.7841973 [MHz]  
 X\_offset = 5 [ppm]  
 X\_sweep = 12.00480192 [kHz]  
 X\_points = 16384  
 X\_resolution = 0.73275969 [Hz]  
 Recvr\_gain = 17  
 Filter\_mode = BUTTERWORTH  
 X\_prescans = 0  
 Scans = 8  
 Irr\_noise = WALTZ  
 Irr\_pwidth = 50 [us]  
 Relaxation\_delay = 4 [s]  
 Solvent = CHLOROFORM-D  
 Temp\_get = 21.8 [dC]  
 Spin\_get = 15 [Hz]  
 Probe\_id = 2564

Compound 7c: <sup>13</sup>C-NMR

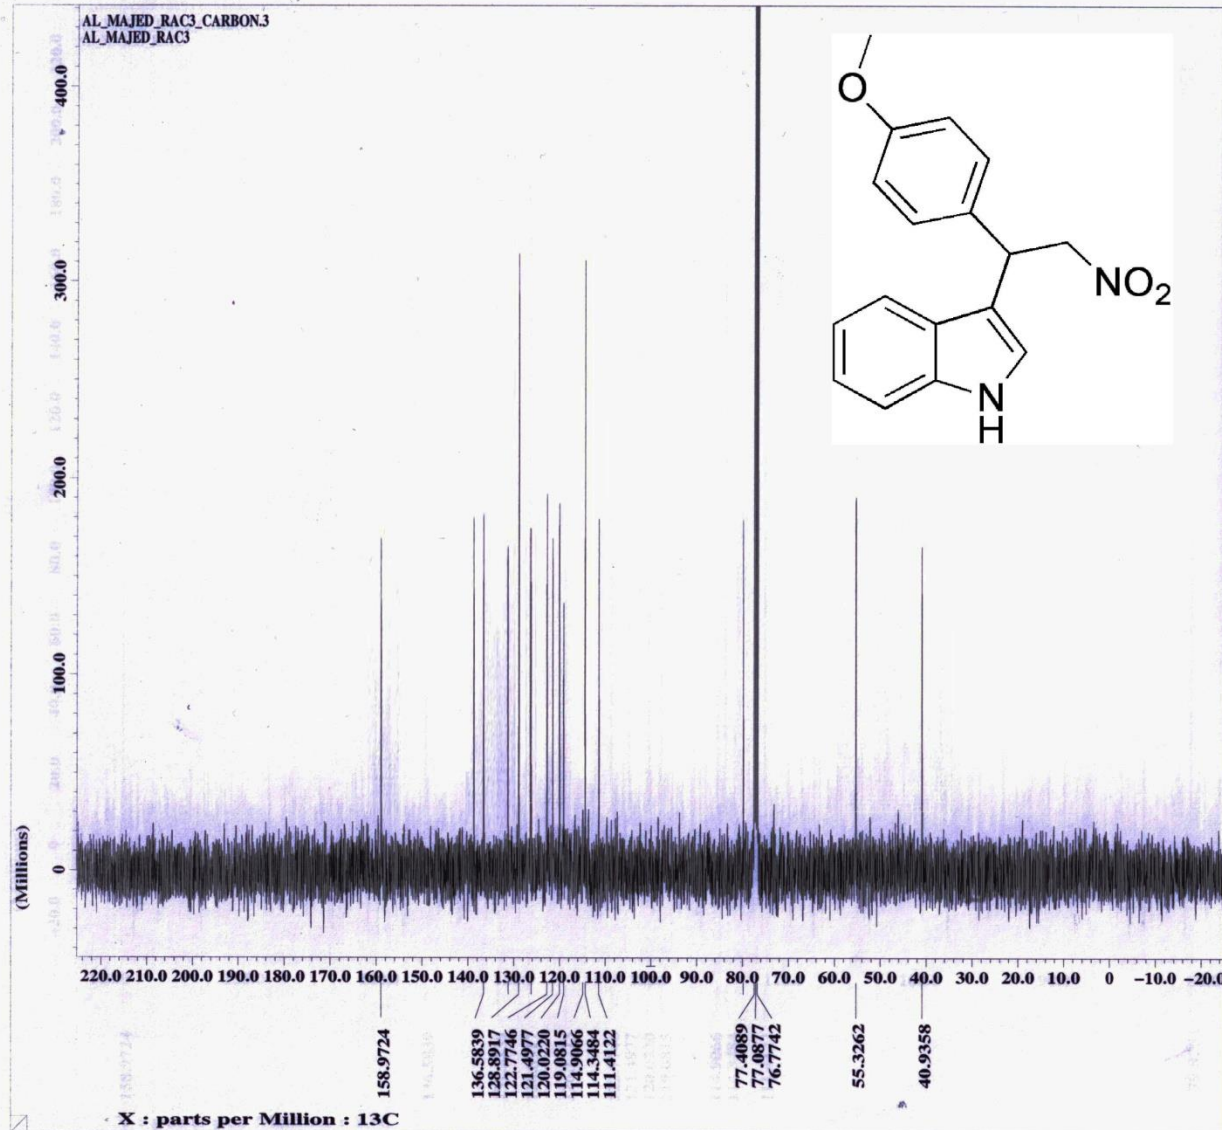

**JEOL**

----- ACQUISITION PARAMETERS -----  
 File Name = AL\_MAJED\_RAC3\_CARBON.3  
 Author = DR. M. MARASHDAH  
 Sample ID = AL\_MAJED\_RAC3  
 Content = AL\_MAJED\_RAC3  
 Creation Date = 28-JAN-2013 13:51:17  
 Revision Date = 28-JAN-2013 14:24:18  
 Spec Site = ECP400  
 Spec Type = DELTA\_NMR  
 Data Format = 1D\_COMPLEX  
 Dimensions = X  
 Dim Title = 13C  
 Dim Size = 32768  
 Dim Units = [ppm]  
 Experiment = single\_pulse\_dec  
 Field\_strength = 9.389766 [T]  
 X\_domain = 13C  
 X\_freq = 100.53535686 [MHz]  
 X\_offset = 100 [ppm]  
 X\_sweep = 25.18891688 [kHz]  
 X\_points = 32768  
 X\_resolution = 0.7687282 [Hz]  
 Recvr\_gain = 29  
 Filter\_mode = BUTTERWORTH  
 X\_prescans = 4  
 Scans = 555  
 Irr\_domain = 1H  
 Irr\_offset = 5.0 [ppm]  
 Irr\_noise = WALTZ  
 Irr\_pwidth = 50 [us]  
 Relaxation\_delay = 1 [s]  
 Solvent = CHLOROFORM-D  
 Temp\_get = 23 [dC]  
 Spin\_get = 16 [Hz]  
 Probe\_id = 2564

Compound 7d: <sup>1</sup>H-NMR

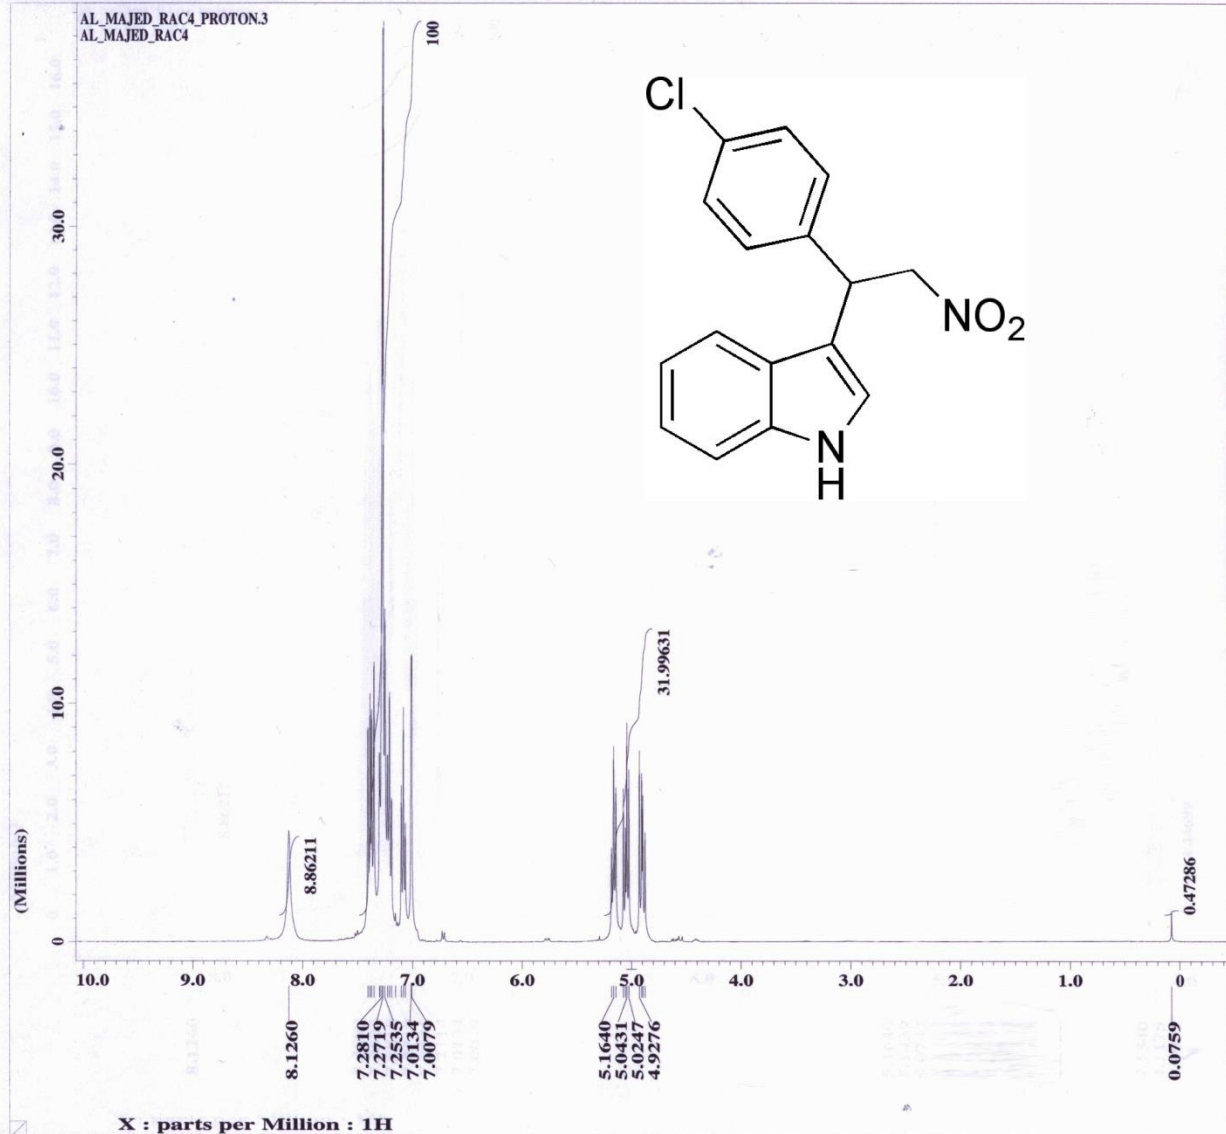

**JEOL**

----- ACQUISITION PARAMETERS -----  
 File Name = AL\_MAJED\_RAC4\_PROTON.3  
 Author = DR. M. MARASHDAH  
 Sample ID = AL\_MAJED\_RAC4  
 Content = AL\_MAJED\_RAC4  
 Creation Date = 29-JAN-2013 09:28:20  
 Revision Date = 29-JAN-2013 13:39:53  
 Spec Site = ECP400  
 Spec Type = DELTA\_NMR  
 Data Format = 1D\_COMPLEX  
 Dimensions = X  
 Dim Title = 1H  
 Dim Size = 16384  
 Dim Units = [ppm]  
 Experiment = single\_pulse.exp  
 Field\_strength = 9.389766[T]  
 X\_domain = 1H  
 X\_freq = 399.7841973[MHz]  
 X\_offset = 5[ppm]  
 X\_sweep = 12.00480192[kHz]  
 X\_points = 16384  
 X\_resolution = 0.73275969[Hz]  
 Recvr\_gain = 17  
 Filter\_mode = BUTTERWORTH  
 X\_prescans = 0  
 Scans = 8  
 Irr\_noise = WALTZ  
 Irr\_width = 50[us]  
 Relaxation\_delay = 4[s]  
 Solvent = CHLOROFORM-D  
 Temp\_get = 20.8[dc]  
 Spin\_get = 16[Hz]  
 Probe\_id = 2564



Compound 7d: <sup>13</sup>C-NMR

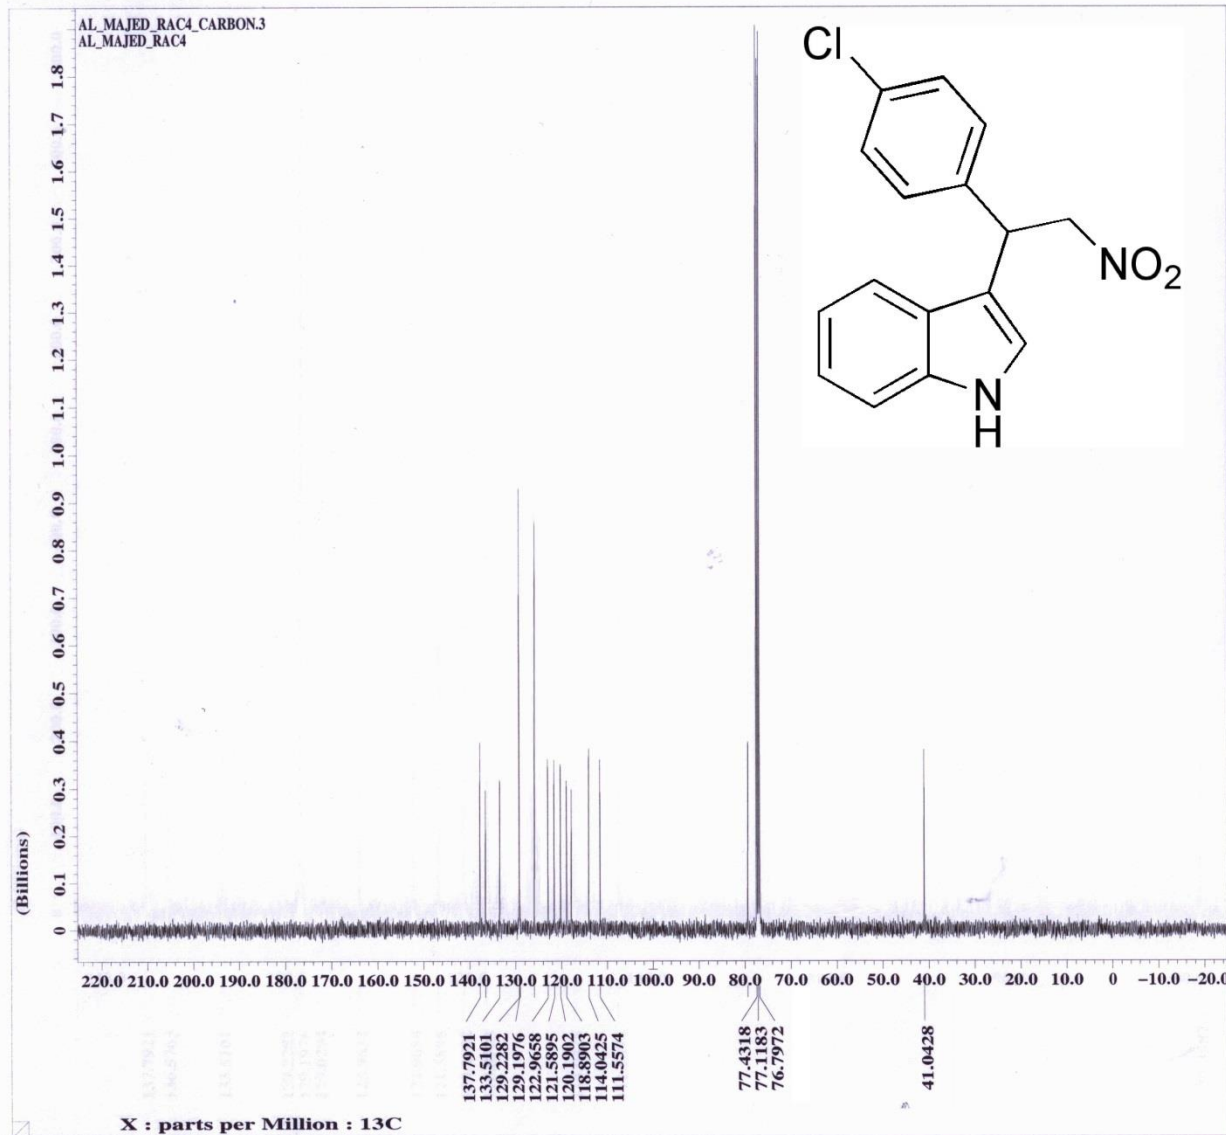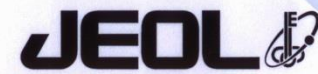

---- ACQUISITION PARAMETERS ----

File Name = AL\_MAJED\_RAC4\_CARBON.3  
 Author = DR. M. MARASHDAH  
 Sample ID = AL\_MAJED\_RAC4  
 Content = AL\_MAJED\_RAC4  
 Creation Date = 29-JAN-2013 10:00:14  
 Revision Date = 29-JAN-2013 13:41:16  
 Spec Site = ECP400

Spec Type = DELTA\_NMR  
 Data Format = 1D\_COMPLEX  
 Dimensions = X  
 Dim Title = 13C  
 Dim Size = 32768  
 Dim Units = [ppm]  
 Experiment = single\_pulse\_dec  
 Field\_strength = 9.389766[T]  
 X\_domain = 13C  
 X\_freq = 100.53535686[MHz]  
 X\_offset = 100[ppm]  
 X\_sweep = 25.18891688[kHz]  
 X\_points = 32768  
 X\_resolution = 0.7687282[Hz]  
 Recvr\_gain = 28  
 Filter\_mode = BUTTERWORTH  
 X\_prescans = 4  
 Scans = 800  
 Irr\_domain = 1H  
 Irr\_offset = 5.0[ppm]  
 Irr\_noise = WALTZ  
 Irr\_pwidth = 50[us]  
 Relaxation\_delay = 1[s]  
 Solvent = CHLOROFORM-D  
 Temp\_get = 22.1[dC]  
 Spin\_get = 16[Hz]  
 Probe\_id = 2564

Compound 7e: <sup>1</sup>H-NMR

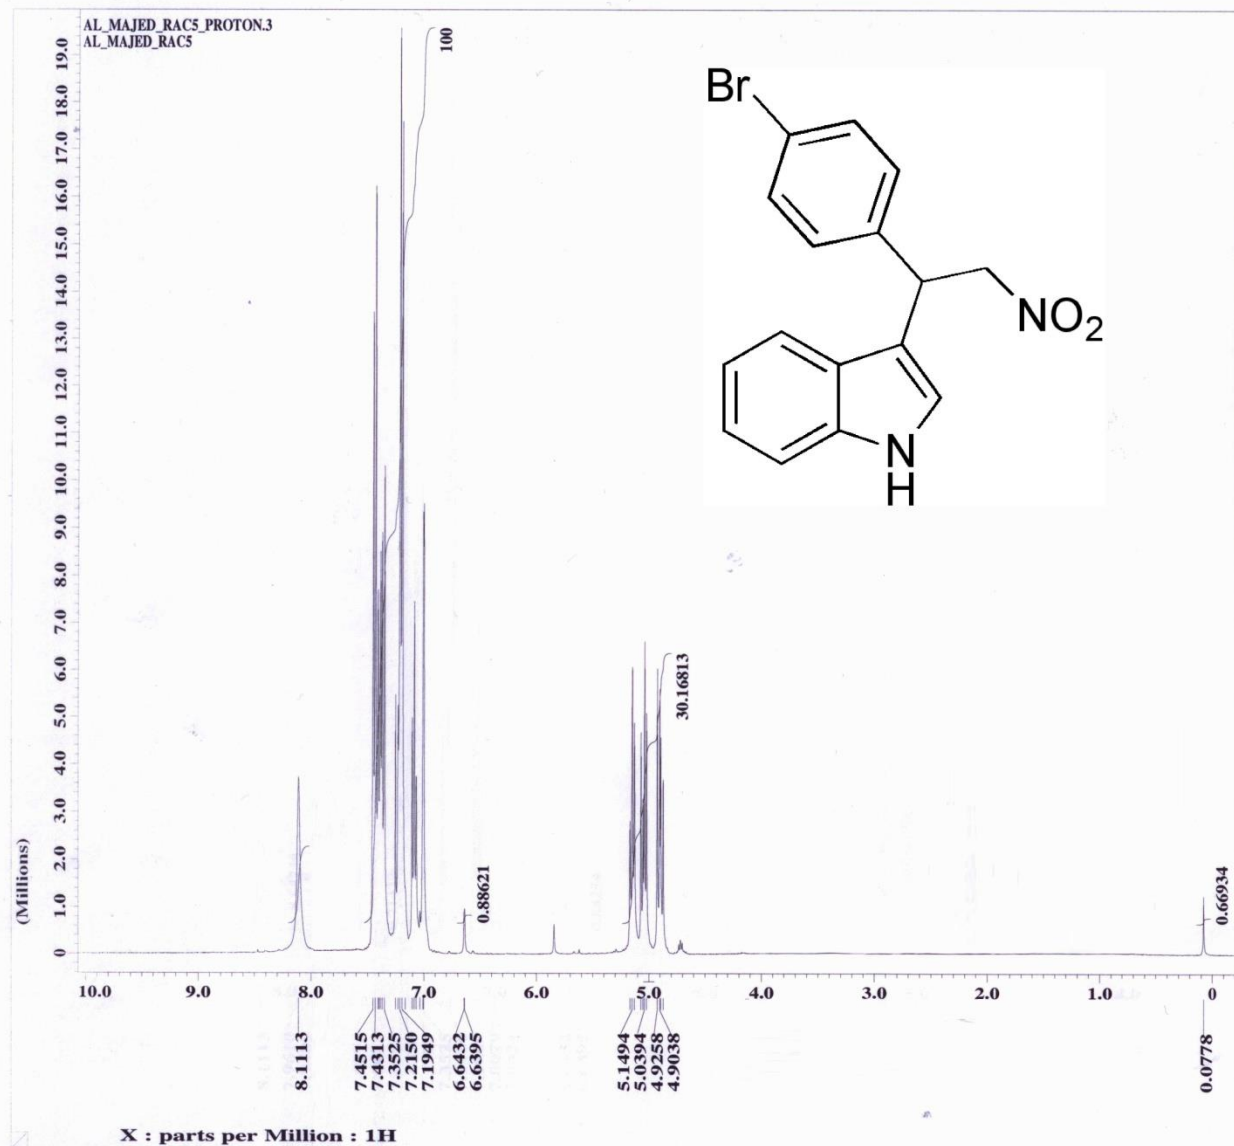

**JEOL**

---- ACQUISITION PARAMETERS ----  
 File Name = AL\_MAJED\_RACS\_PROTON.3  
 Author = DR. M. MARASHDAH  
 Sample ID = AL\_MAJED\_RACS  
 Content = AL\_MAJED\_RACS  
 Creation Date = 30-JAN-2013 09:00:23  
 Revision Date = 30-JAN-2013 09:45:10  
 Spec Site = ECP400  
 Spec Type = DELTA NMR  
 Data Format = 1D COMPLEX  
 Dimensions = X  
 Dim Title = 1H  
 Dim Size = 16384  
 Dim Units = [ppm]  
 Experiment = single\_pulse.exp  
 Field\_strength = 9.389766 [T]  
 X\_domain = 1H  
 X\_freq = 399.7841973 [MHz]  
 X\_offset = 5 [ppm]  
 X\_sweep = 12.00480192 [kHz]  
 X\_points = 16384  
 X\_resolution = 0.73275969 [Hz]  
 Recvr\_gain = 17  
 Filter\_mode = BUTTERWORTH  
 X\_prescans = 0  
 Scans = 8  
 Irr\_noise = WALTZ  
 Irr\_width = 50 [us]  
 Relaxation\_delay = 4 [s]  
 Solvent = CHLOROFORM-D  
 Temp\_get = 20.2 [dC]  
 Spin\_get = 15 [Hz]  
 Probe\_id = 2564

Compound 7e: <sup>13</sup>C-NMR

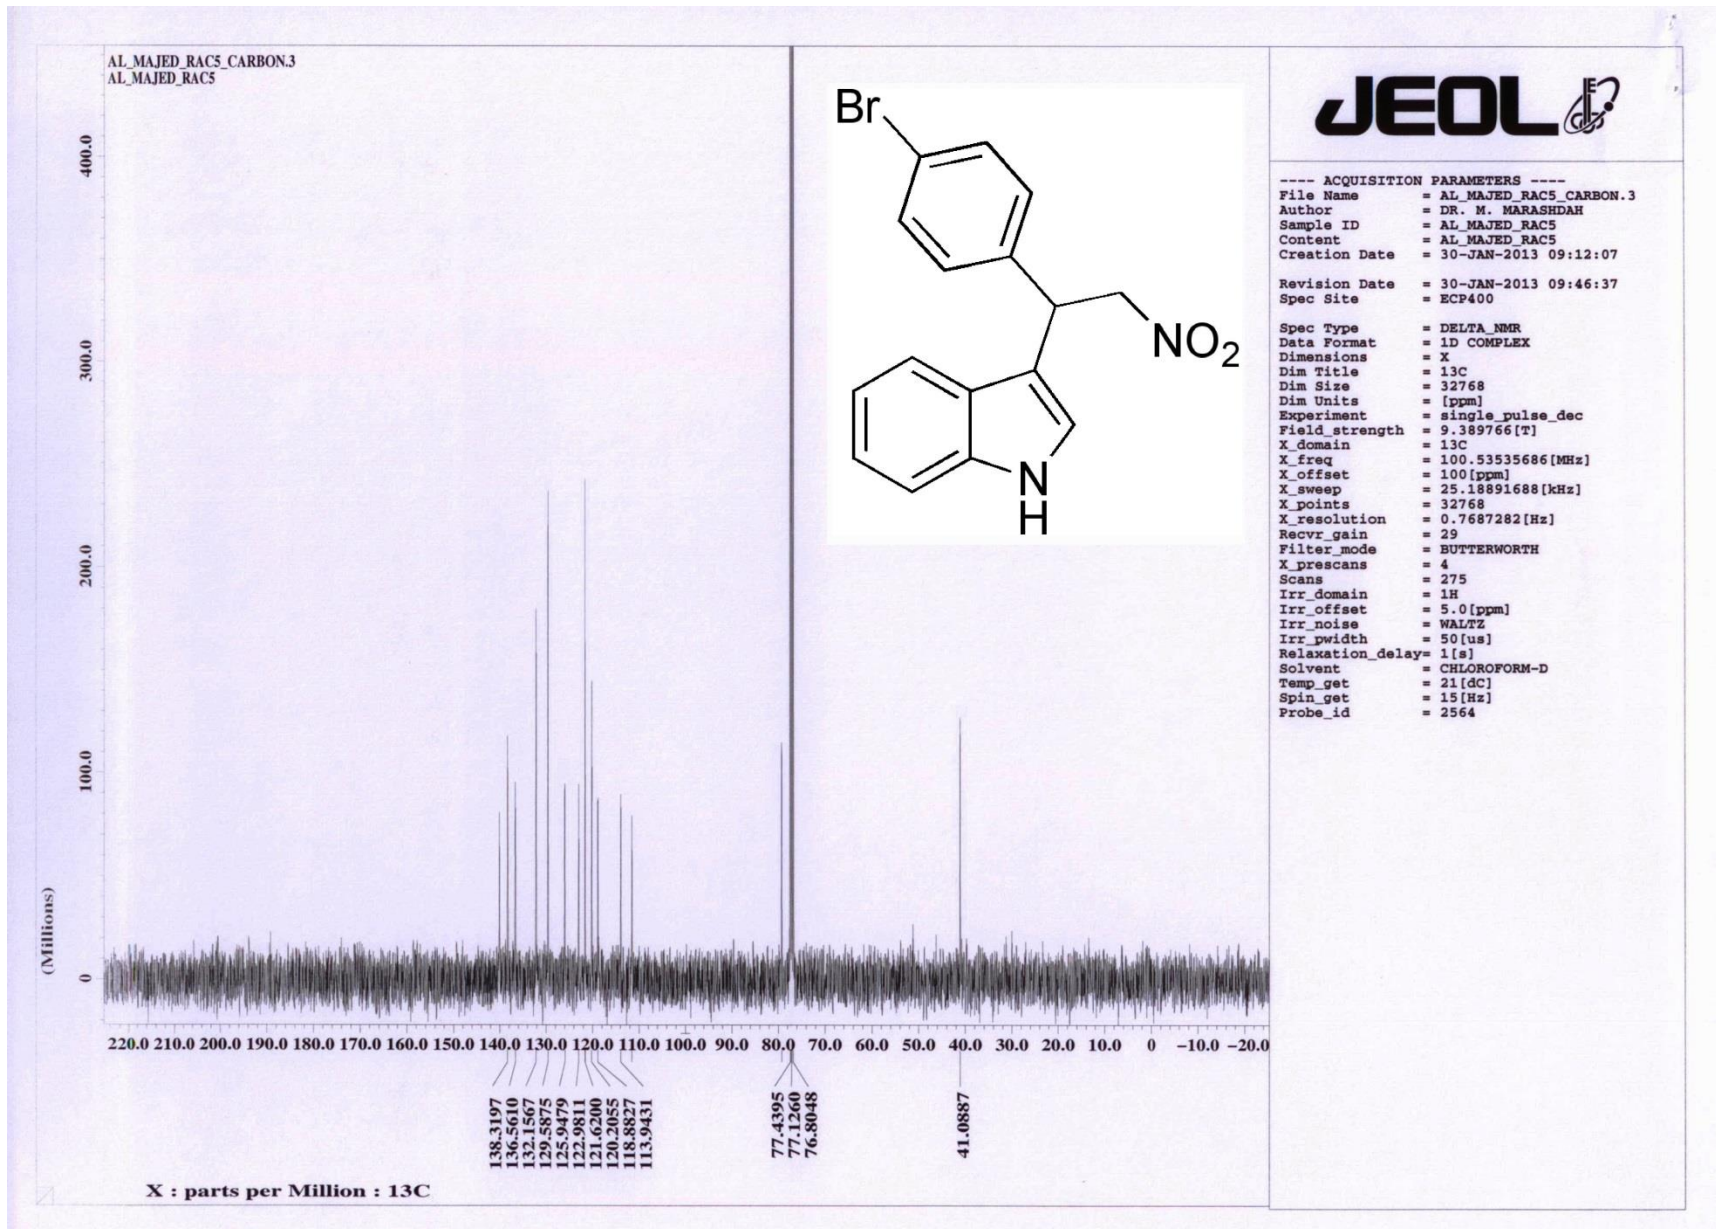

Compound 7f: <sup>1</sup>H-NMR

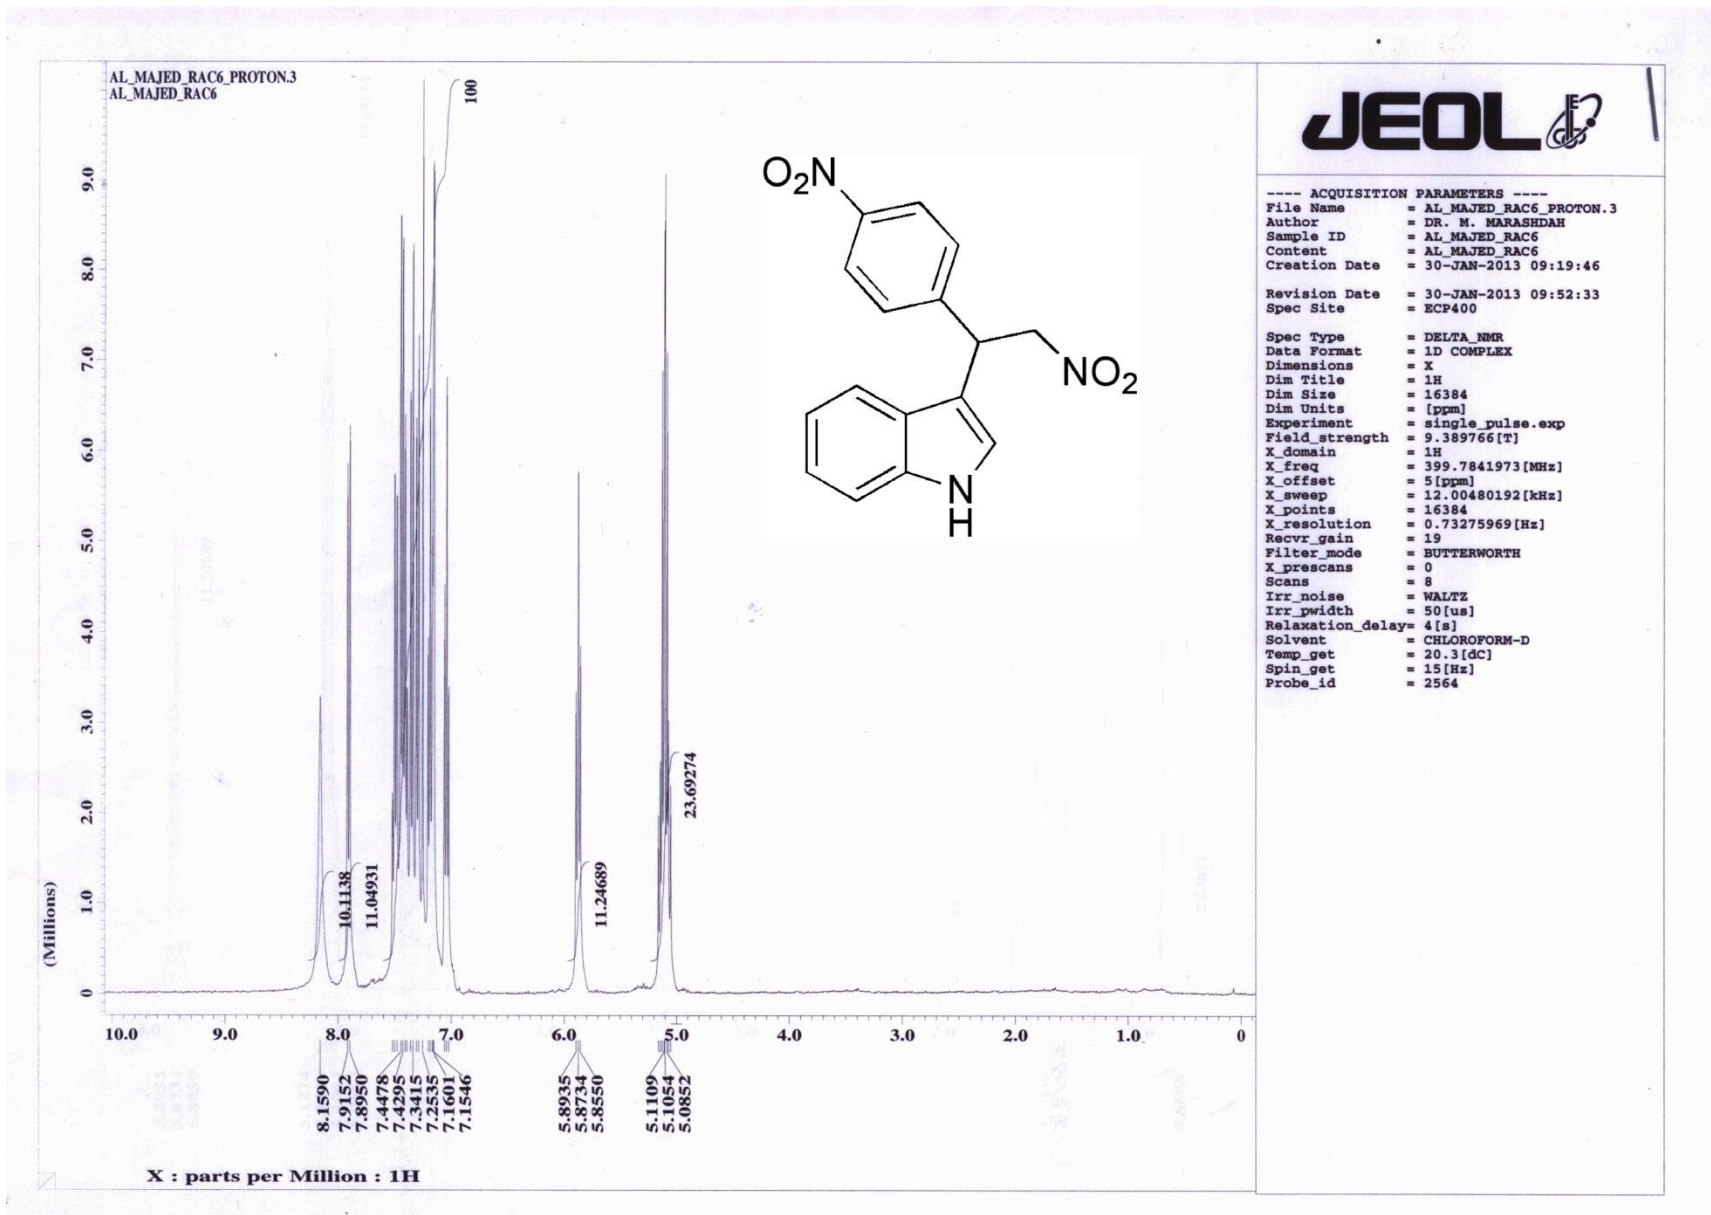

Compound 7f: <sup>13</sup>C-NMR

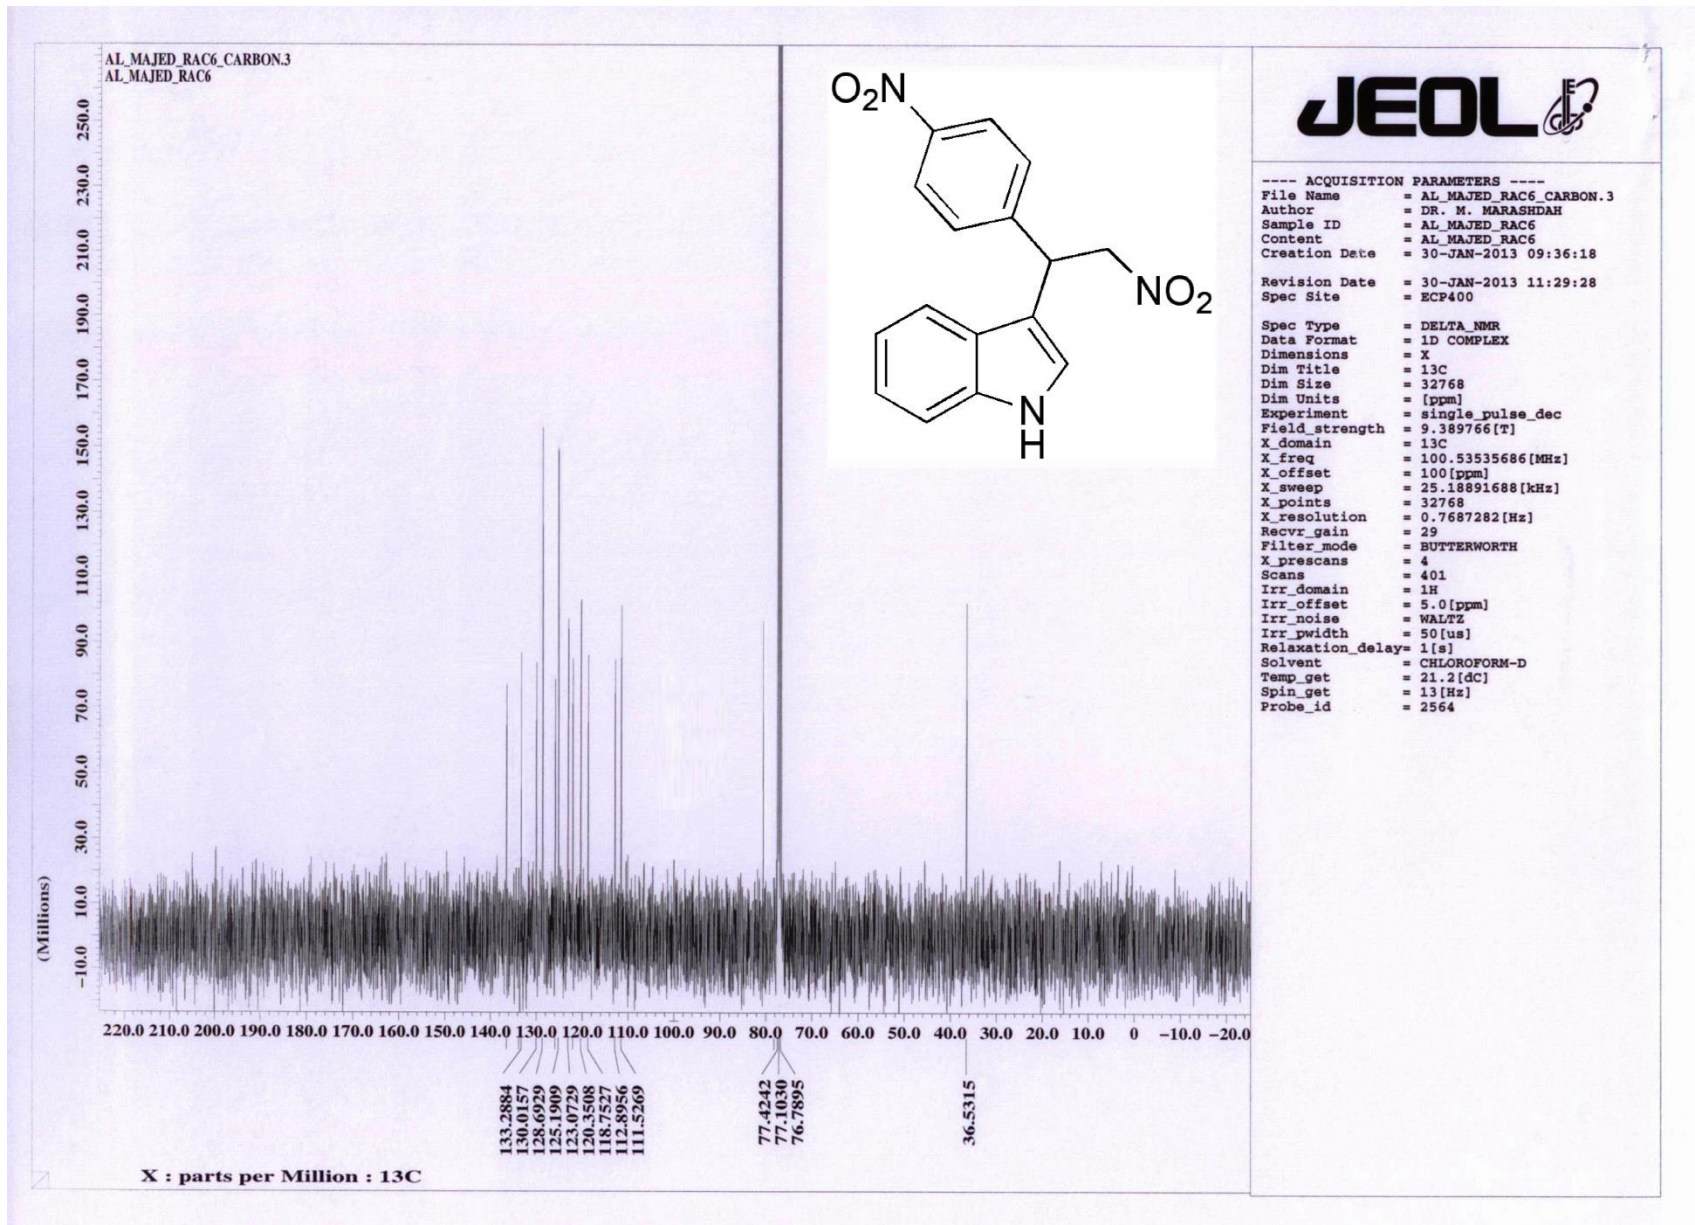

Compound 7g: <sup>1</sup>H-NMR

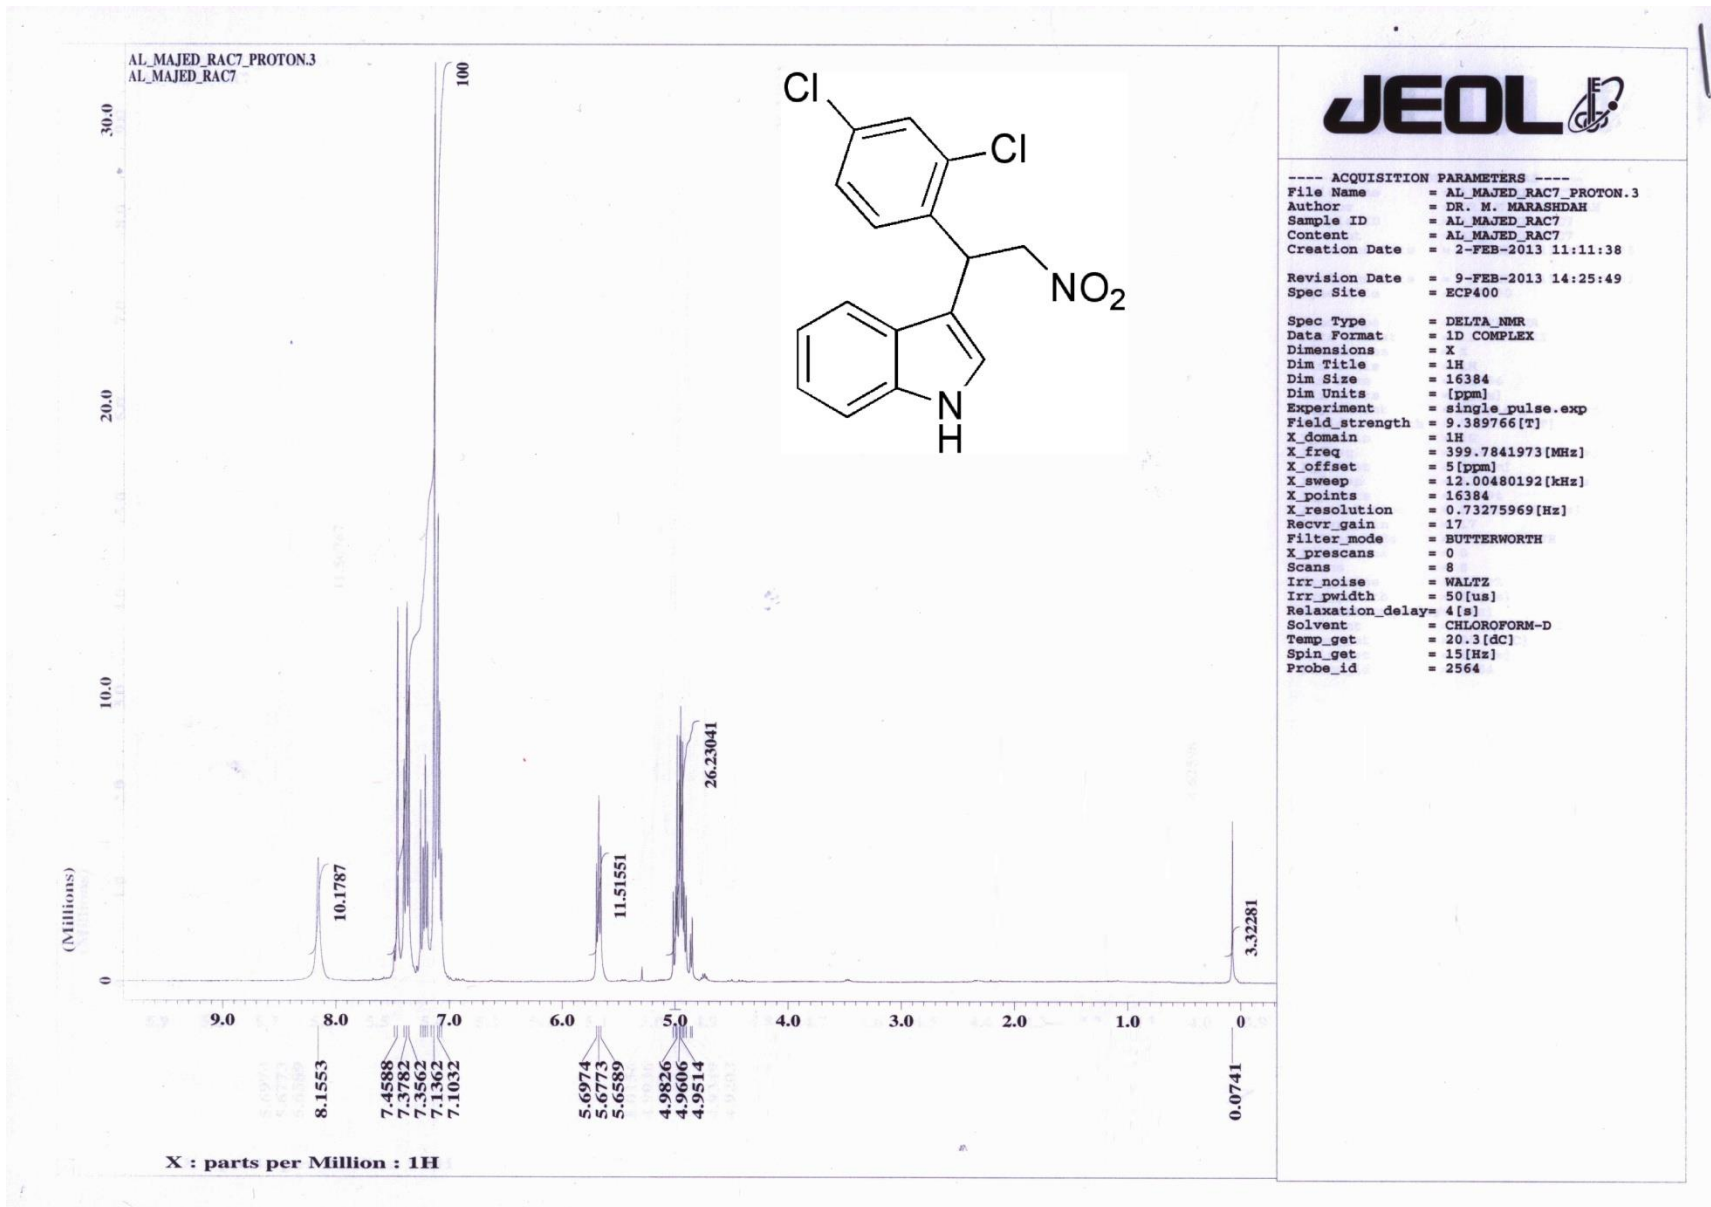

Compound 7g: <sup>13</sup>C-NMR

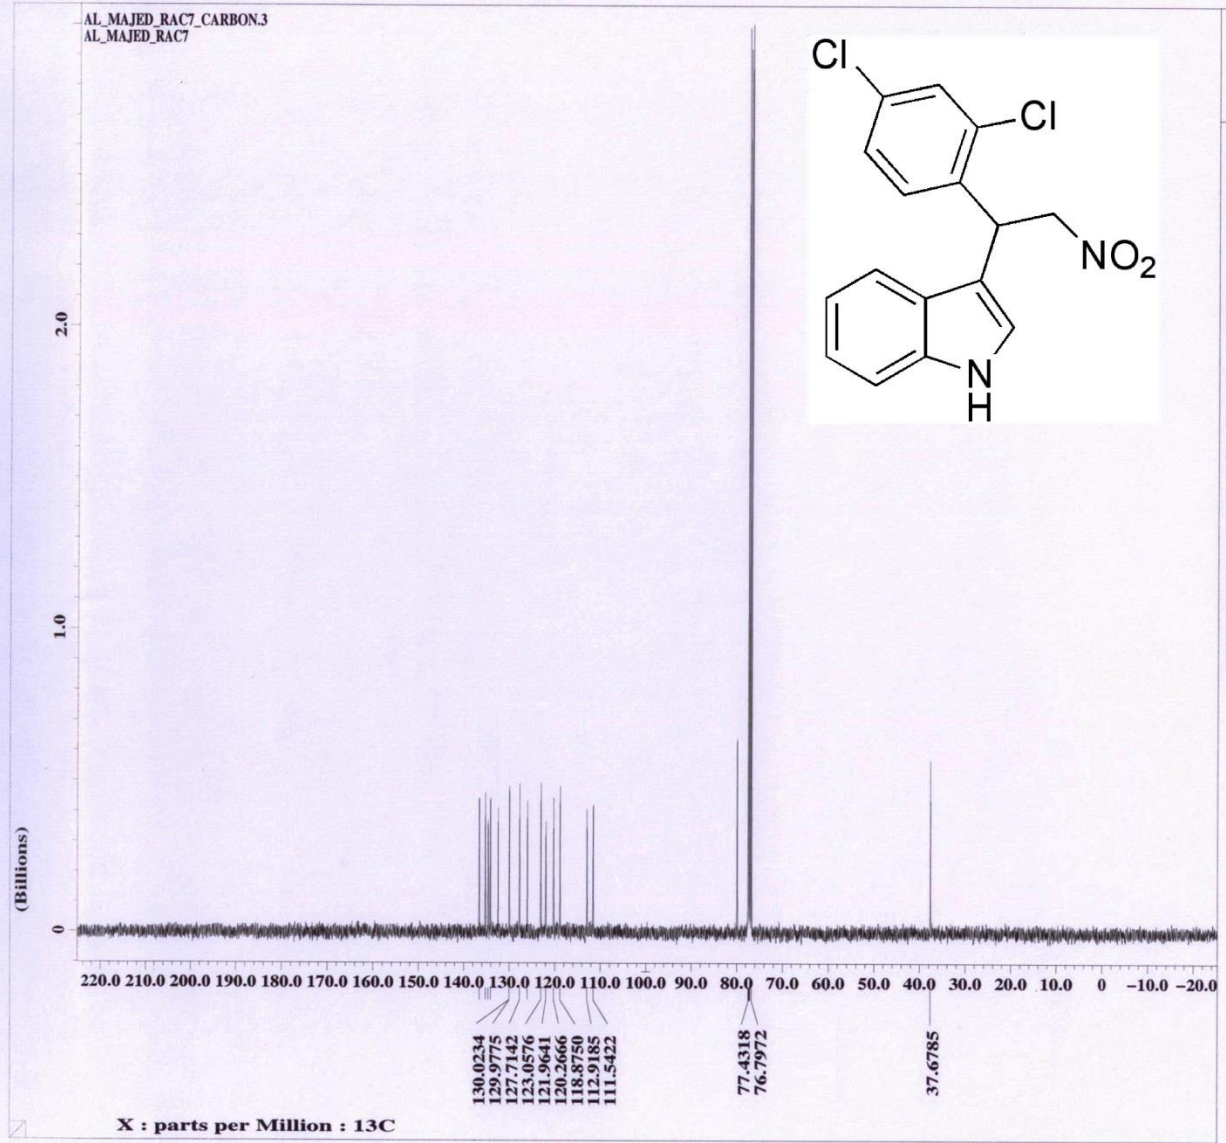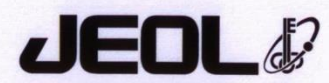

---- ACQUISITION PARAMETERS ----

File Name = AL\_MAJED\_RAC7\_CARBON.3  
 Author = DR. M. MARASHDAH  
 Sample ID = AL\_MAJED\_RAC7  
 Content = AL\_MAJED\_RAC7  
 Creation Date = 2-FEB-2013 11:43:27

Revision Date = 2-FEB-2013 14:23:01  
 Spec Site = ECP400

Spec Type = DELTA\_NMR  
 Data Format = 1D\_COMPLEX  
 Dimensions = X  
 Dim Title = 13C  
 Dim Size = 32768  
 Dim Units = [ppm]  
 Experiment = single\_pulse\_dec  
 Field\_strength = 9.389766[T]  
 X\_domain = 13C  
 X\_freq = 100.53535686[MHz]  
 X\_offset = 100[ppm]  
 X\_sweep = 25.18891688[kHz]  
 X\_points = 32768  
 X\_resolution = 0.7687282[Hz]  
 Recvr\_gain = 29  
 Filter\_mode = BUTTERWORTH  
 X\_prescans = 4  
 Scans = 800  
 Irr\_domain = 1H  
 Irr\_offset = 5.0[ppm]  
 Irr\_noise = WALTZ  
 Irr\_pwidth = 50[us]  
 Relaxation\_delay = 1[s]  
 Solvent = CHLOROFORM-D  
 Temp\_get = 21.3[dC]  
 Spin\_get = 15[Hz]  
 Probe\_id = 2564

Compound 7h: <sup>1</sup>H-NMR

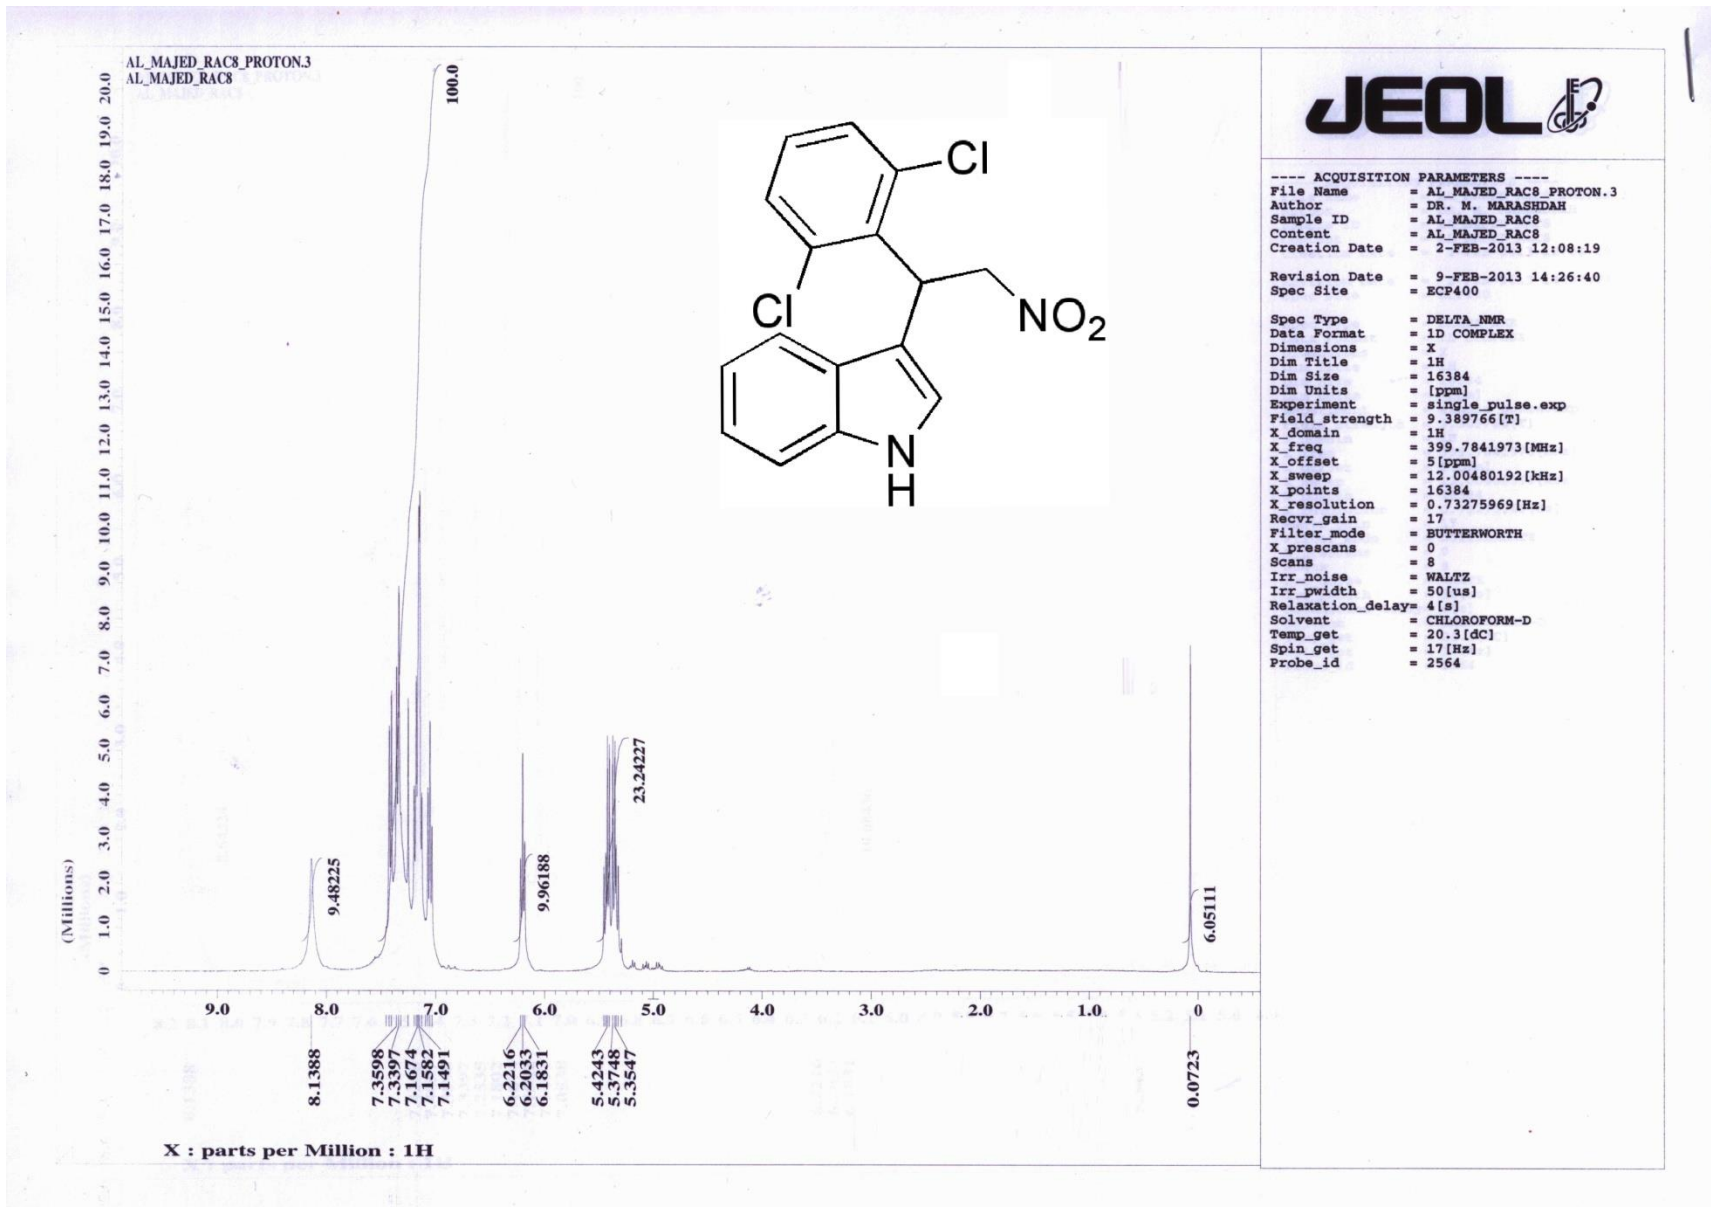



Compound 7h: <sup>13</sup>C-NMR

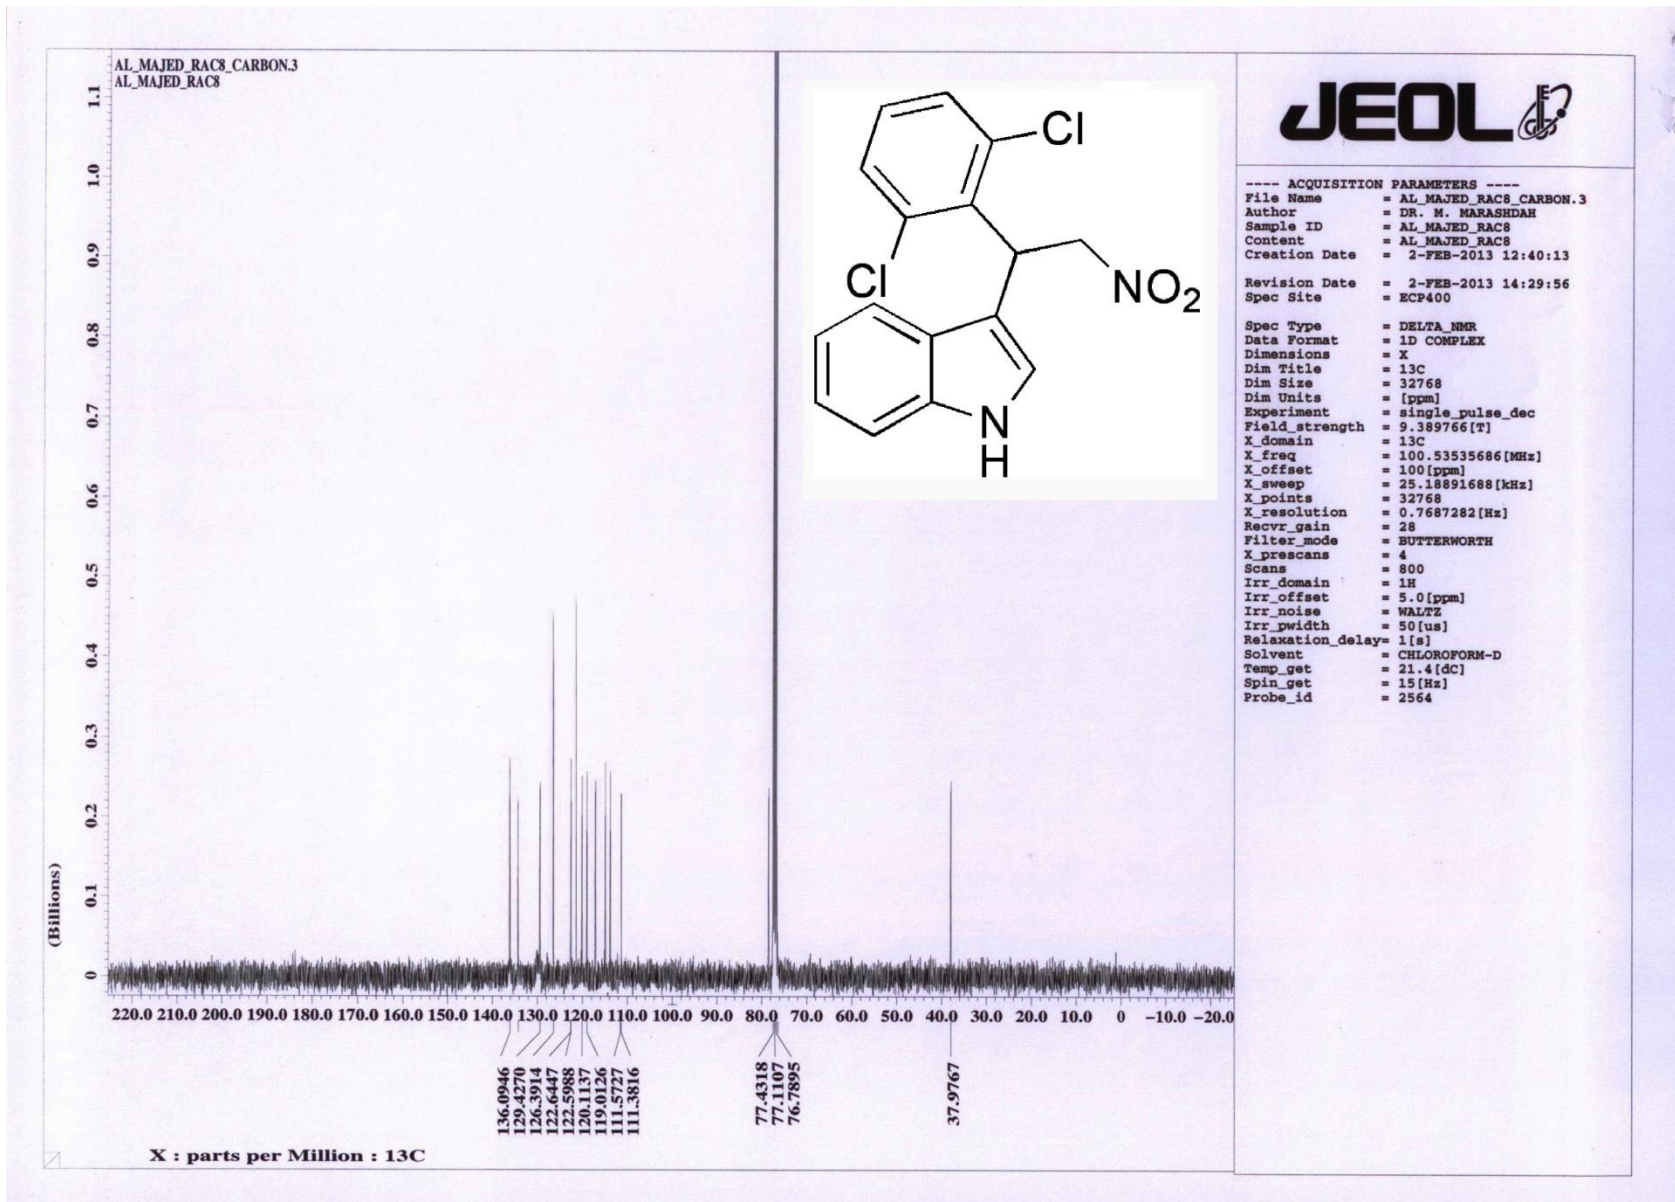

Compound 7i: <sup>1</sup>H-NMR

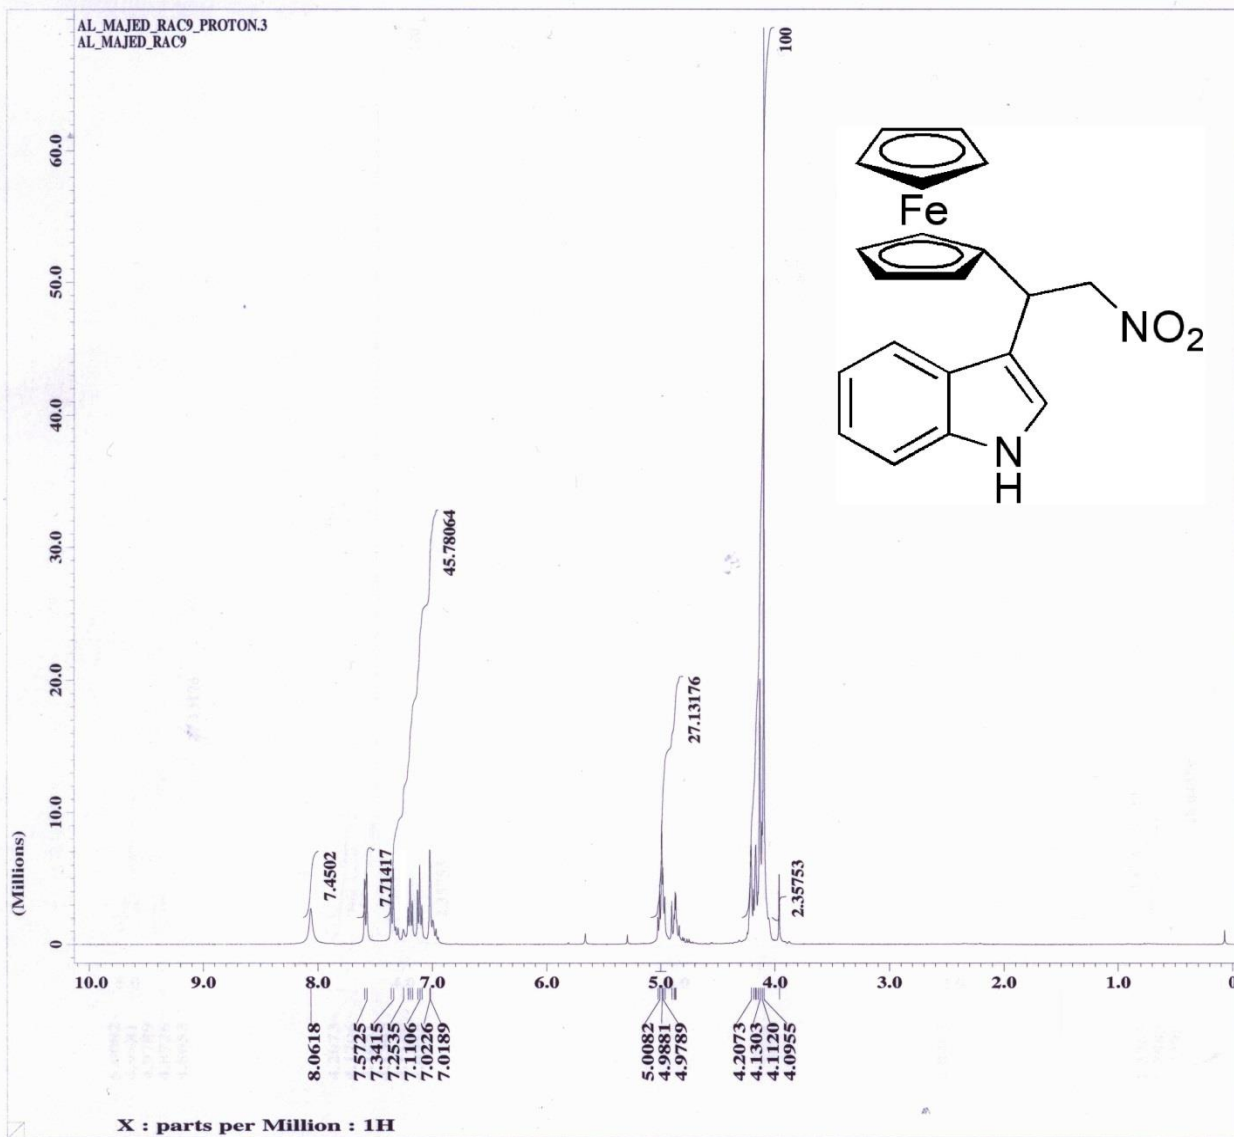

**JEOL**

---- ACQUISITION PARAMETERS ----  
 File Name = AL\_MAJED\_RAC9\_PROTON.3  
 Author = DR. M. MARASHDAH  
 Sample ID = AL\_MAJED\_RAC9  
 Content = AL\_MAJED\_RAC9  
 Creation Date = 3-FEB-2013 10:20:15  
 Revision Date = 3-FEB-2013 11:16:17  
 Spec Site = ECP400  
 Spec Type = DELTA\_NMR  
 Data Format = 1D\_COMPLEX  
 Dimensions = X  
 Dim Title = 1H  
 Dim Size = 16384  
 Dim Units = [ppm]  
 Experiment = single\_pulse.exp  
 Field\_strength = 9.389766[T]  
 X\_domain = 1H  
 X\_freq = 399.7841973[MHz]  
 X\_offset = 5[ppm]  
 X\_sweep = 12.00480192[kHz]  
 X\_points = 16384  
 X\_resolution = 0.73275969[Hz]  
 Recvr\_gain = 17  
 Filter\_mode = BUTTERWORTH  
 X\_prescans = 0  
 Scans = 8  
 Irr\_noise = WALTZ  
 Irr\_pwidth = 50[us]  
 Relaxation\_delay = 4[s]  
 Solvent = CHLOROFORM-D  
 Temp\_get = 19.4[dC]  
 Spin\_get = 13[Hz]  
 Probe\_id = 2564

Compound 7i: <sup>13</sup>C-NMR

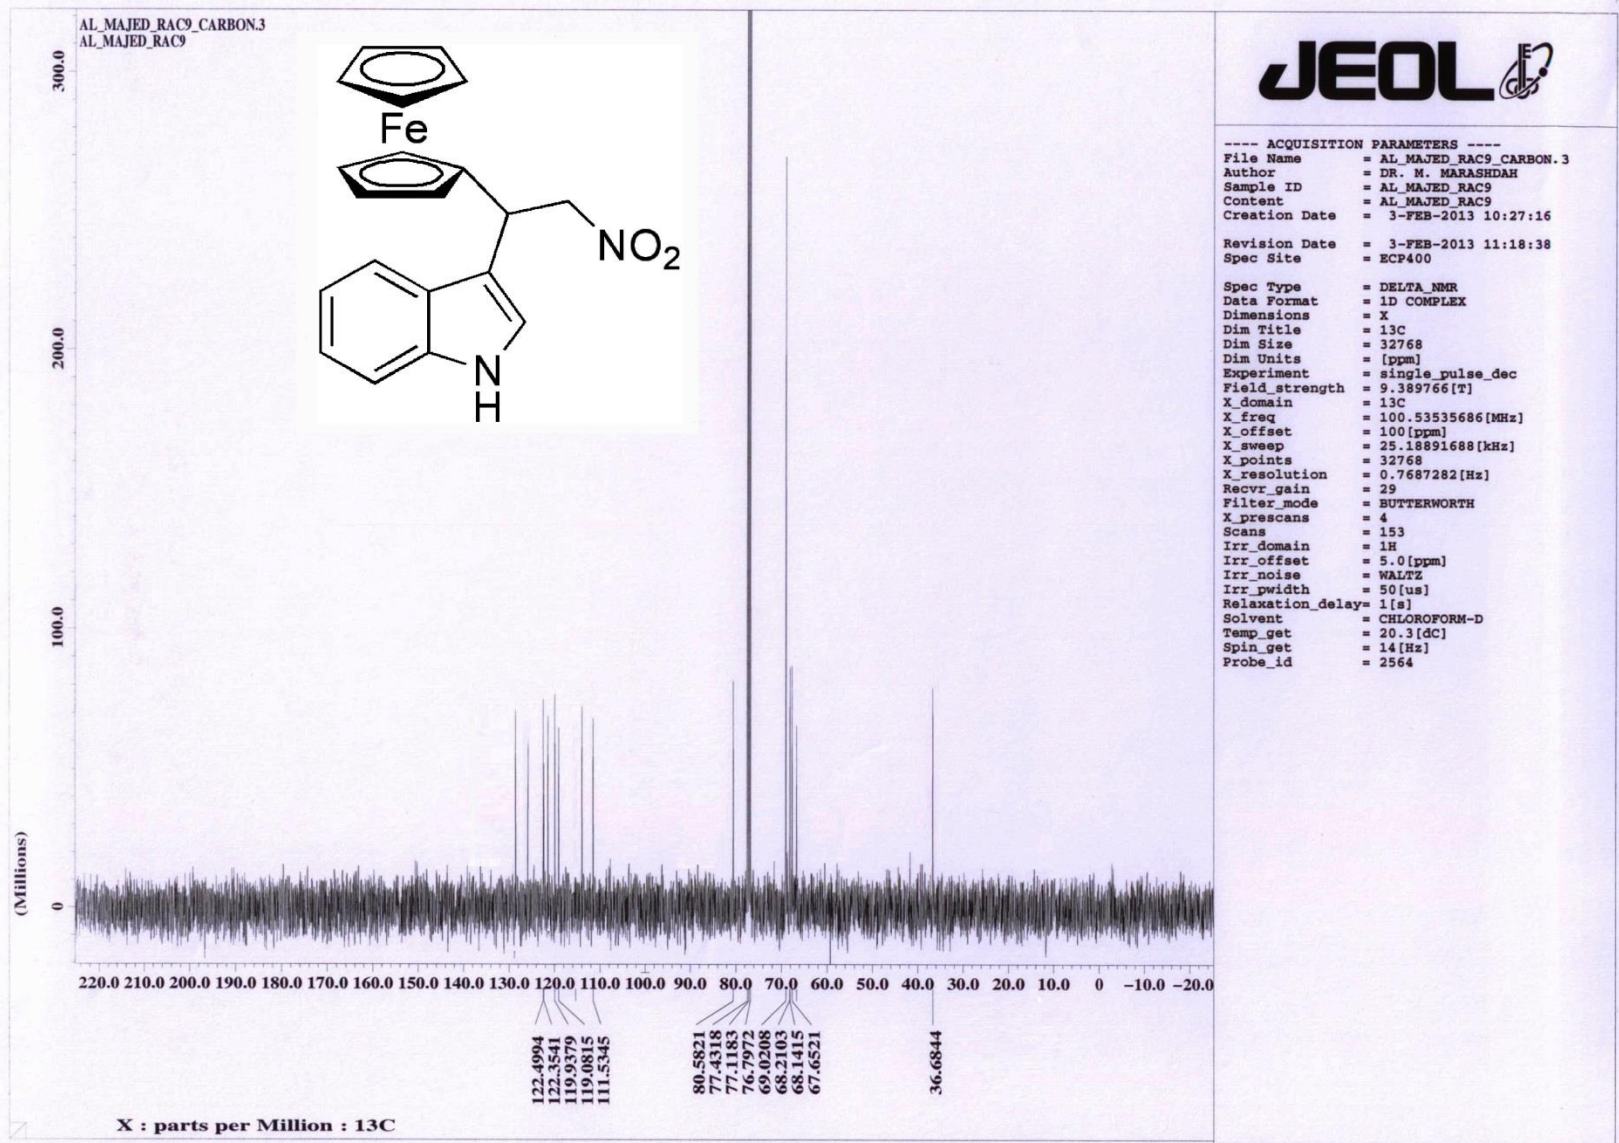

Compound 8a: <sup>1</sup>H-NMR

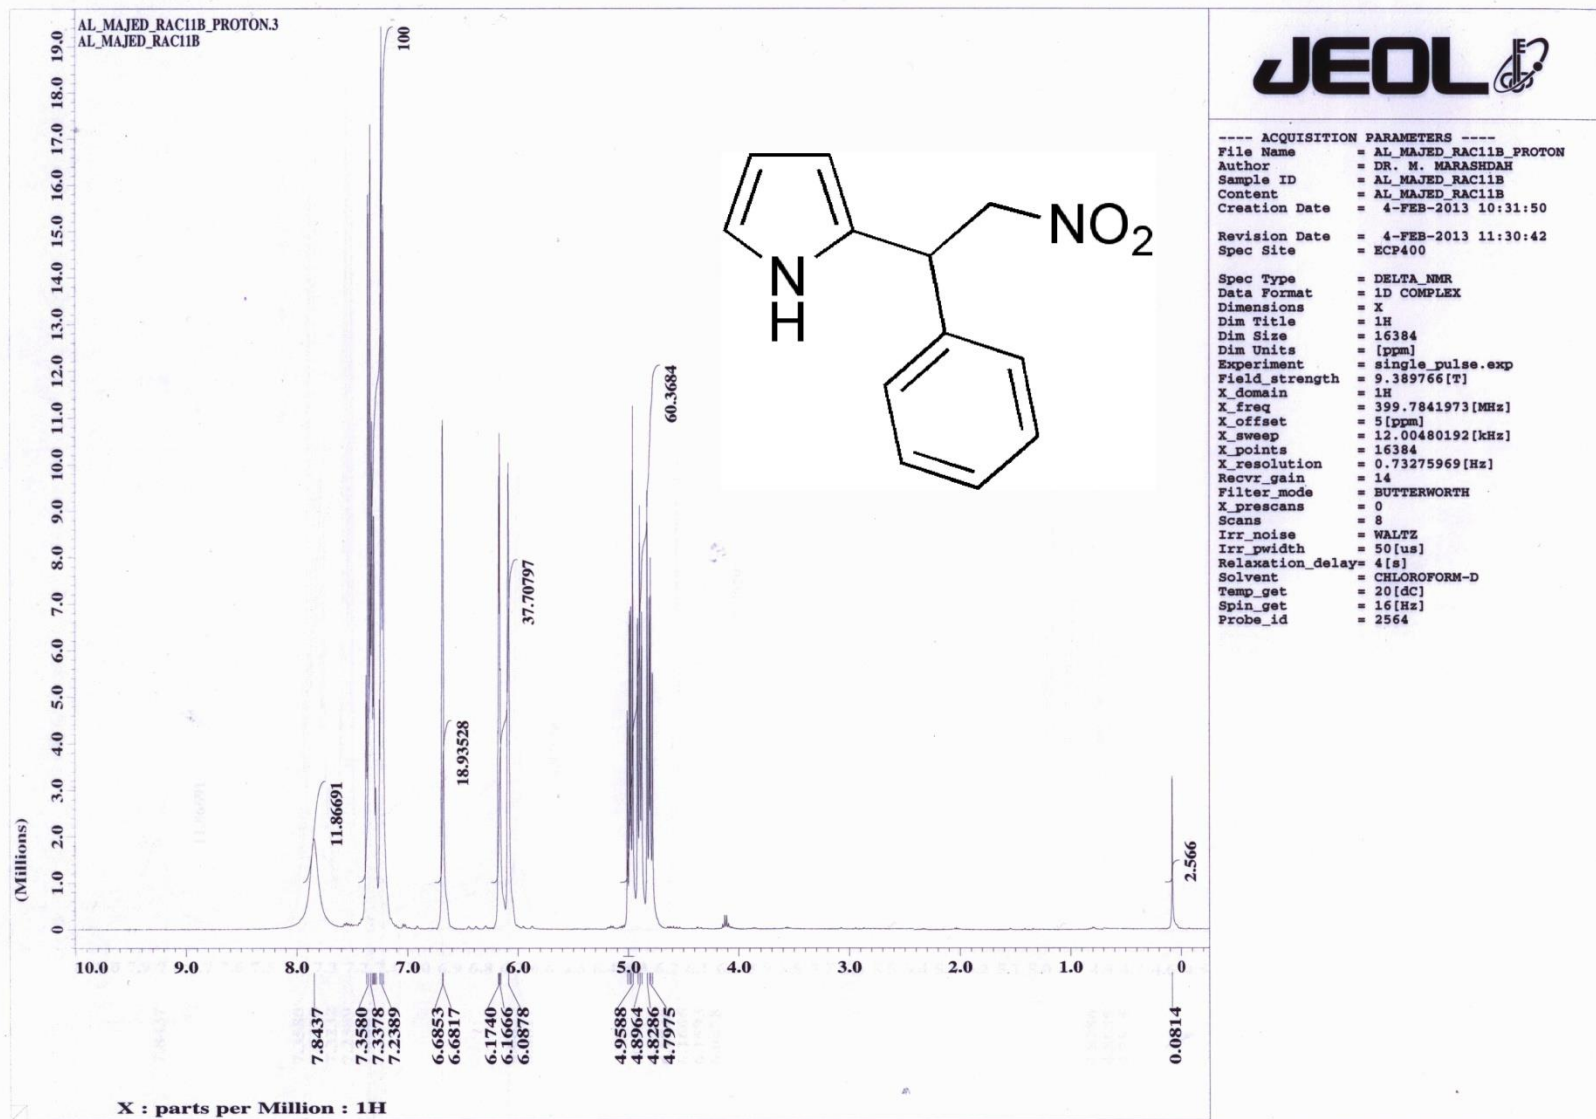

Compound 8a: <sup>13</sup>C-NMR

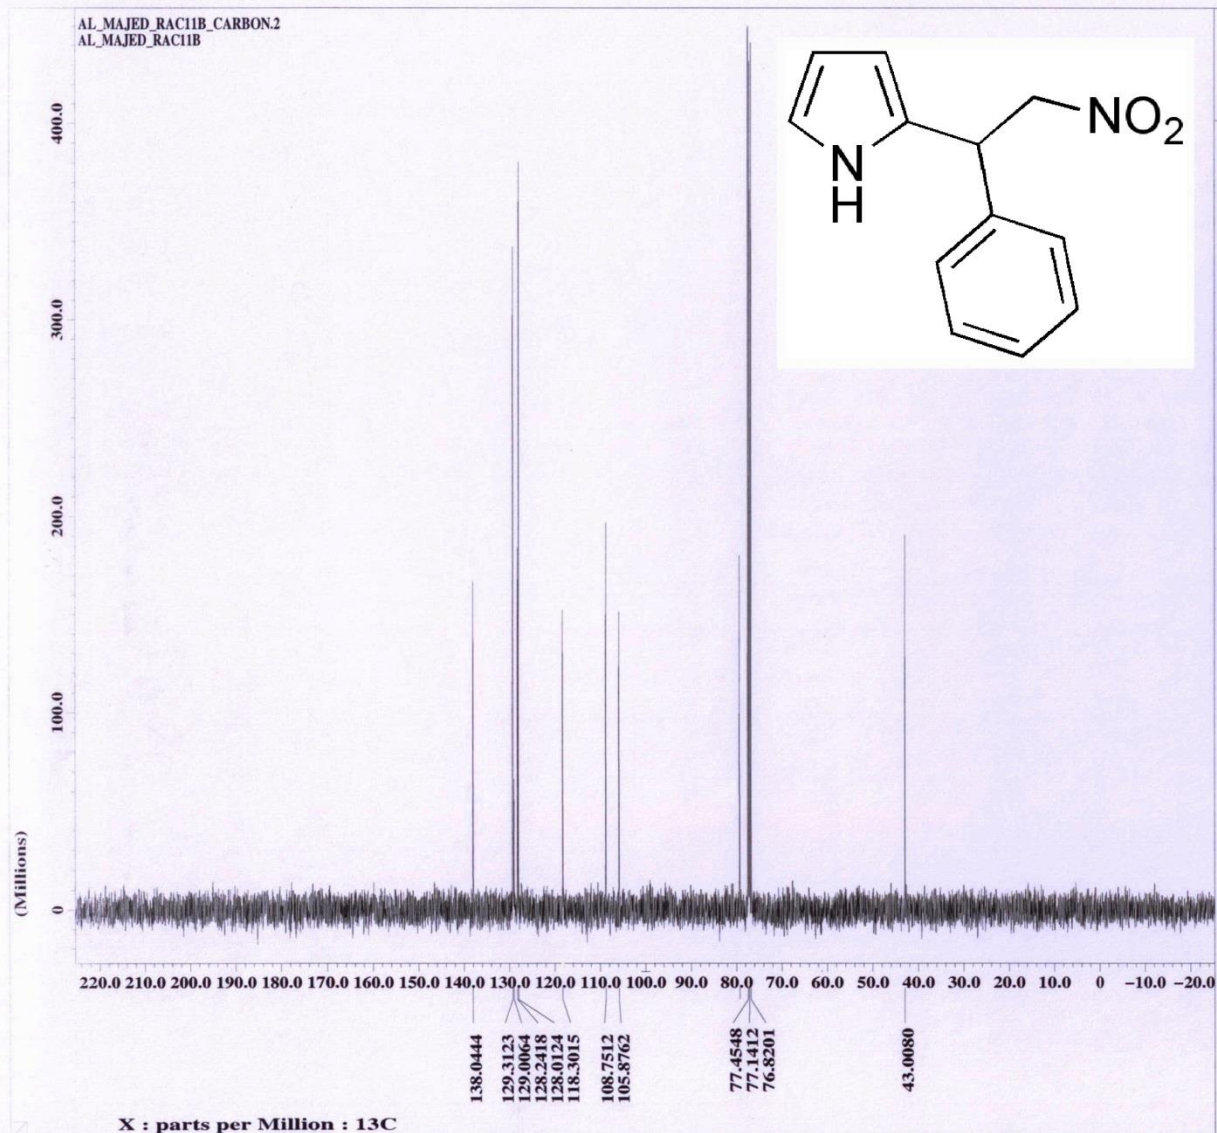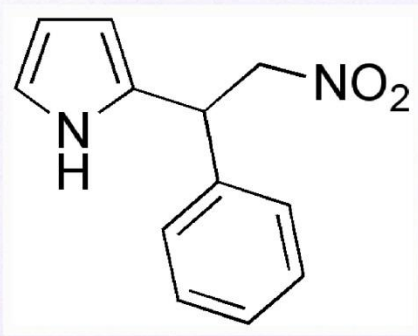

**JEOL**

---- ACQUISITION PARAMETERS ----  
 File Name = AL\_MAJED\_RAC11B\_CARBON  
 Author = DR. M. MARASHDAH  
 Sample ID = AL\_MAJED\_RAC11B  
 Content = AL\_MAJED\_RAC11B  
 Creation Date = 4-FEB-2013 10:37:12  
 Revision Date = 4-FEB-2013 11:31:33  
 Spec Site = ECP400  
 Spec Type = DELTA\_NMR  
 Data Format = 1D\_COMPLEX  
 Dimensions = X  
 Dim Title = 13C  
 Dim Size = 32768  
 Dim Units = [ppm]  
 Experiment = single\_pulse\_dec  
 Field\_strength = 9.389766 [T]  
 X\_domain = 13C  
 X\_freq = 100.53535686 [MHz]  
 X\_offset = 100 [ppm]  
 X\_sweep = 25.18891688 [kHz]  
 X\_points = 32768  
 X\_resolution = 0.7687282 [Hz]  
 Recvr\_gain = 29  
 Filter\_mode = BUTTERWORTH  
 X\_prescans = 4  
 Scans = 110  
 Irr\_domain = 1H  
 Irr\_offset = 5.0 [ppm]  
 Irr\_noise = WALTZ  
 Irr\_pwidth = 50 [us]  
 Relaxation\_delay = 1 [s]  
 Solvent = CHLOROFORM-D  
 Temp\_get = 20.9 [dC]  
 Spin\_get = 13 [Hz]  
 Probe\_id = 2564

Compound 9a: <sup>1</sup>H-NMR

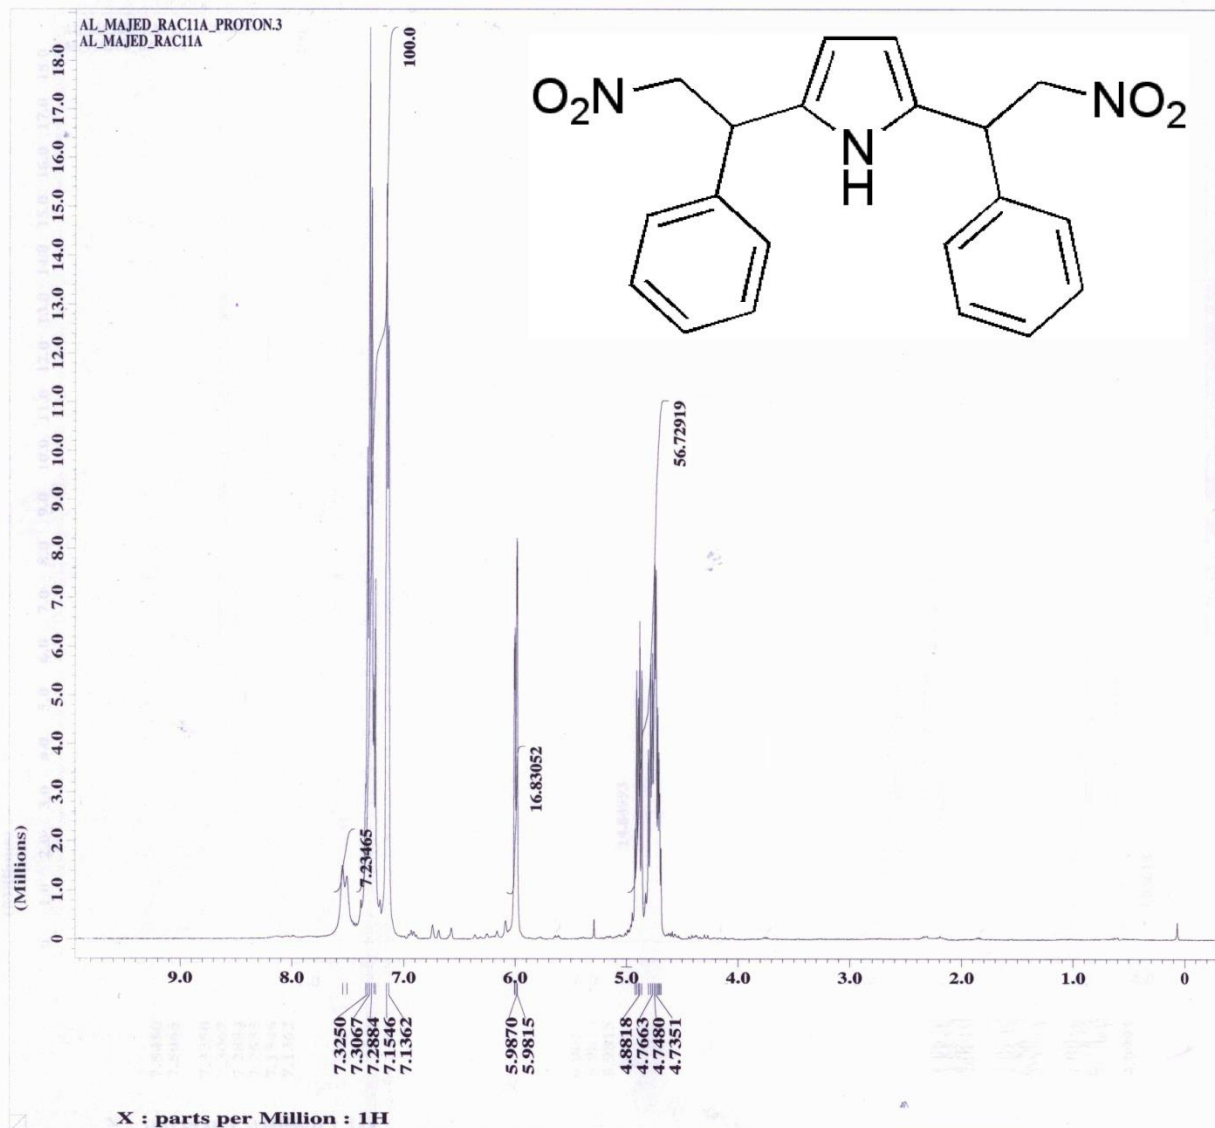

**JEOL**

```

---- ACQUISITION PARAMETERS ----
File Name      = AL_MAJED_RAC11A_PROTON
Author         = DR. M. MARASHDAH
Sample ID      = AL_MAJED_RAC11A
Content        = AL_MAJED_RAC11A
Creation Date   = 4-FEB-2013 09:57:19

Revision Date  = 4-FEB-2013 10:35:29
Spec Site      = ECP400

Spec Type      = DELTA_NMR
Data Format     = 1D_COMPLEX
Dimensions     = X
Dim Title      = 1H
Dim Size       = 16384
Dim Units      = [ppm]
Experiment     = single_pulse.exp
Field strength = 9.389766[T]
X_domain       = 1H
X_freq         = 399.7841973[MHz]
X_offset       = 5[ppm]
X_sweep        = 12.00480192[kHz]
X_points       = 16384
X_resolution   = 0.73275969[Hz]
Recvr_gain     = 17
Filter_mode    = BUTTERWORTH
X_prescans     = 0
Scans          = 8
Irr_noise      = WALTZ
Irr_pwidth     = 50[us]
Relaxation_delay = 4[s]
Solvent        = CHLOROFORM-D
Temp_get       = 19.7[dc]
Spin_get       = 15[Hz]
Probe_id       = 2564
    
```

Compound 9a: <sup>13</sup>C-NMR

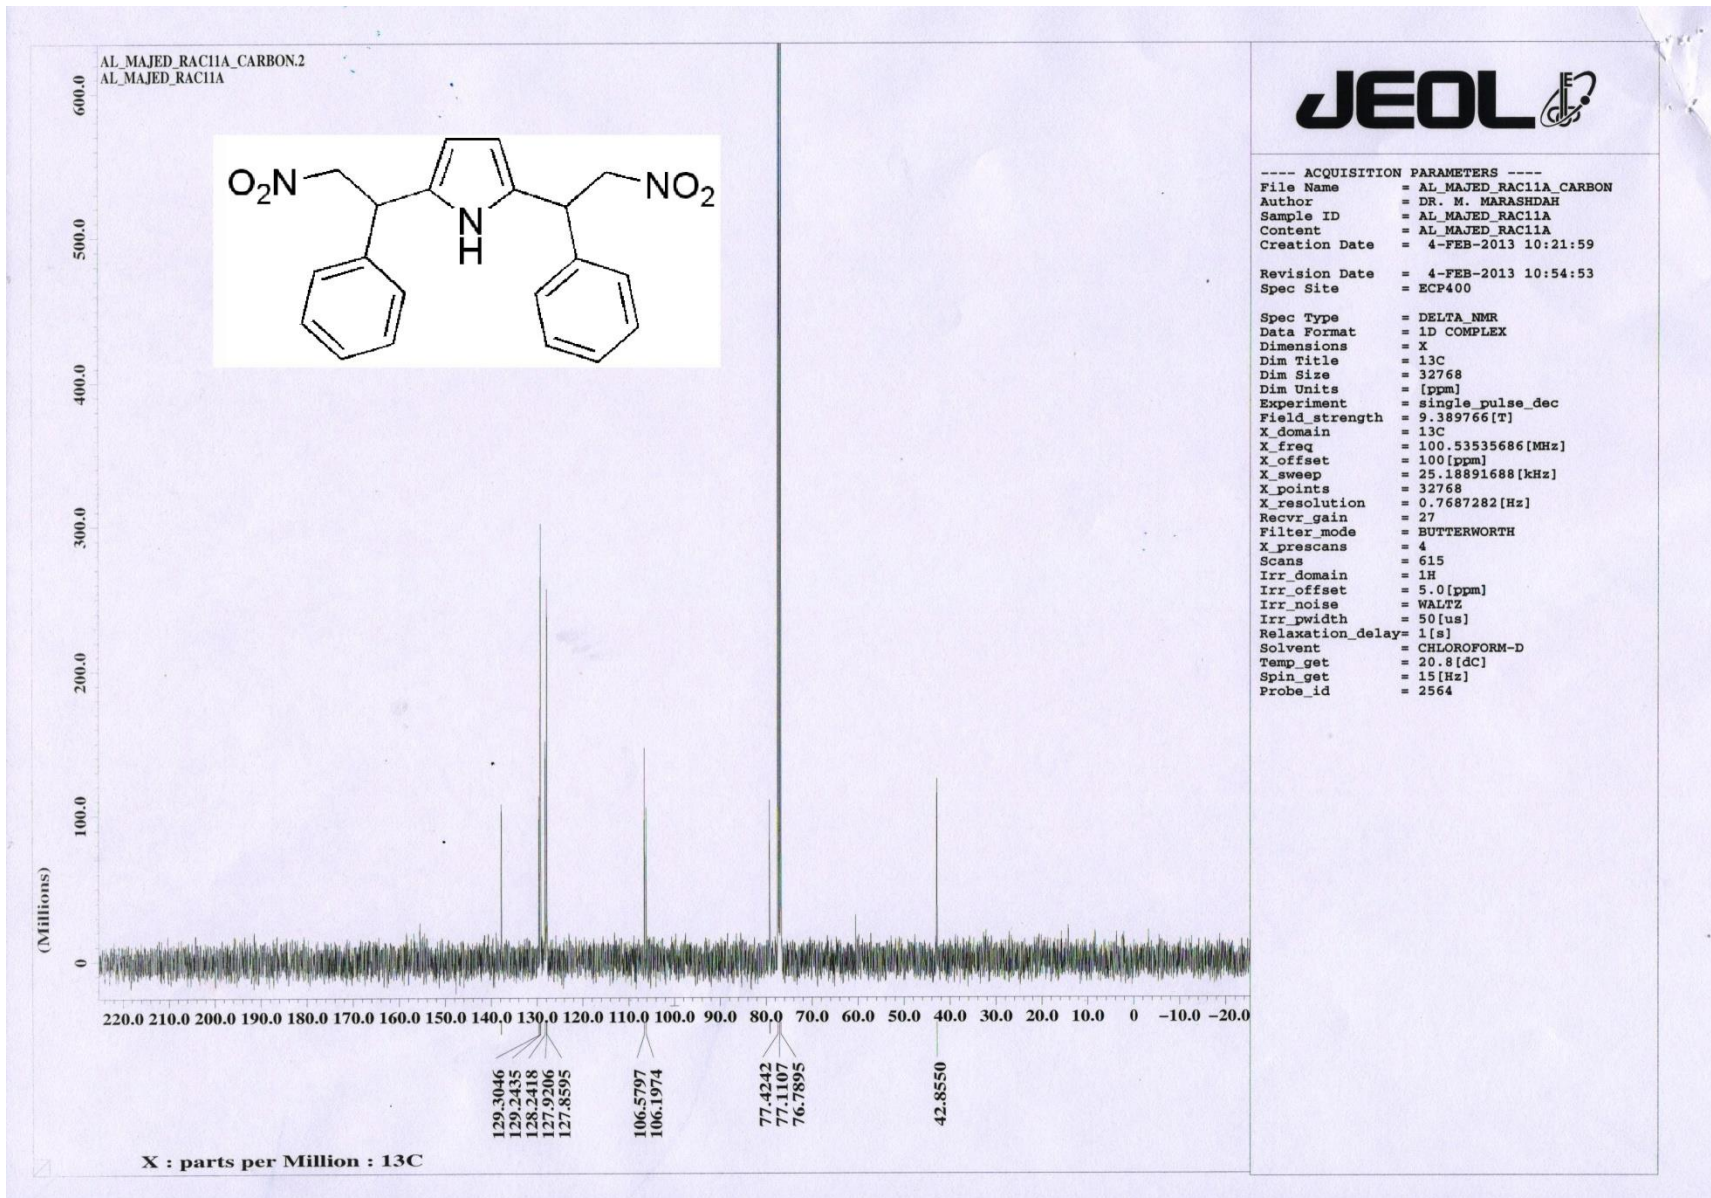

Compound 8b: <sup>1</sup>H-NMR

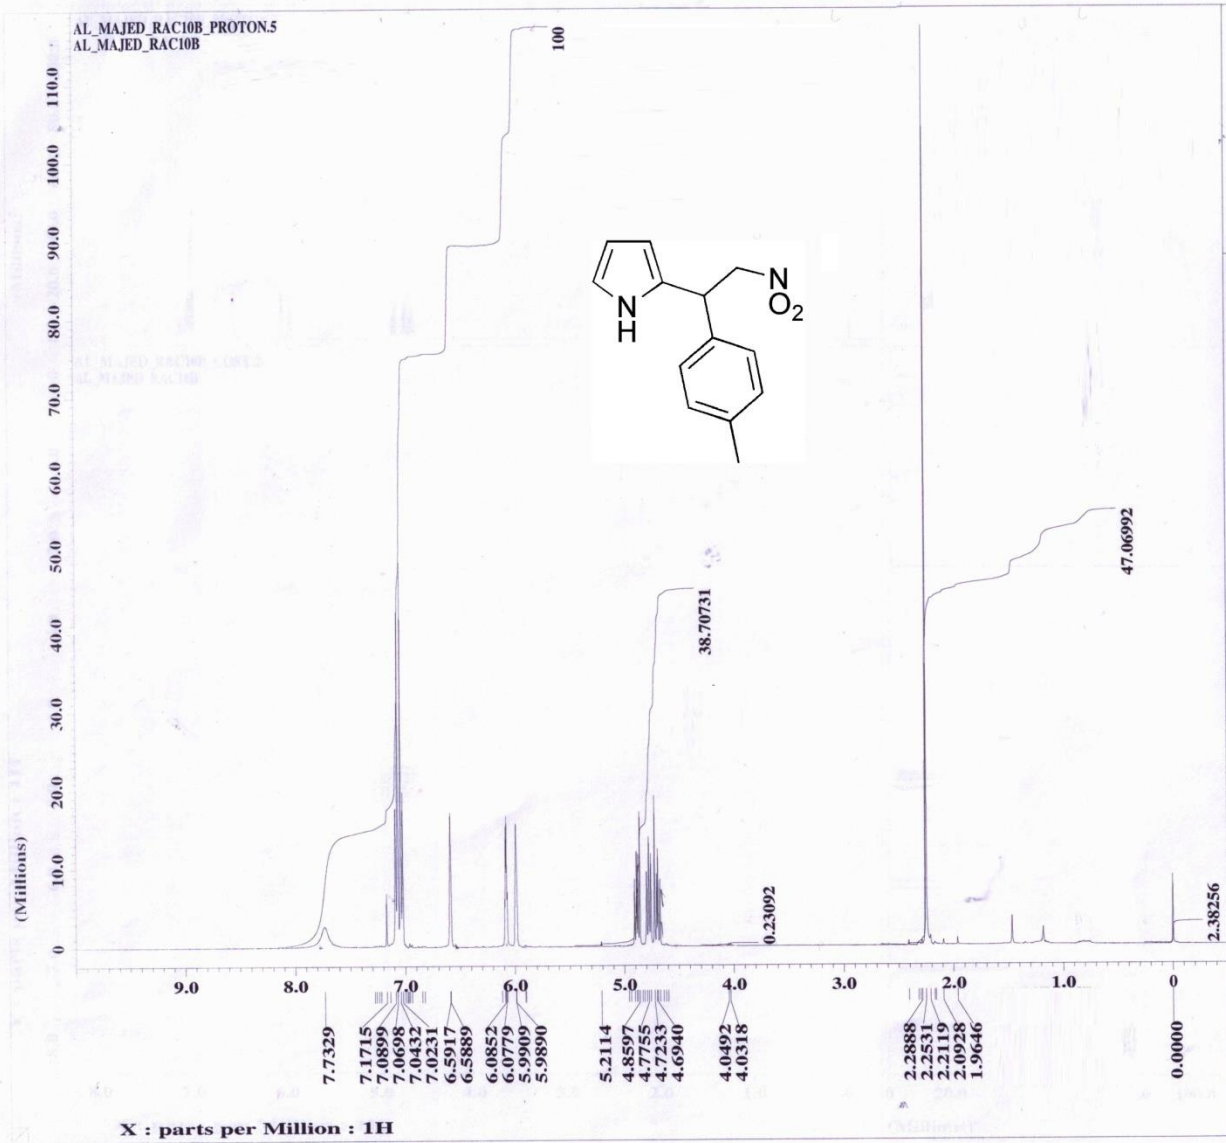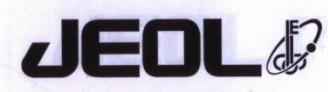

File Name = AL\_MAJED\_RAC10B\_PROTON  
 Author = DR. H. MARASHDAH  
 Sample ID = AL\_MAJED\_RAC10B  
 Content = AL\_MAJED\_RAC10B  
 Creation Date = 26-JAN-2013 12:53:12  
 Revision Date = 26-JAN-2013 13:25:42

Spec Site = ECP400  
 Spec Type = DELTA\_NMR

Data Format = 1D\_COMPLEX  
 Dimensions = X  
 Dim Title = 1H  
 Dim Size = 16384  
 Dim Units = [ppm]  
 Experiment = single\_pulse.exp  
 Field\_strength = 9.389766[T]  
 X\_domain = 1H  
 X\_freq = 399.7841973[MHz]  
 X\_offset = 5[ppm]  
 X\_sweep = 5.99880024[kHz]  
 X\_points = 16384  
 X\_resolution = 0.36616006[Hz]  
 Recvr\_gain = 15  
 Filter\_mode = BUTTERWORTH  
 X\_prescans = 0  
 Scans = 16  
 Irr\_noise = WALTZ  
 Irr\_width = 50[us]  
 Relaxation\_delay = 4[s]  
 Solvent = CHLOROFORM-D  
 Temp\_get = 21.5[dc]  
 Spin\_get = 14[Hz]  
 Probe\_id = 2564



Compound 8b: <sup>13</sup>C-NMR

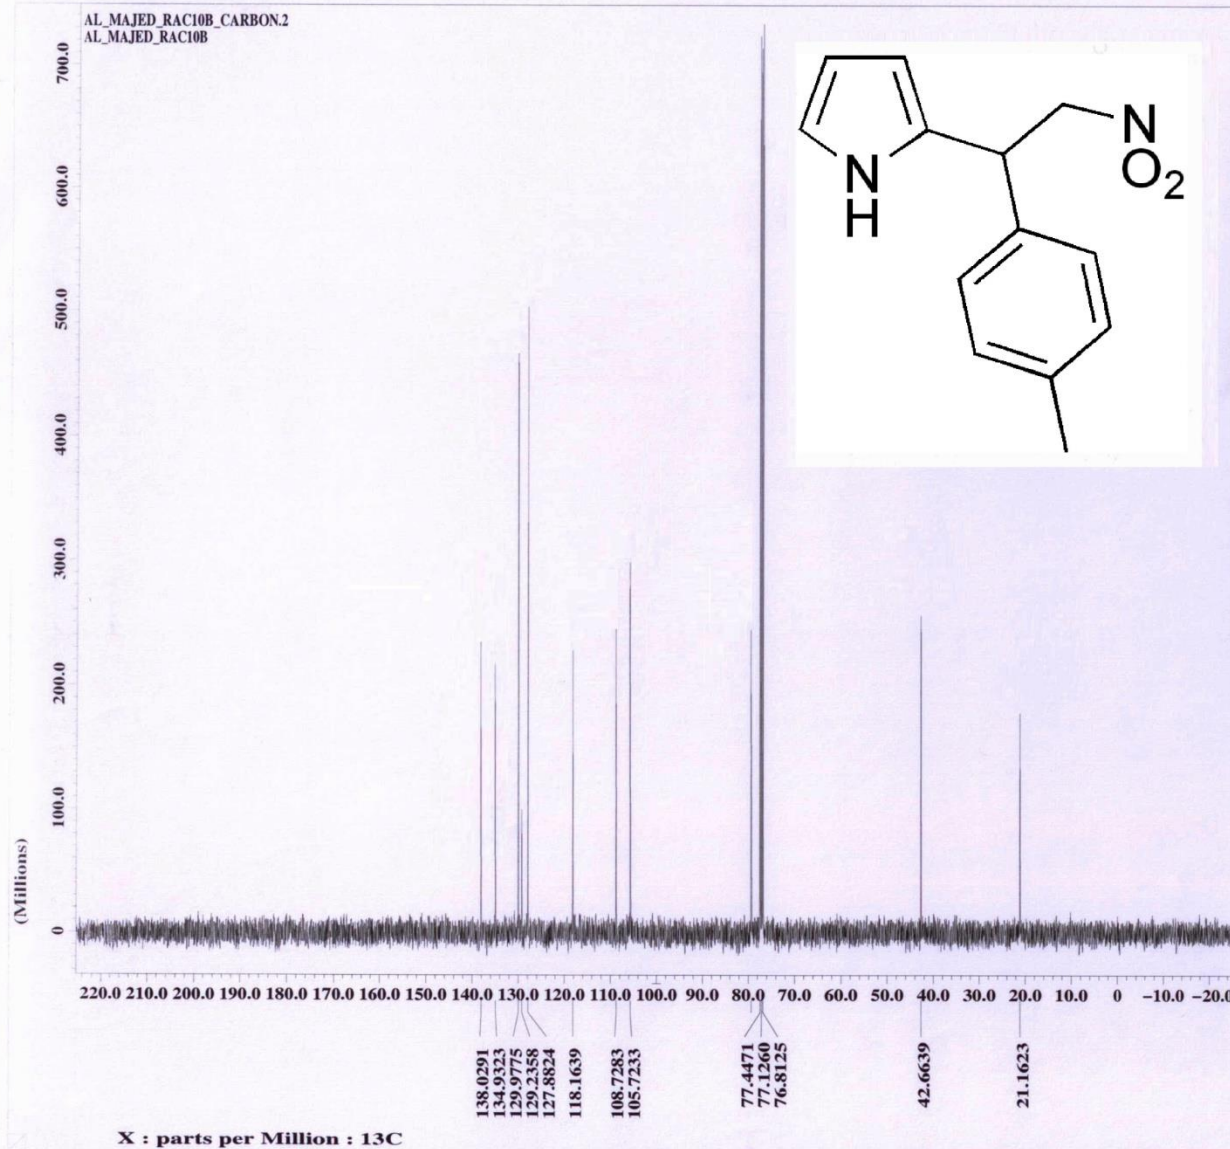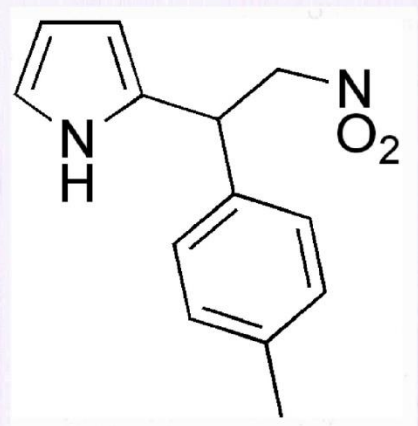

**JEOL**

---- ACQUISITION PARAMETERS ----  
 File Name = AL\_MAJED\_RAC10B\_CARBON  
 Author = DR. M. MARASHDAH  
 Sample ID = AL\_MAJED\_RAC10B  
 Content = AL\_MAJED\_RAC10B  
 Creation Date = 26-JAN-2013 12:50:42  
 Revision Date = 26-JAN-2013 13:56:37  
 Spec Site = ECP400  
 Spec Type = DELTA\_NMR  
 Data Format = 1D\_COMPLEX  
 Dimensions = X  
 Dim Title = 13C  
 Dim Size = 32768  
 Dim Units = [ppm]  
 Experiment = single\_pulse\_dec  
 Field\_strength = 9.389766[T]  
 X\_domain = 13C  
 X\_freq = 100.53535686[MHz]  
 X\_offset = 100[ppm]  
 X\_sweep = 25.18891688[kHz]  
 X\_points = 32768  
 X\_resolution = 0.7687282[Hz]  
 Recvr\_gain = 29  
 Filter\_mode = BUTTERWORTH  
 X\_prescans = 4  
 Scans = 184  
 Irr\_domain = 1H  
 Irr\_offset = 5.0[ppm]  
 Irr\_noise = WALTZ  
 Irr\_pwidth = 50[us]  
 Relaxation\_delay = 1[s]  
 Solvent = CHLOROFORM-D  
 Temp\_get = 22.2[dc]  
 Spin\_get = 14[Hz]  
 Probe\_id = 2564

Compound 9b: <sup>1</sup>H-NMR

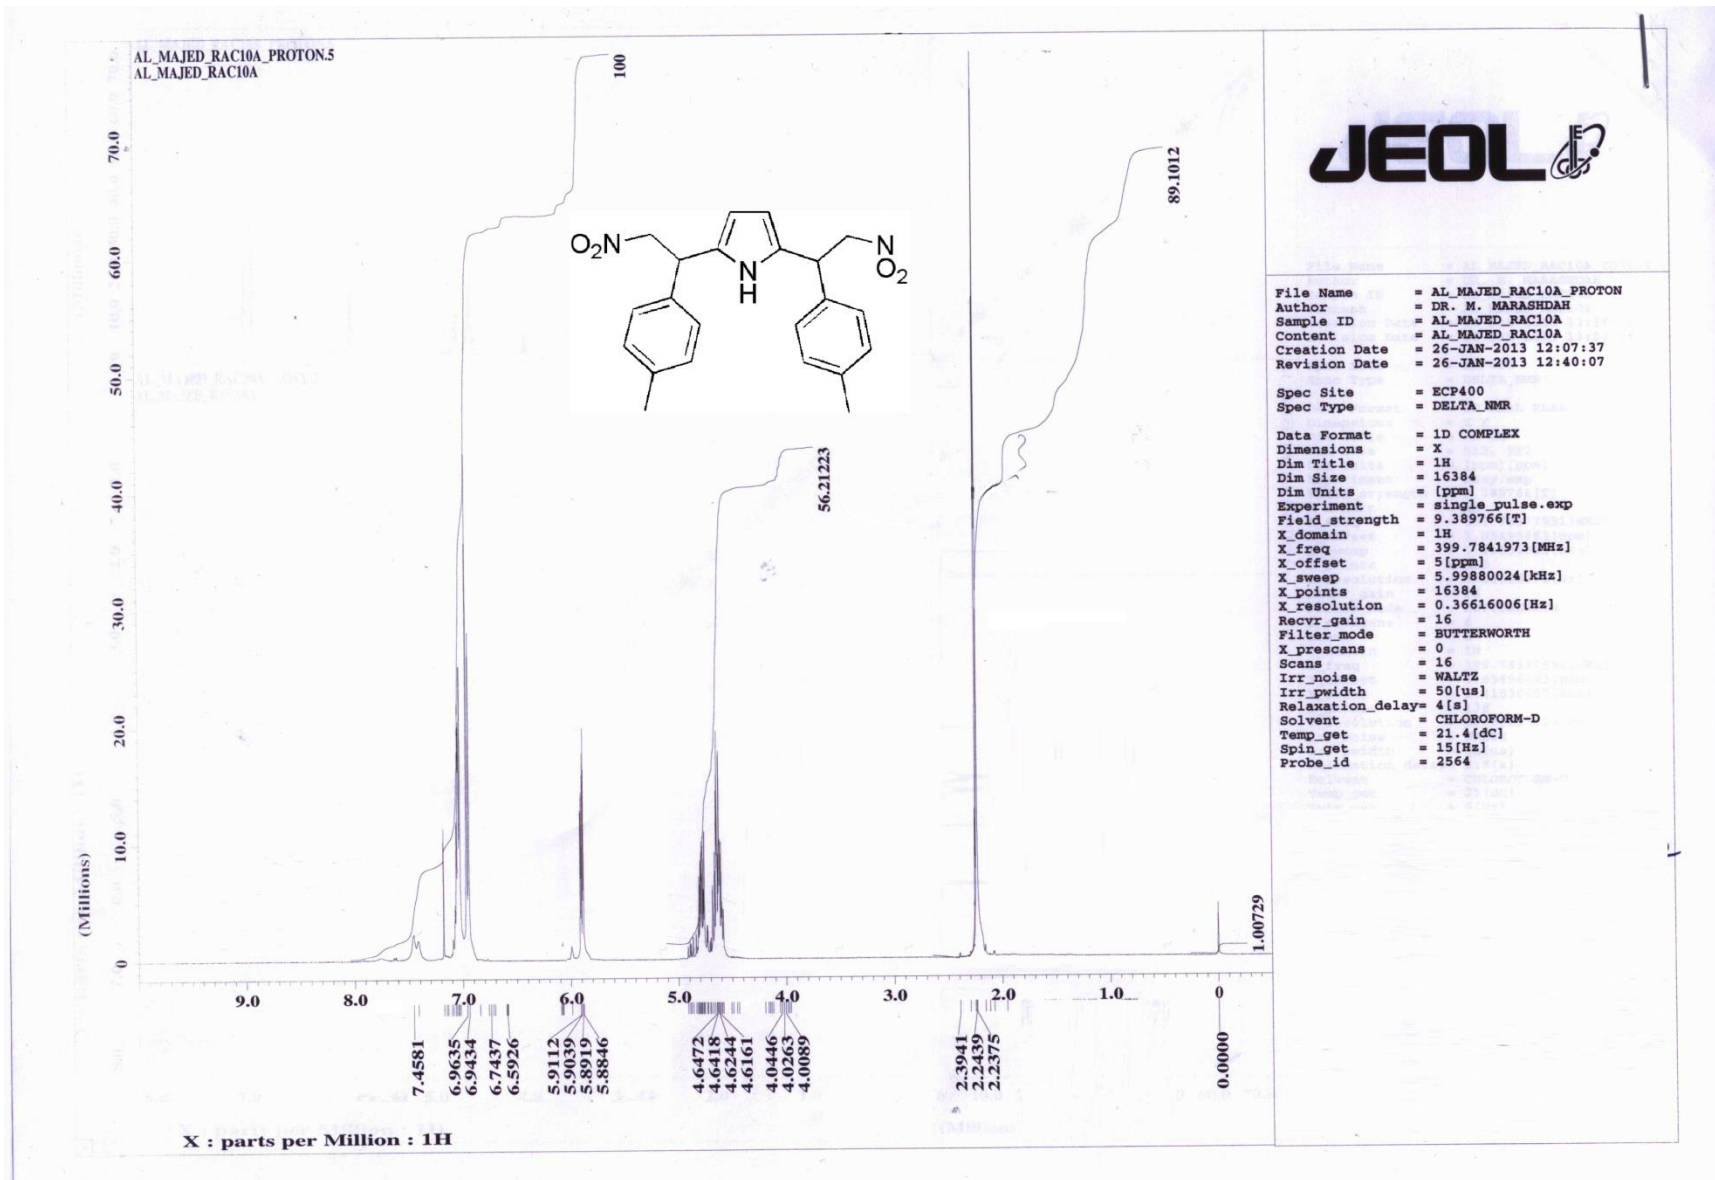

Compound 9b: <sup>13</sup>C-NMR

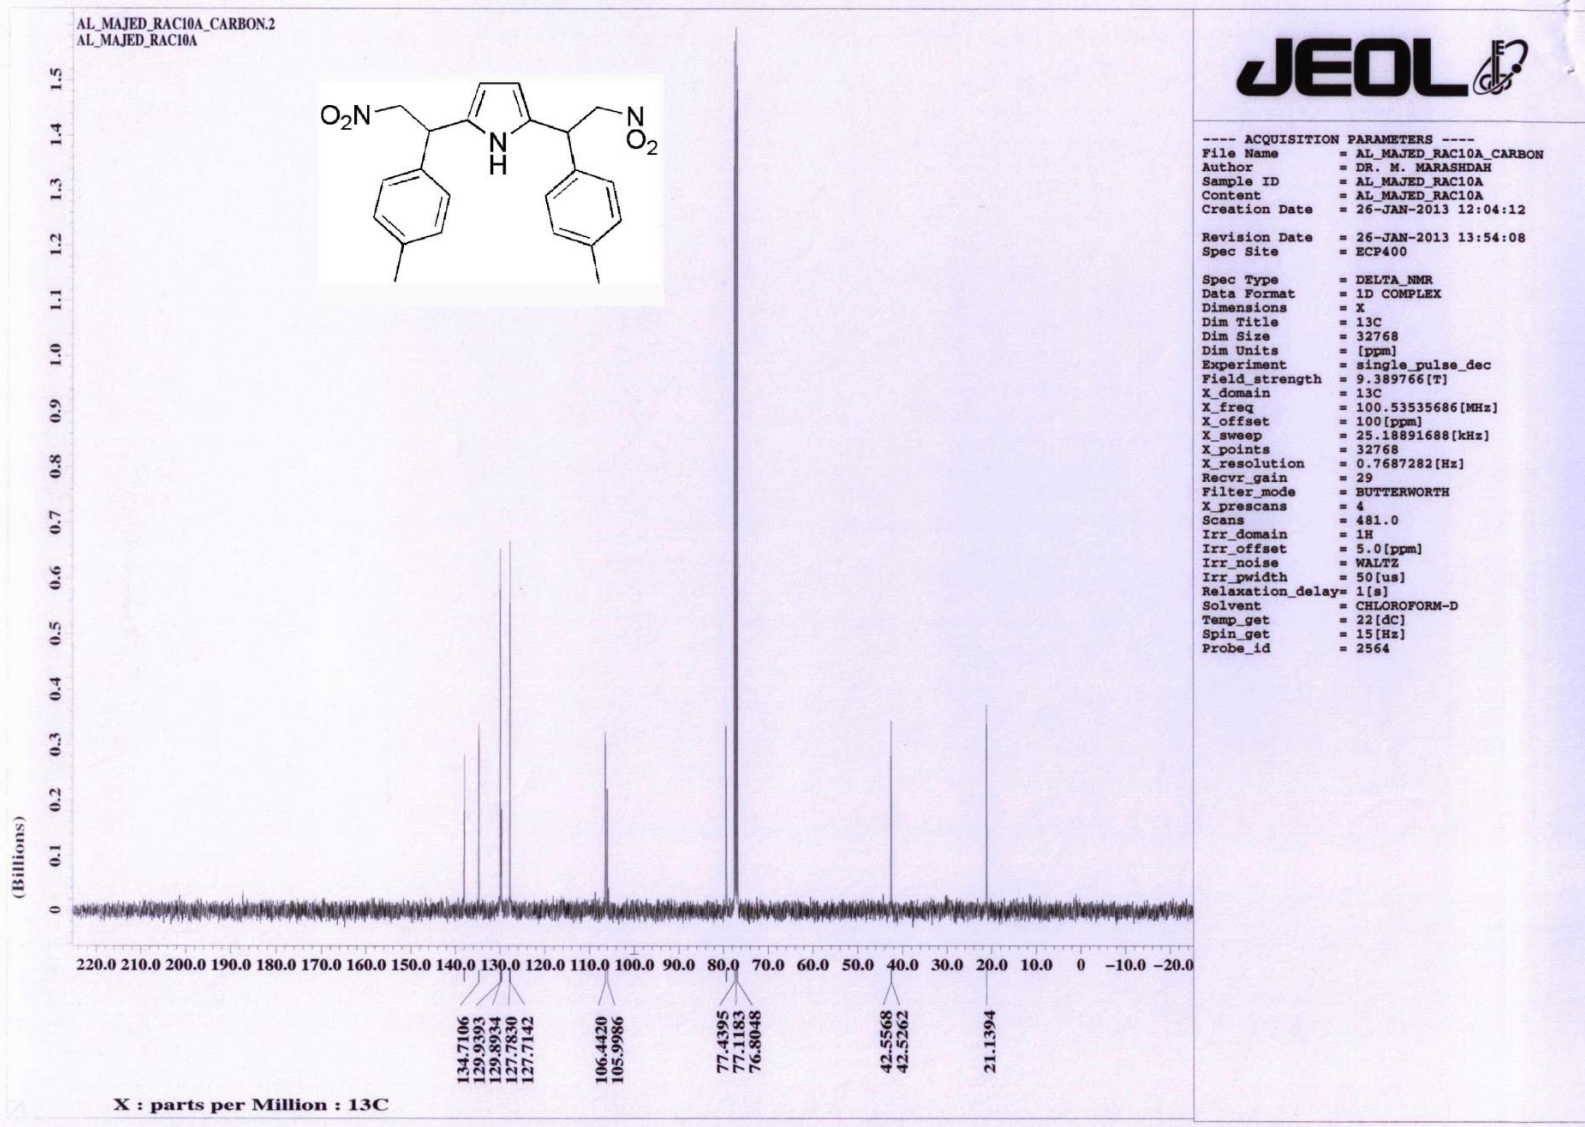

Compound 8c: <sup>1</sup>H-NMR

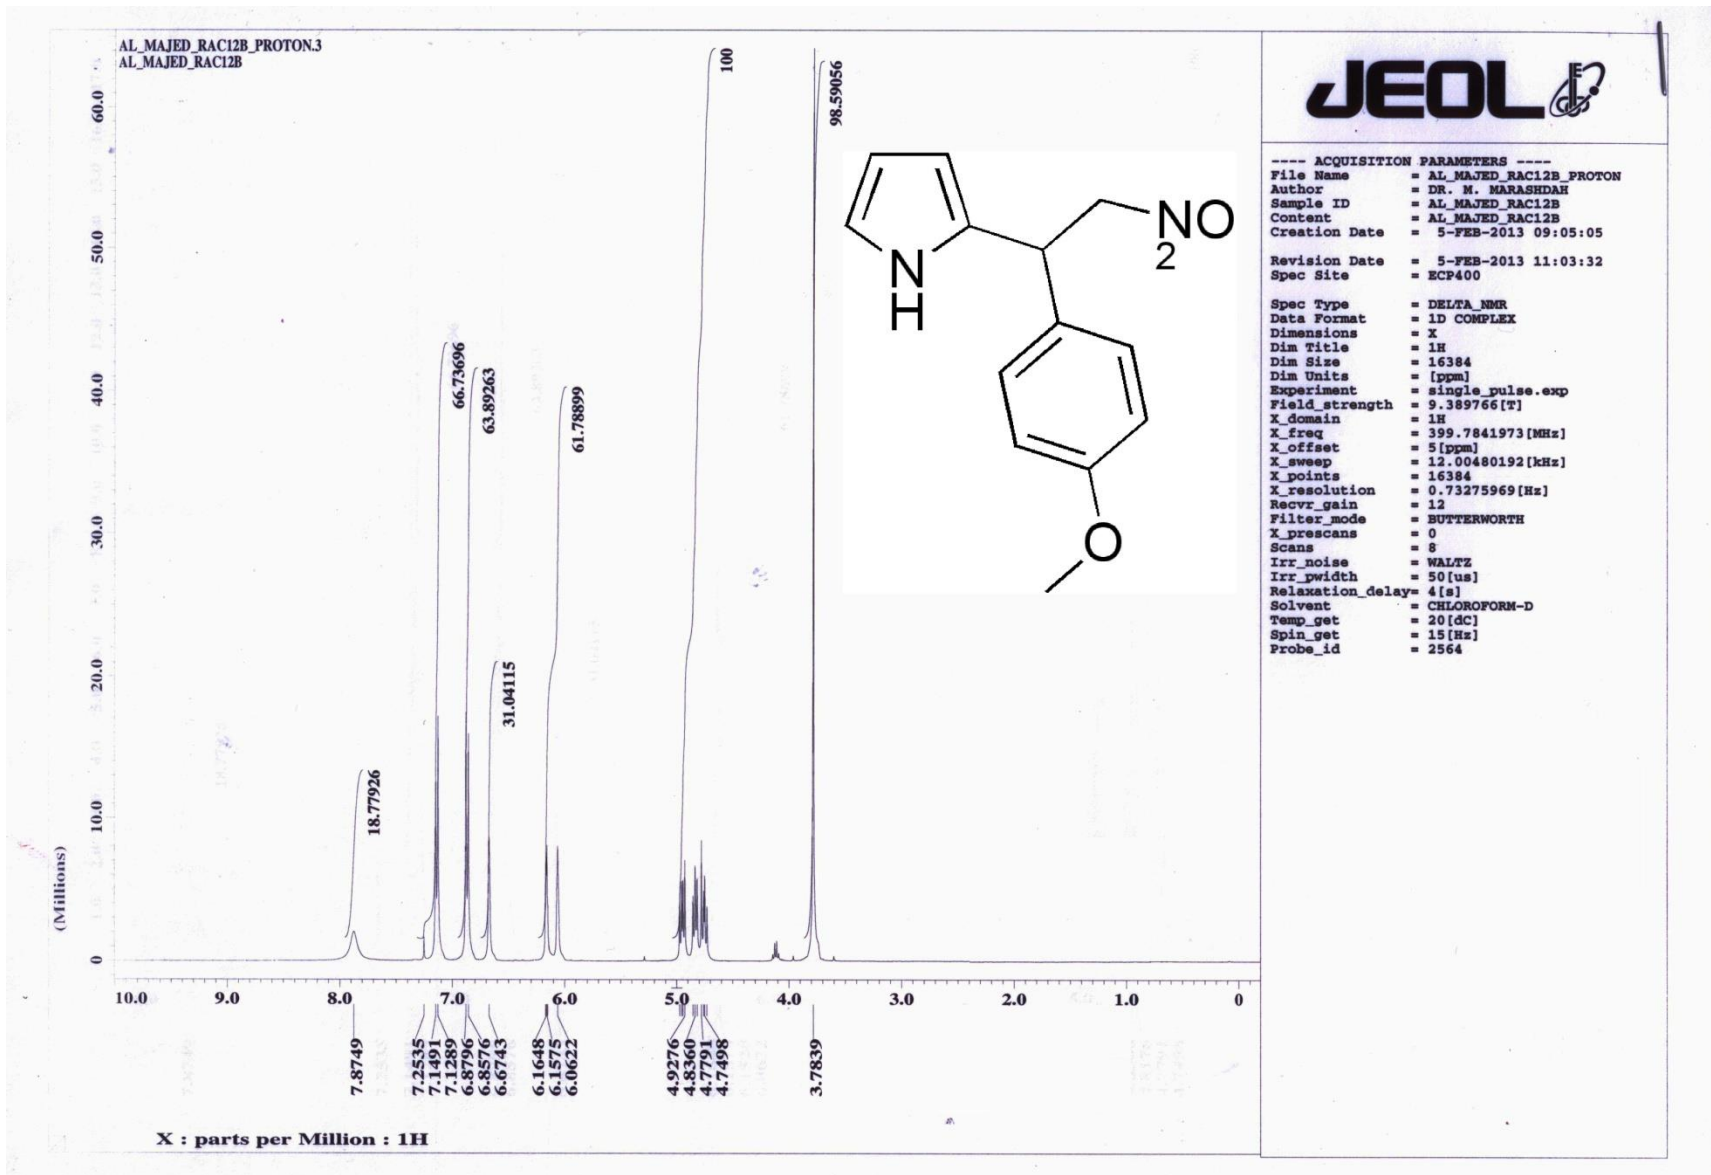

Compound 8c: <sup>13</sup>C-NMR

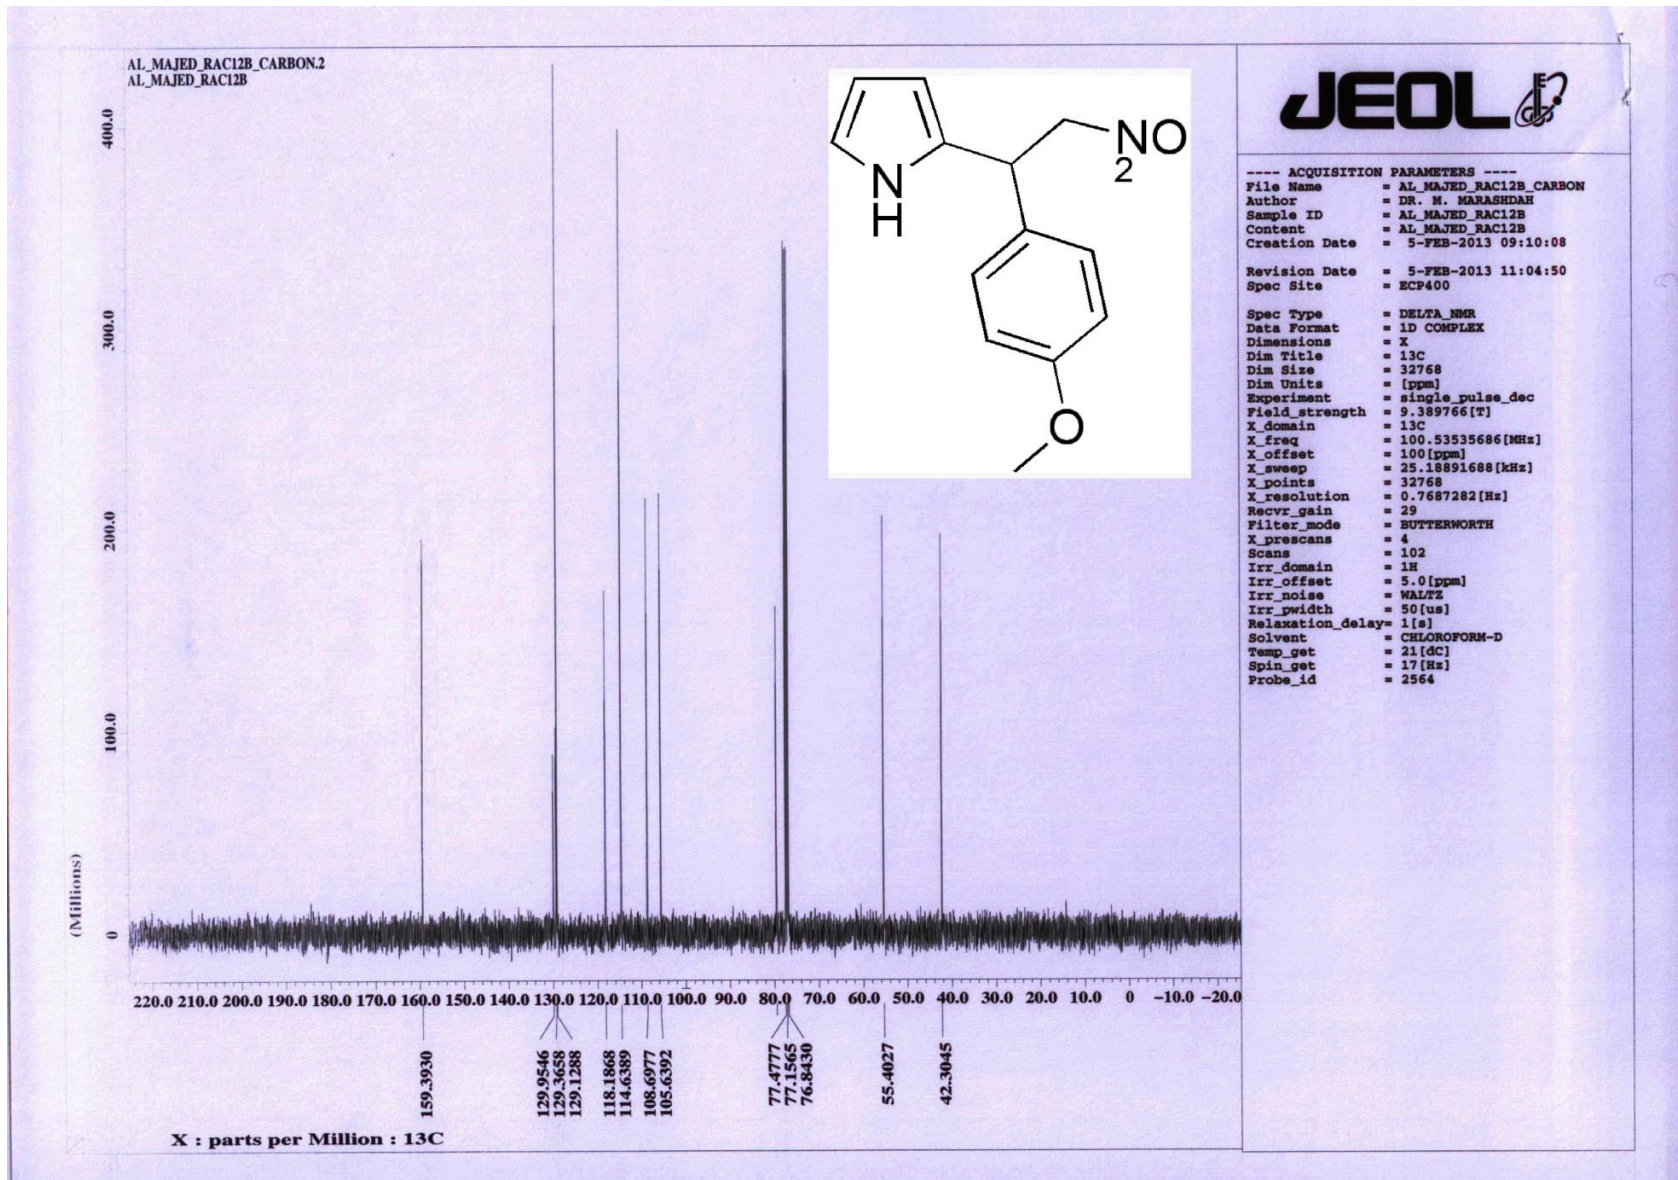

Compound 9c: <sup>1</sup>H-NMR

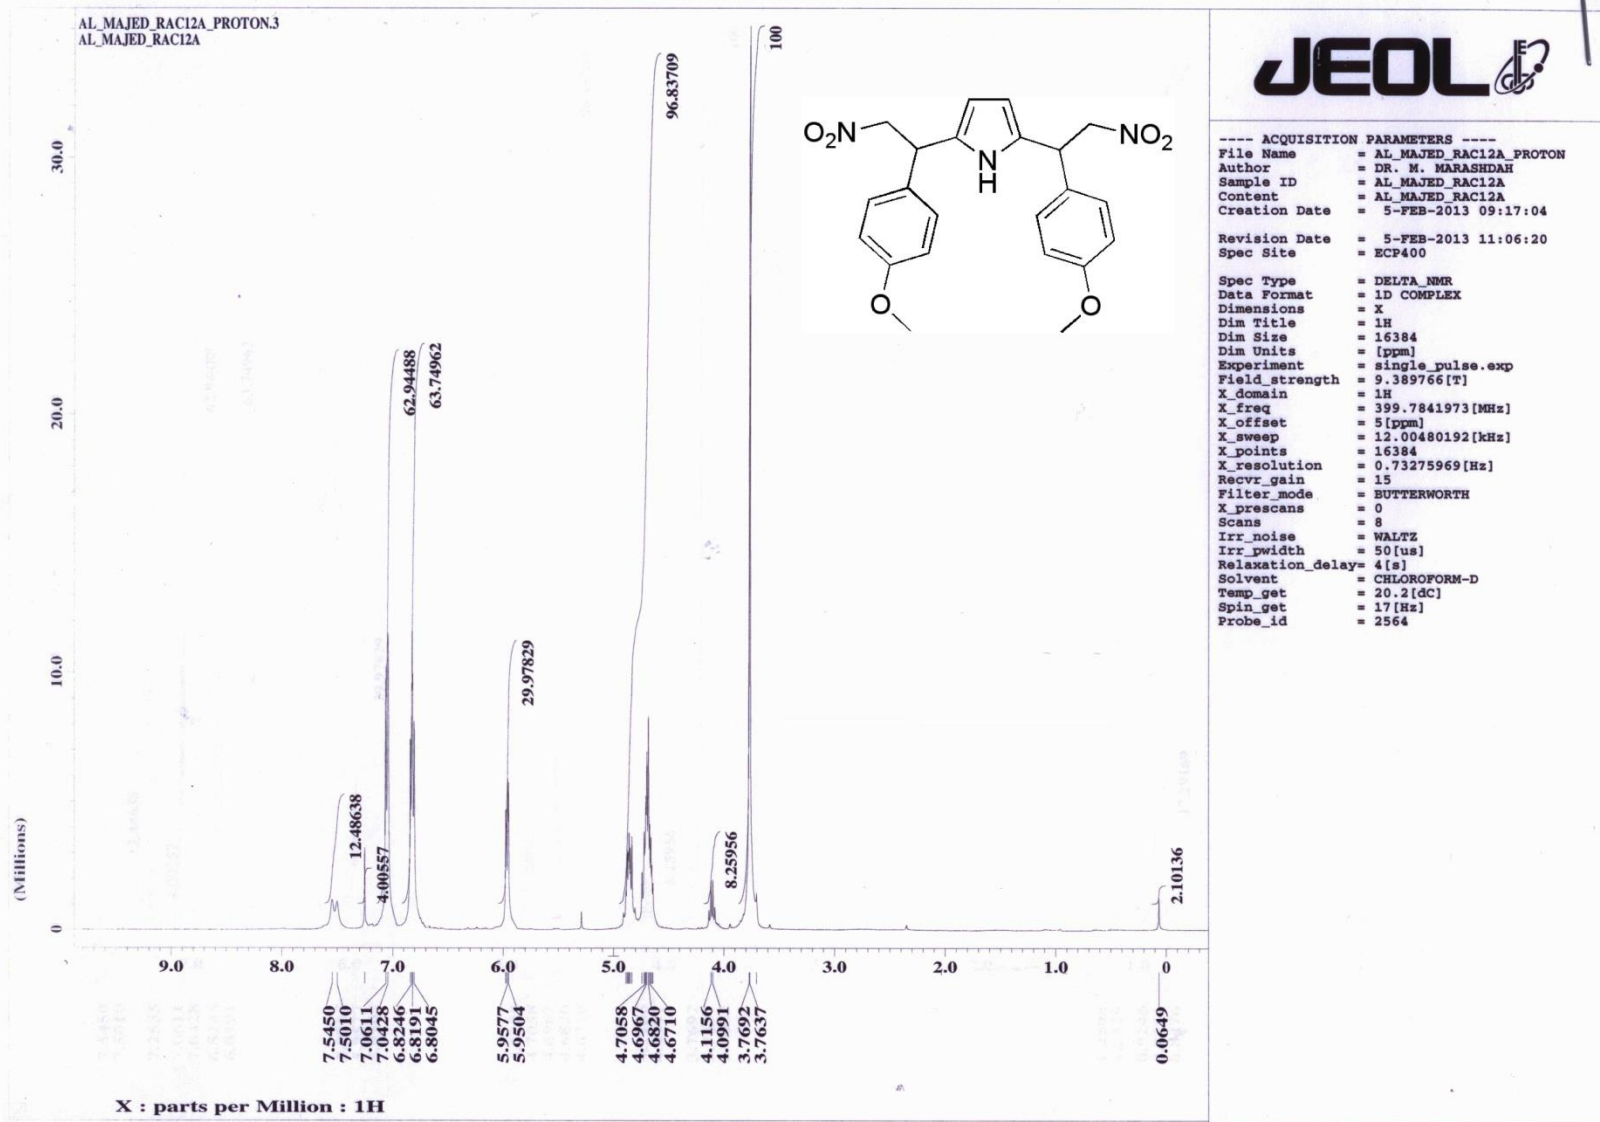

Compound 9c: <sup>13</sup>C-NMR

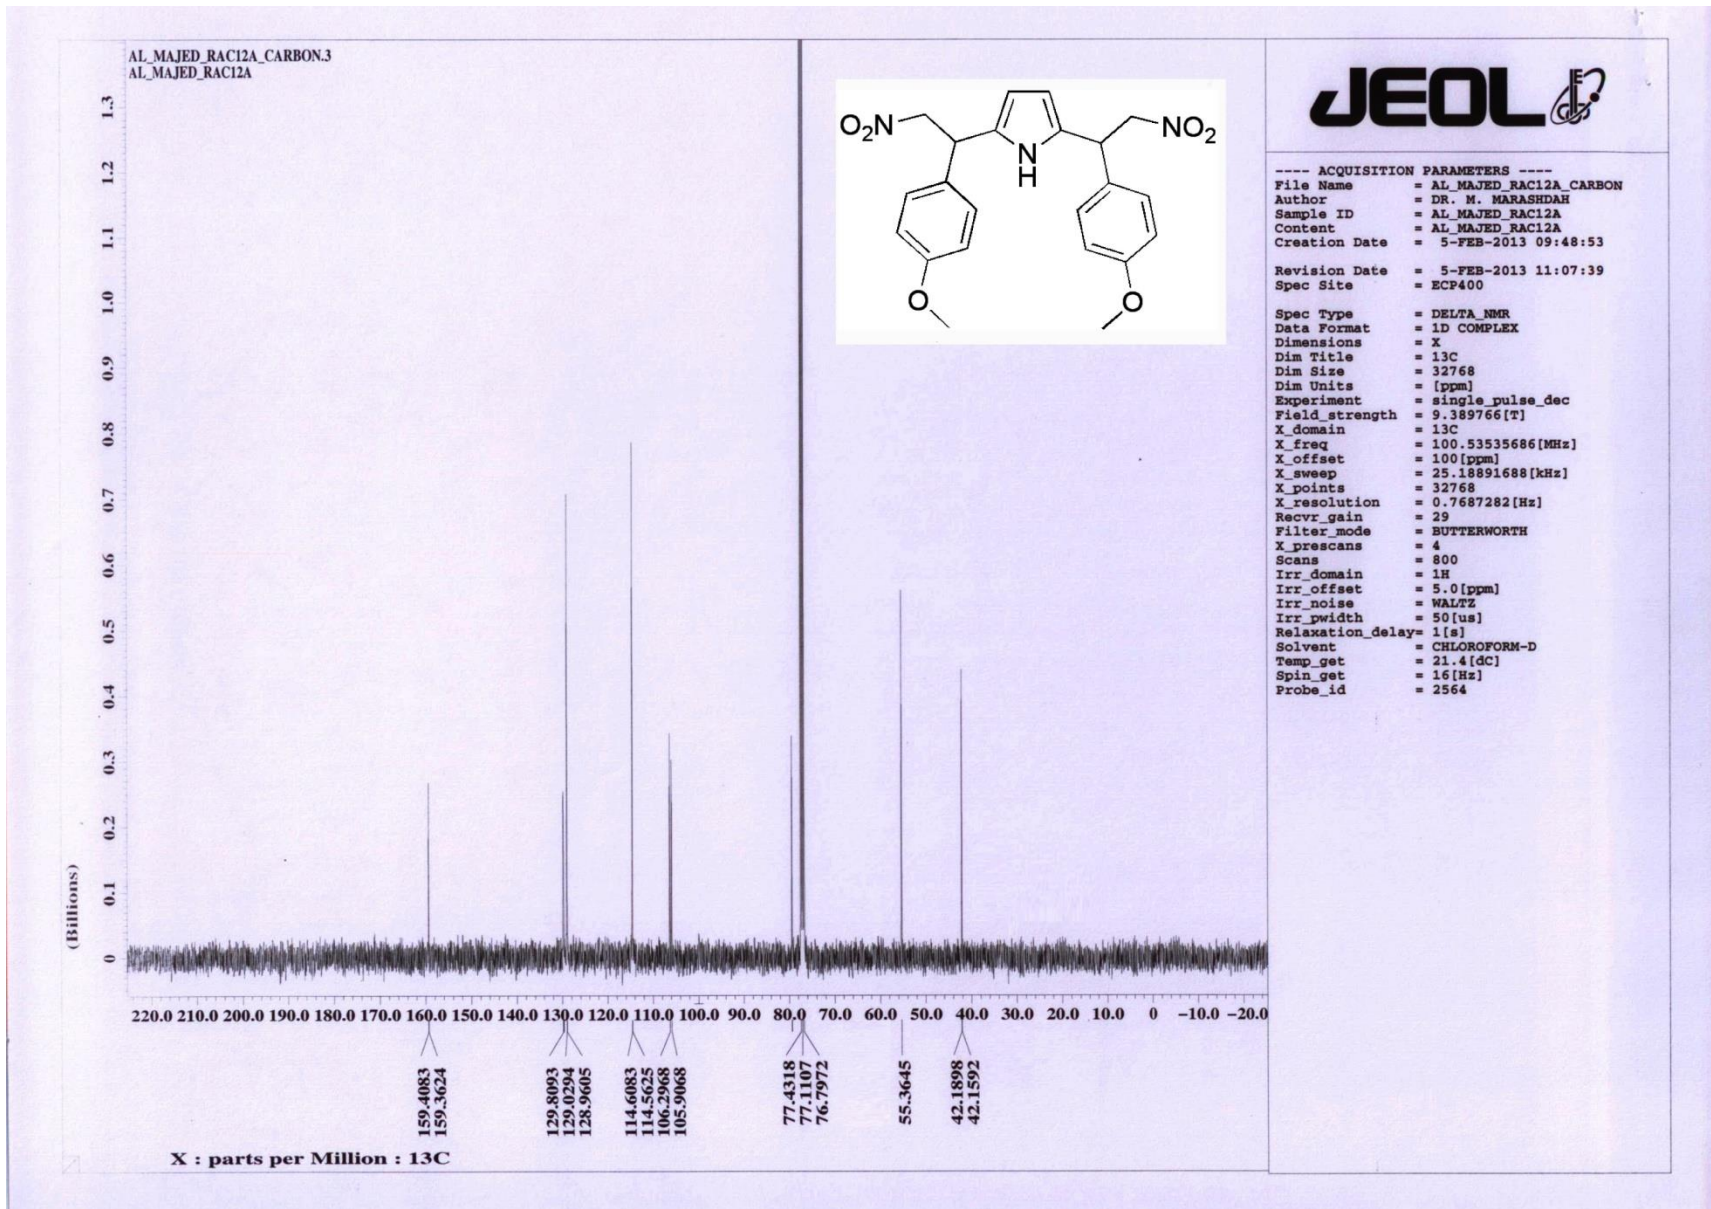

Compound 8d: <sup>1</sup>H-NMR

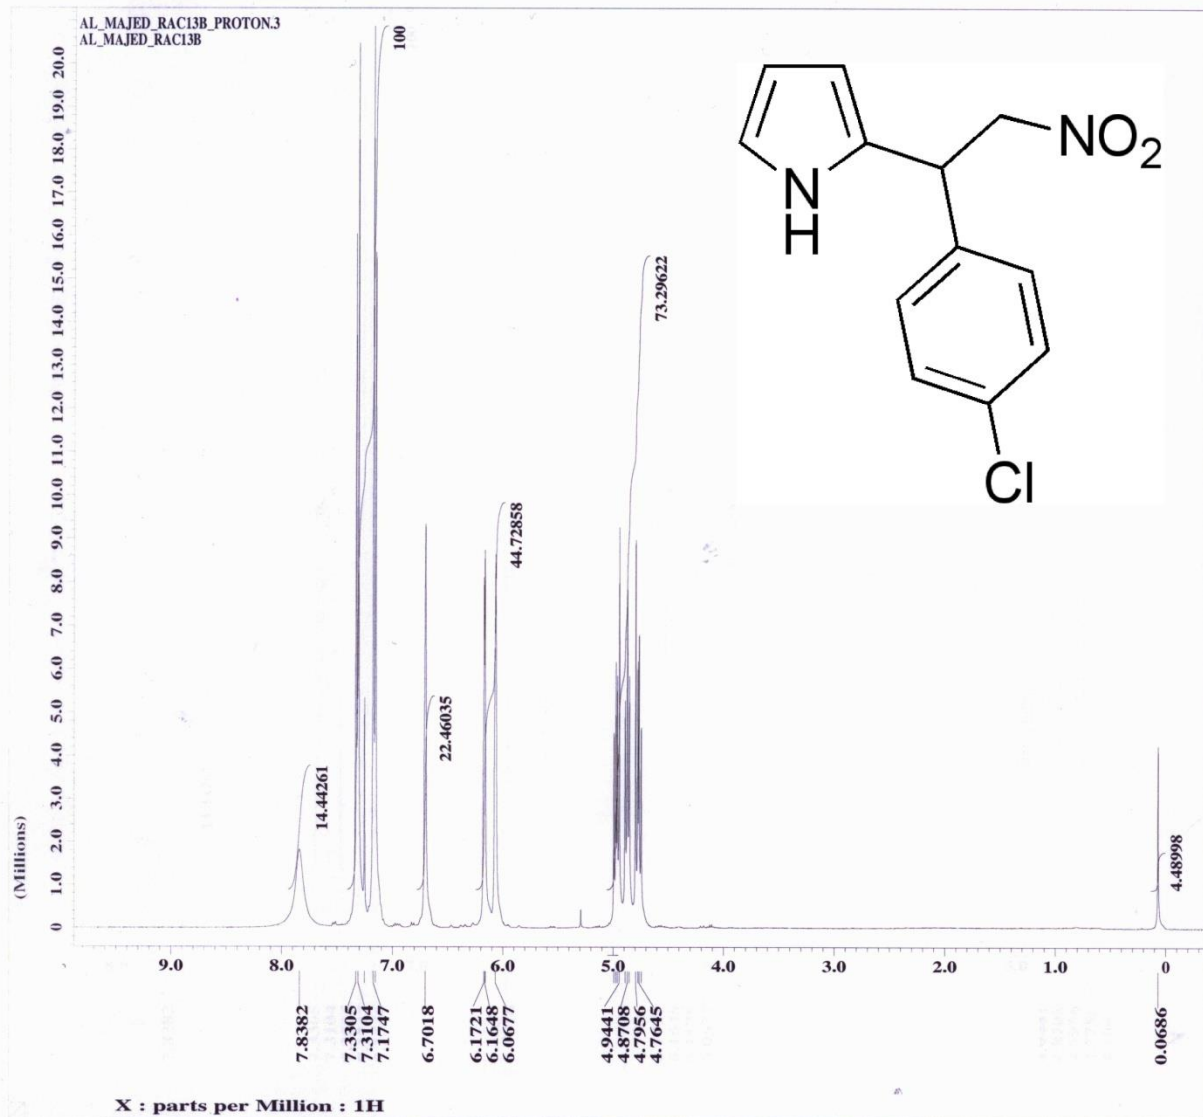

**JEOL**

---- ACQUISITION PARAMETERS ----  
 File Name = AL\_MAJED\_RAC13B\_PROTON  
 Author = DR. M. MARASHDAH  
 Sample ID = AL\_MAJED\_RAC13B  
 Content = AL\_MAJED\_RAC13B  
 Creation Date = 6-FEB-2013 11:18:49  
 Revision Date = 6-FEB-2013 12:12:33  
 Spec Site = ECF400  
 Spec Type = DELTA\_NMR  
 Data Format = 1D\_COMPLEX  
 Dimensions = X  
 Dim Title = 1H  
 Dim Size = 16384  
 Dim Units = [ppm]  
 Experiment = single\_pulse.exp  
 Field\_strength = 9.389766[T]  
 X\_domain = 1H  
 X\_freq = 399.7841973[MHz]  
 X\_offset = 5[ppm]  
 X\_sweep = 12.00480192[kHz]  
 X\_points = 16384  
 X\_resolution = 0.73275969[Hz]  
 Recvr\_gain = 15  
 Filter\_mode = BUTTERWORTH  
 X\_prescans = 0  
 Scans = 8  
 Irr\_noise = WALTZ  
 Irr\_width = 50[us]  
 Relaxation\_delay = 4[s]  
 Solvent = CHLOROFORM-D  
 Temp\_get = 20.5[DC]  
 Spin\_get = 14[Hz]  
 Probe\_id = 2564



Compound 8d: <sup>13</sup>C-NMR

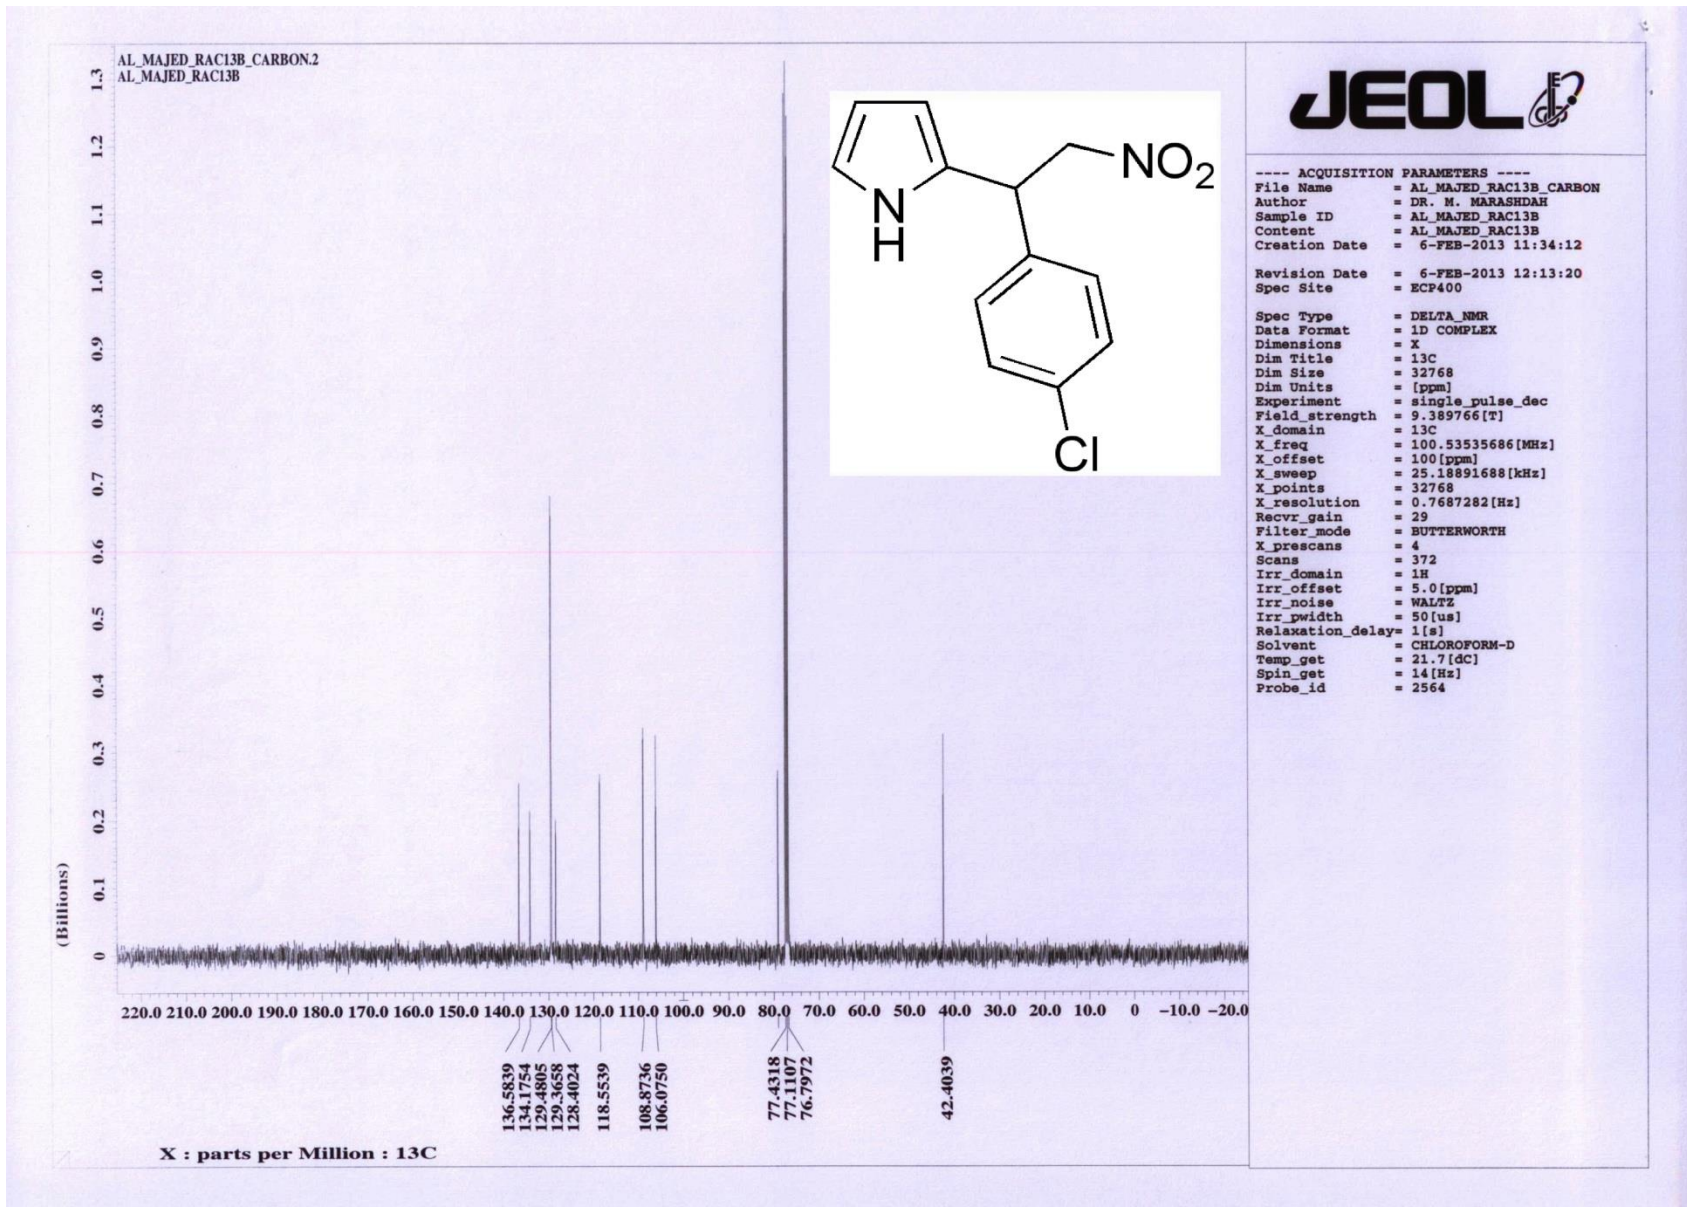

Compound 9d: <sup>1</sup>H-NMR

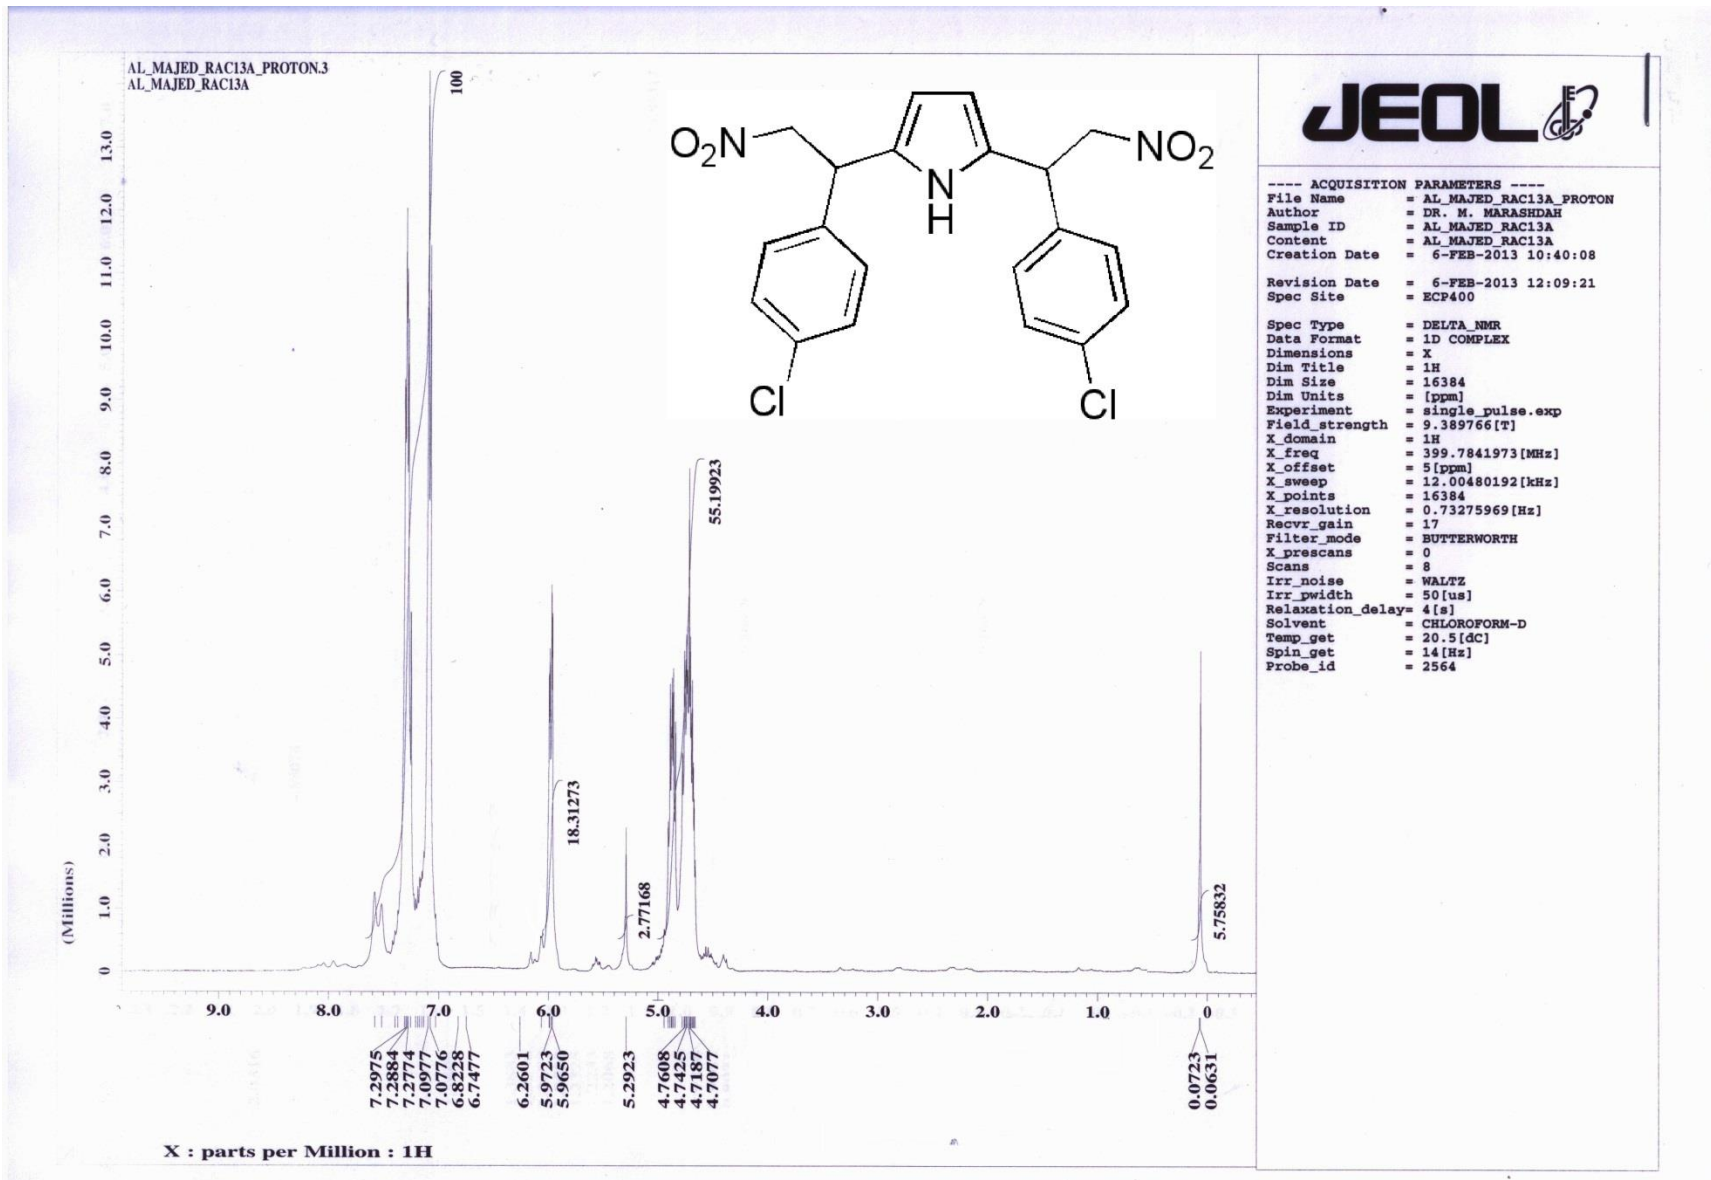

Compound 9d: <sup>13</sup>C-NMR

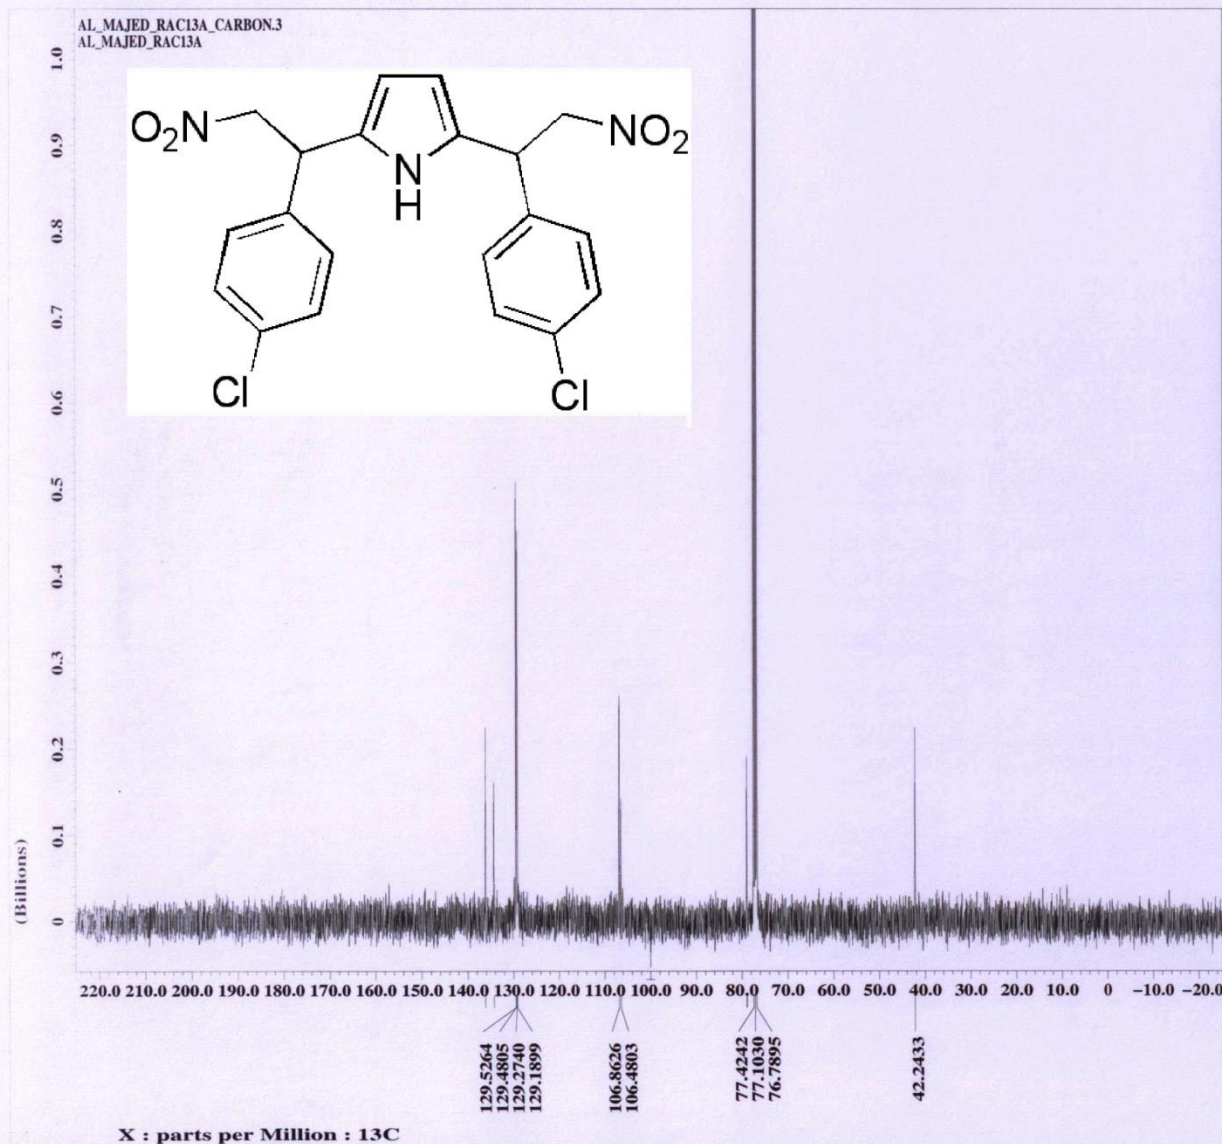

**JEOL**

---- ACQUISITION PARAMETERS ----  
 File Name = AL\_MAJED\_RAC13A\_CARBON  
 Author = DR. M. MARASHDAH  
 Sample ID = AL\_MAJED\_RAC13A  
 Content = AL\_MAJED\_RAC13A  
 Creation Date = 6-FEB-2013 11:11:57  
 Revision Date = 6-FEB-2013 12:11:12  
 Spec Site = ECP400  
 Spec Type = DELTA\_NMR  
 Data Format = 1D\_COMPLEX  
 Dimensions = X  
 Dim Title = 13C  
 Dim Size = 32768  
 Dim Units = [ppm]  
 Experiment = single\_pulse\_dec  
 Field\_strength = 9.389766[T]  
 X\_domain = 13C  
 X\_freq = 100.53535686[MHz]  
 X\_offset = 100[ppm]  
 X\_sweep = 25.18891688[kHz]  
 X\_points = 32768  
 X\_resolution = 0.7687282[Hz]  
 Recvr\_gain = 29  
 Filter\_mode = BUTTERWORTH  
 X\_prescans = 4  
 Scans = 800  
 Irr\_domain = 1H  
 Irr\_offset = 5.0[ppm]  
 Irr\_noise = WALTZ  
 Irr\_pwidth = 50[us]  
 Relaxation\_delay = 1[s]  
 Solvent = CHLOROFORM-D  
 Temp\_get = 21.5[dC]  
 Spin\_get = 14[Hz]  
 Probe\_id = 2564

Compound 8e: <sup>1</sup>H-NMR

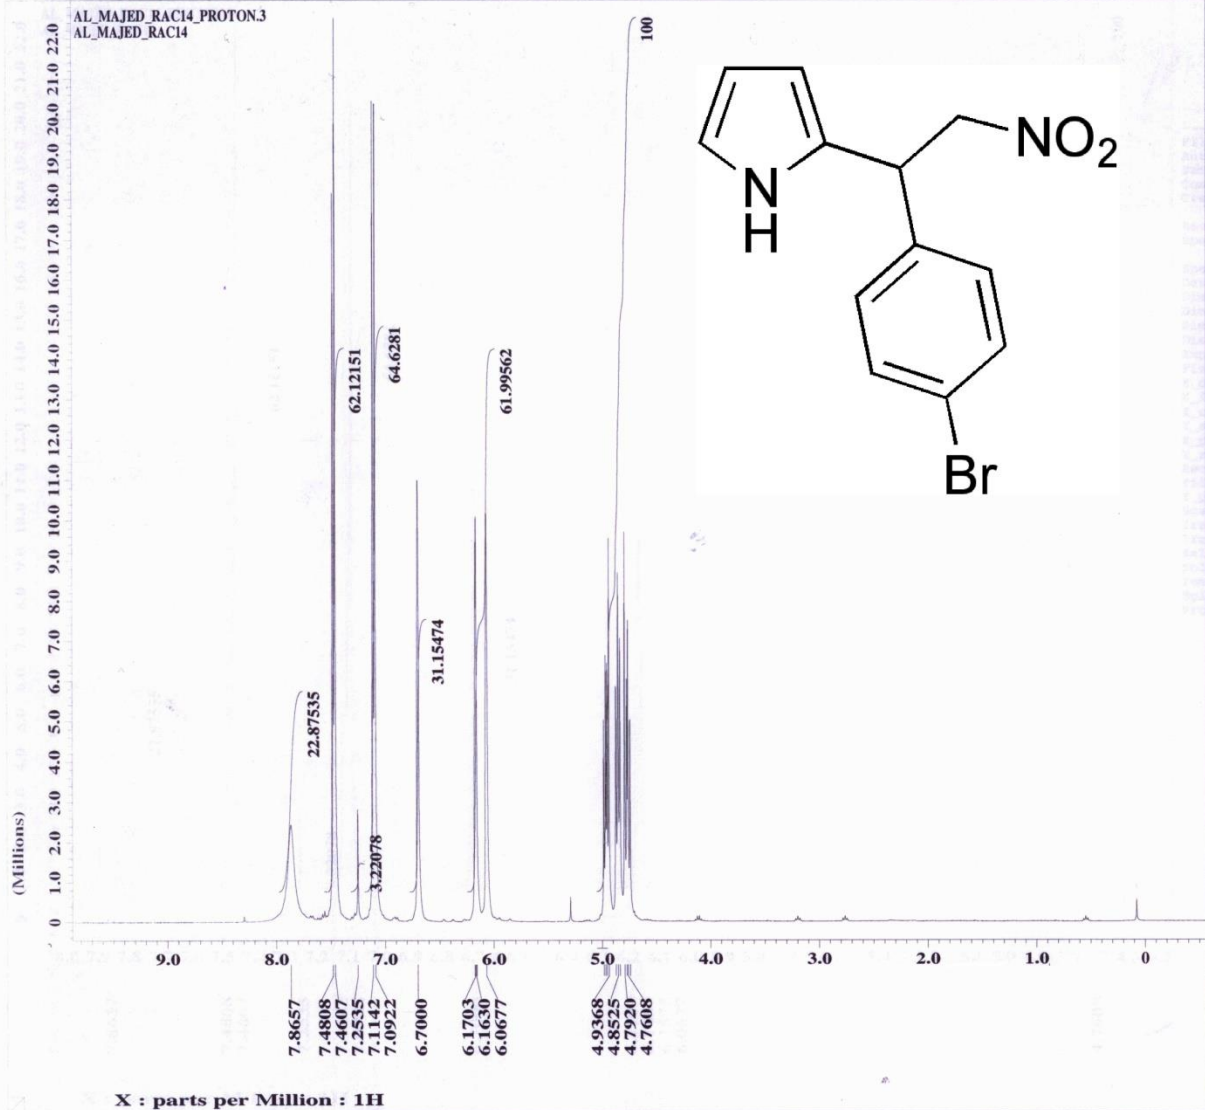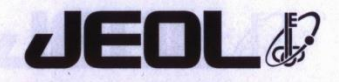

---- ACQUISITION PARAMETERS ----  
 File Name = AL\_MAJED\_RAC14\_PROTON.  
 Author = DR. M. MARASHDAH  
 Sample ID = AL\_MAJED\_RAC14  
 Content = AL\_MAJED\_RAC14  
 Creation Date = 4-FEB-2013 09:45:33  
 Revision Date = 4-FEB-2013 10:18:57  
 Spec Site = ECP400  
 Spec Type = DELTA\_NMR  
 Data Format = 1D\_COMPLEX  
 Dimensions = X  
 Dim Title = 1H  
 Dim Size = 16384  
 Dim Units = [ppm]  
 Experiment = single\_pulse.exp  
 Field\_strength = 9.389766[T]  
 X\_domain = 1H  
 X\_freq = 399.7841973[MHz]  
 X\_offset = 5[ppm]  
 X\_sweep = 12.00480192[kHz]  
 X\_points = 16384  
 X\_resolution = 0.73275969[Hz]  
 Recvr\_gain = 14  
 Filter\_mode = BUTTERWORTH  
 X\_prescans = 0  
 Scans = 8  
 Irr\_noise = WALTZ  
 Irr\_pwidth = 50[us]  
 Relaxation\_delay = 4[s]  
 Solvent = CHLOROFORM-D  
 Temp\_get = 19.6[dc]  
 Spin\_get = 14[Hz]  
 Probe\_id = 2564

Compound 8e: <sup>13</sup>C-NMR

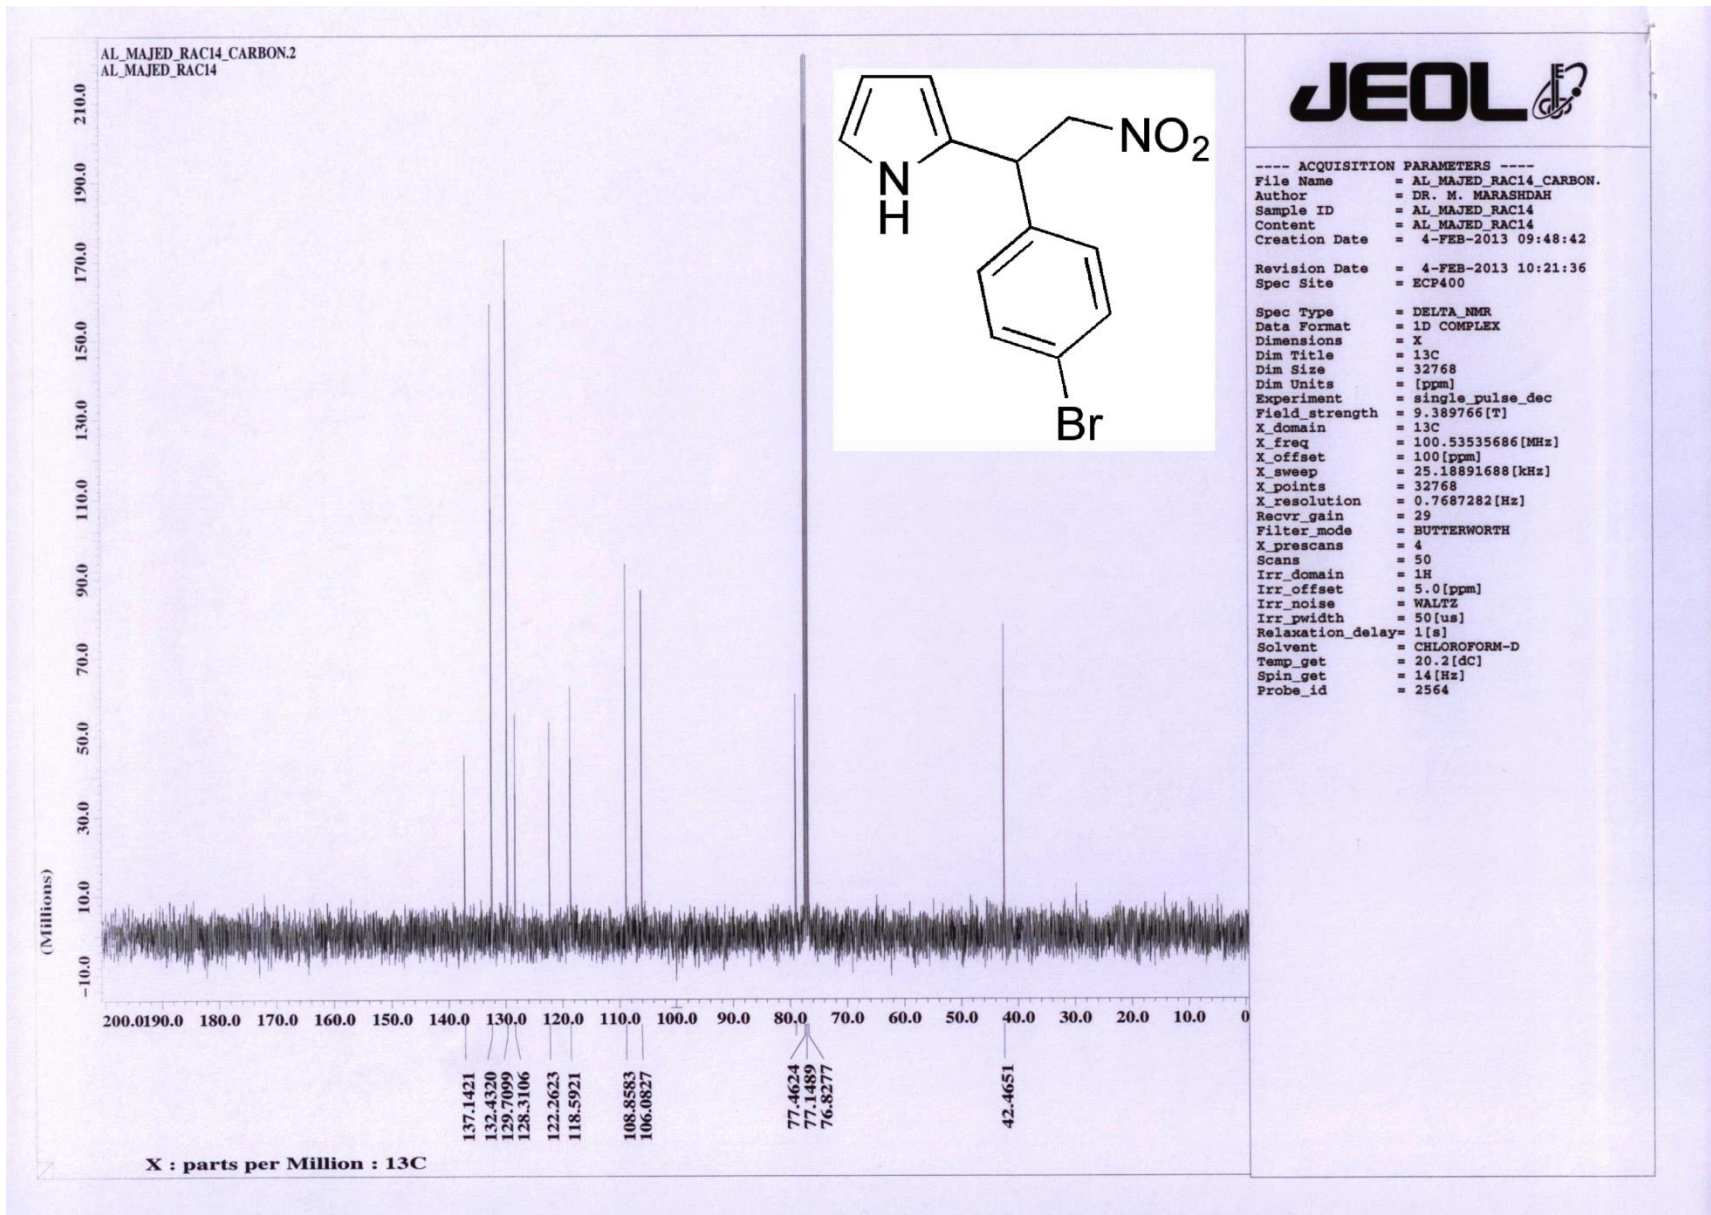

Compound 8f: <sup>1</sup>H-NMR

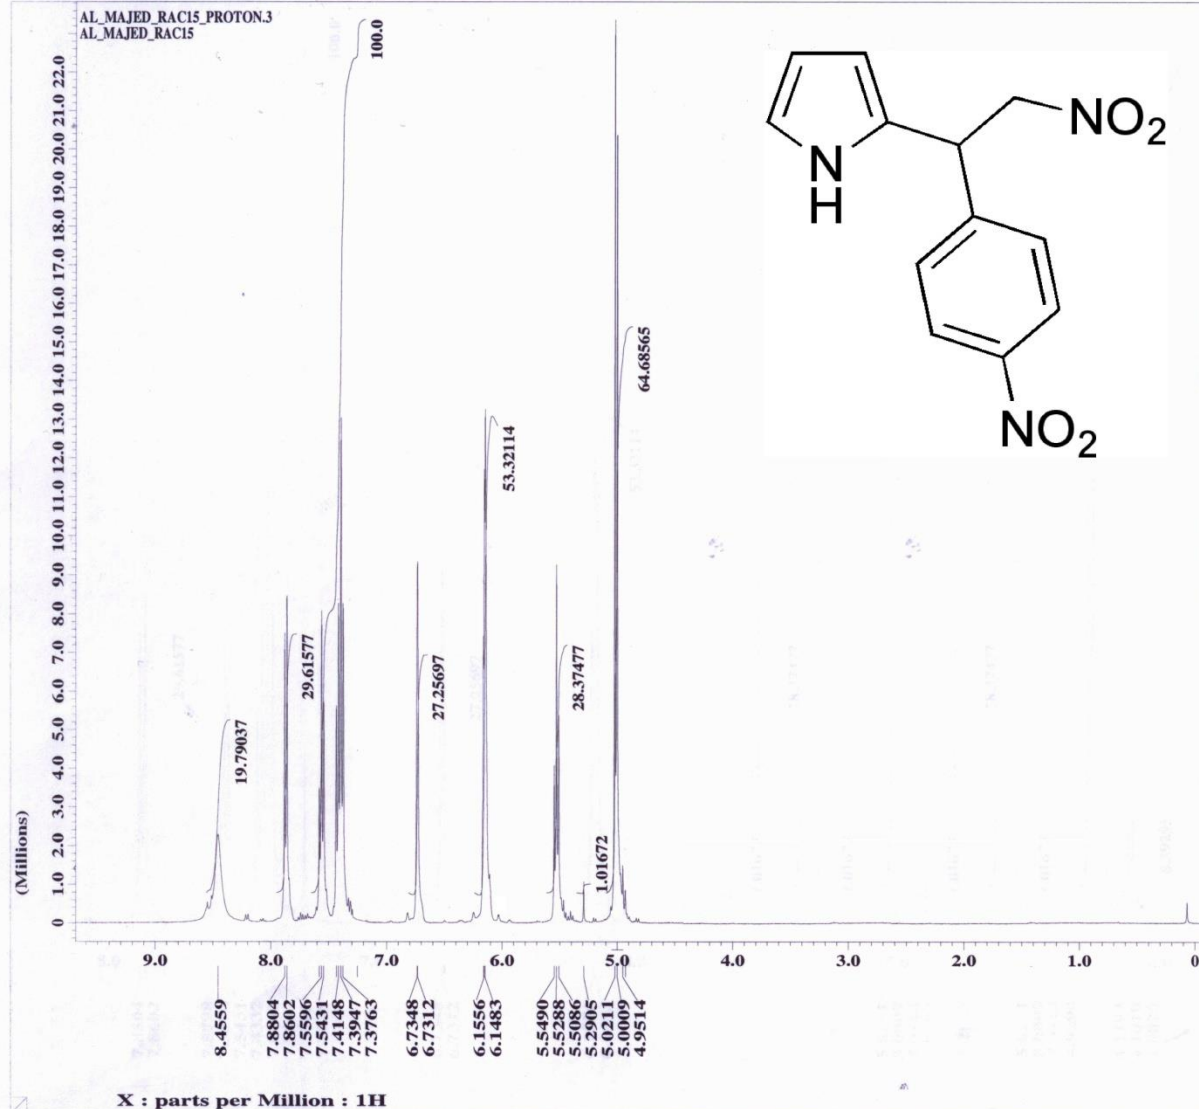

**JEOL**

---- ACQUISITION PARAMETERS ----

File Name = AL\_MAJED\_RAC15\_PROTON.  
 Author = DR. M. MARASHDAH  
 Sample ID = AL\_MAJED\_RAC15  
 Content = AL\_MAJED\_RAC15  
 Creation Date = 3-FEB-2013 10:34:30

Revision Date = 3-FEB-2013 11:22:24  
 Spec Site = ECP400

Spec Type = DELTA\_NMR  
 Data Format = 1D\_COMPLEX  
 Dimensions = X  
 Dim Title = 1H  
 Dim Size = 16384  
 Dim Units = [ppm]  
 Experiment = single\_pulse.exp  
 Field\_strength = 9.389766[T]  
 X\_domain = 1H  
 X\_freq = 399.7841973[MHz]  
 X\_offset = 5[ppm]  
 X\_sweep = 12.00480192[kHz]  
 X\_points = 16384  
 X\_resolution = 0.73275969[Hz]  
 Recvr\_gain = 15  
 Filter\_mode = BUTTERWORTH  
 X\_prescans = 0  
 Scans = 8  
 Irr\_noise = WALTZ  
 Irr\_pwidth = 50[us]  
 Relaxation\_delay = 4[s]  
 Solvent = CHLOROFORM-D  
 Temp\_get = 19.5[dc]  
 Spin\_get = 16[Hz]  
 Probe\_id = 2564

Compound 8f: <sup>13</sup>C-NMR

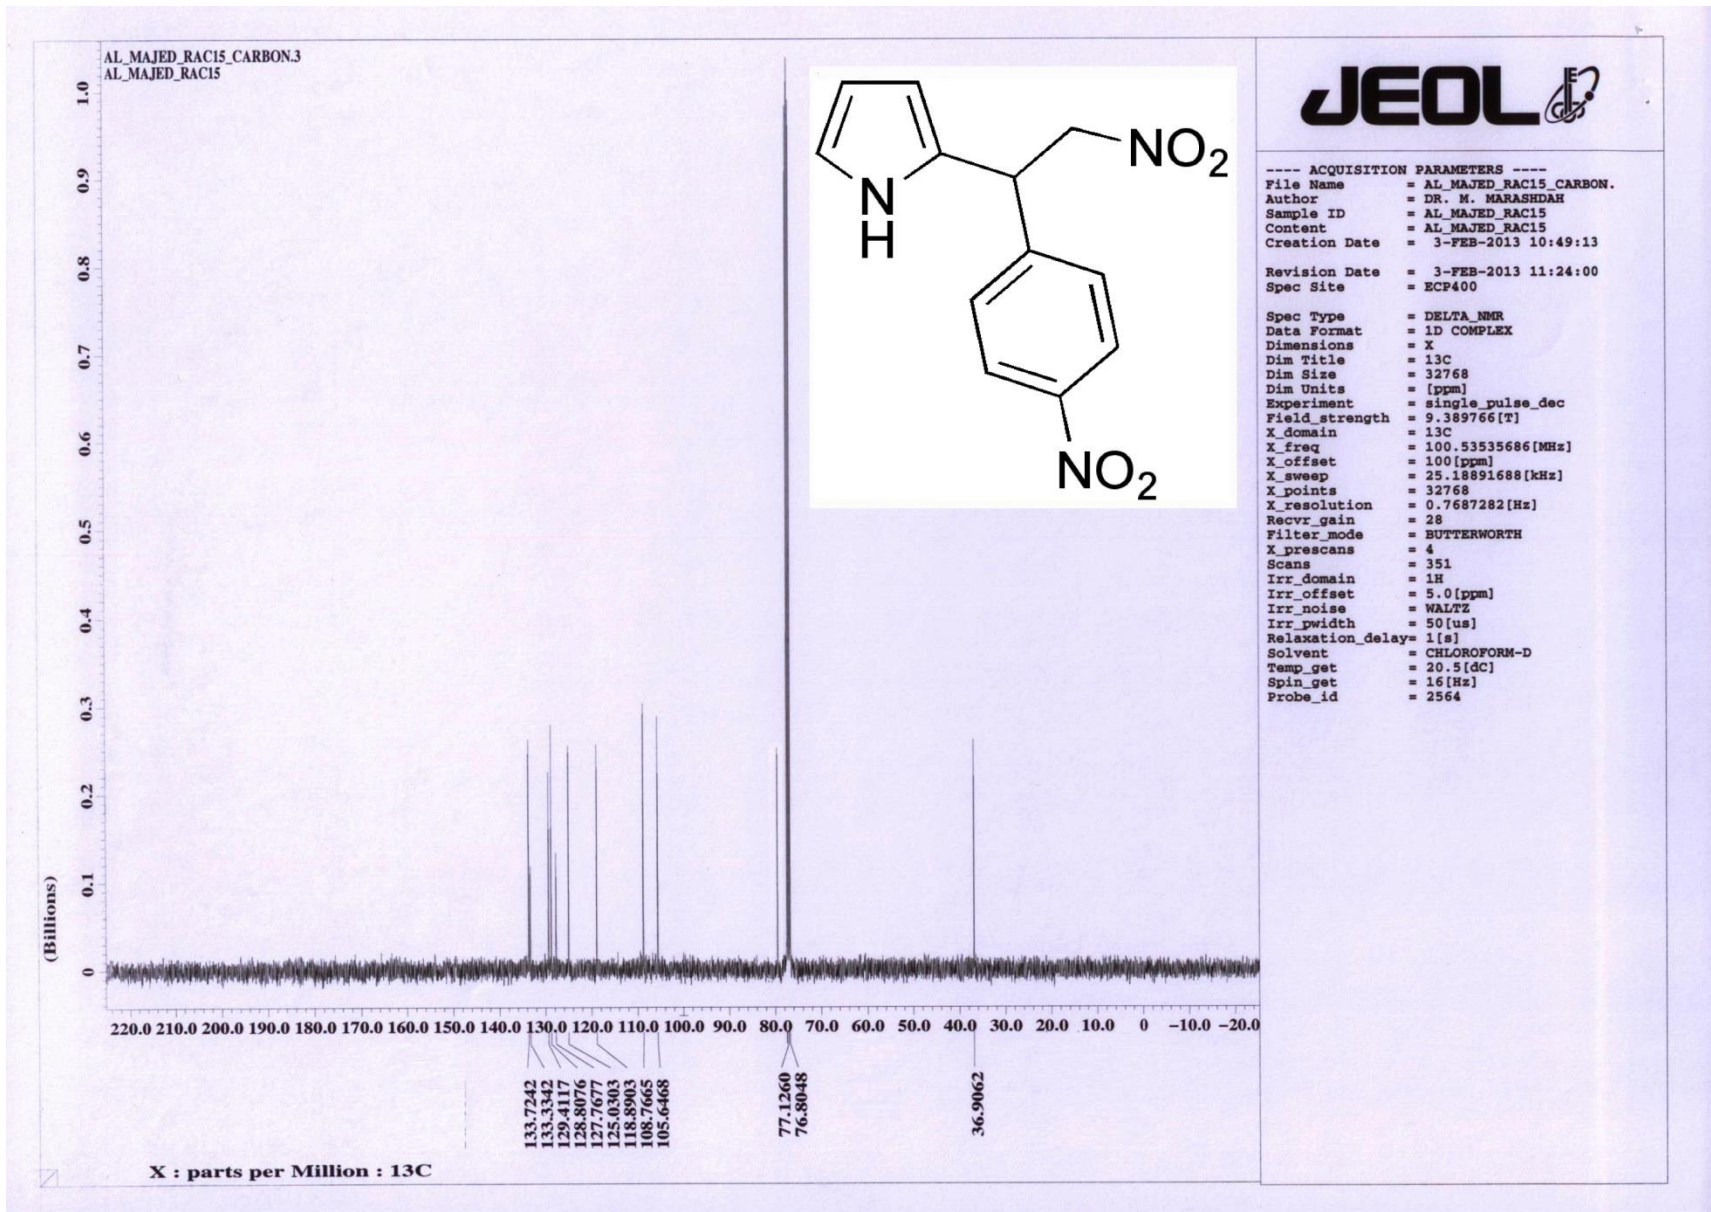

Compound 8g: <sup>1</sup>H-NMR

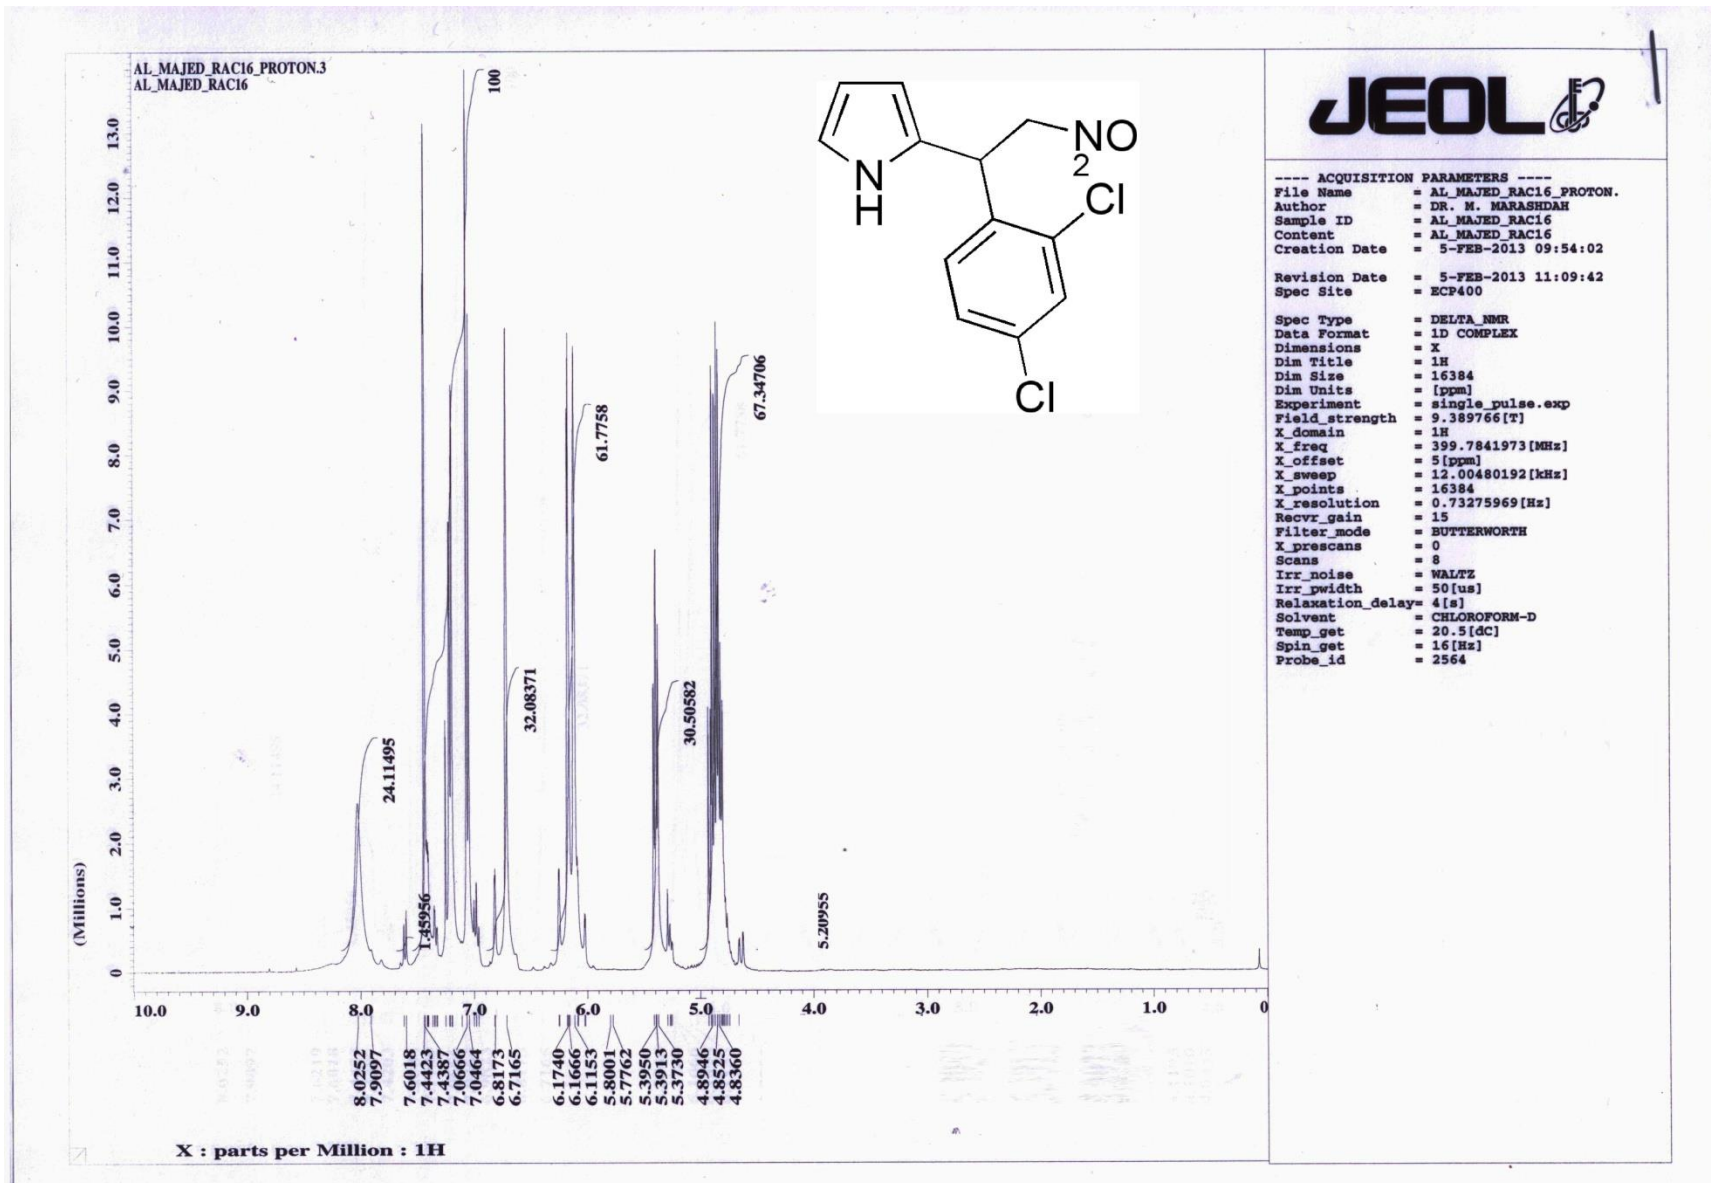



Compound 8g: <sup>13</sup>C-NMR

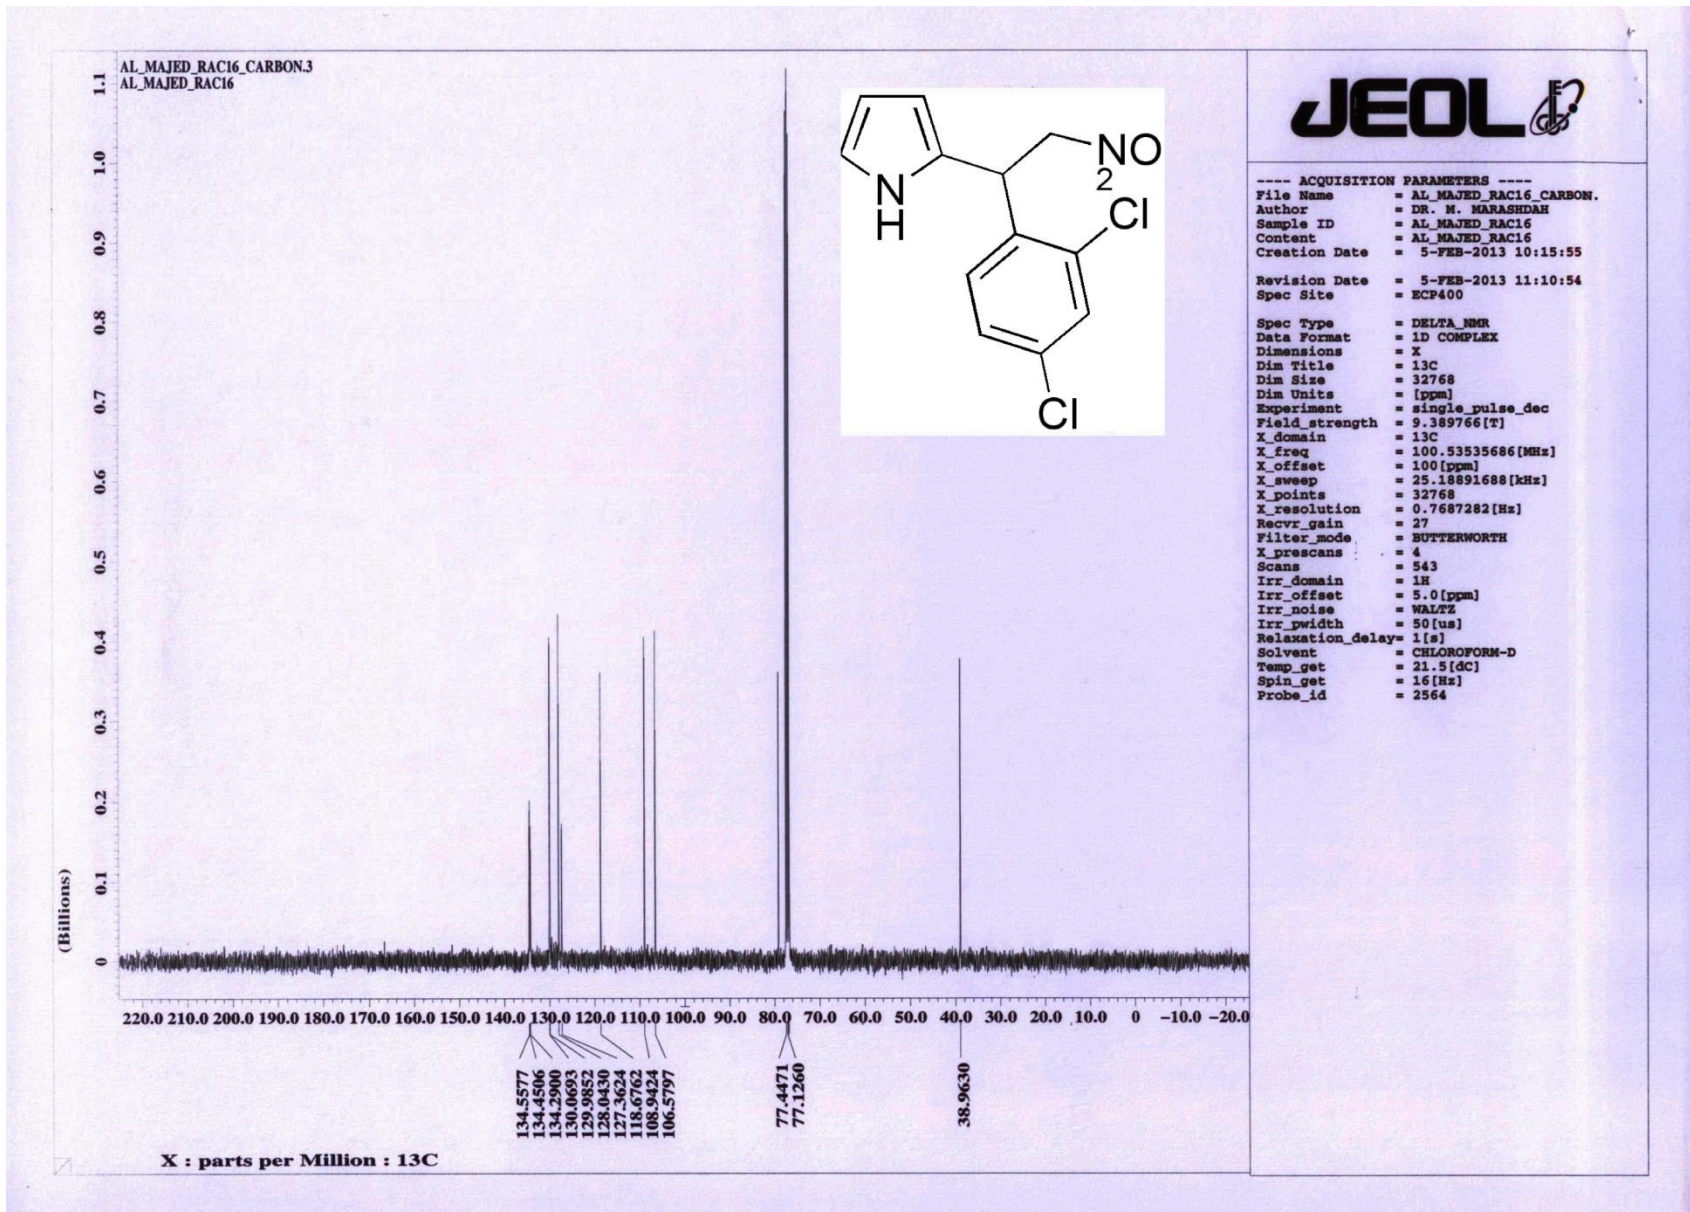

Compound 8h: <sup>1</sup>H-NMR

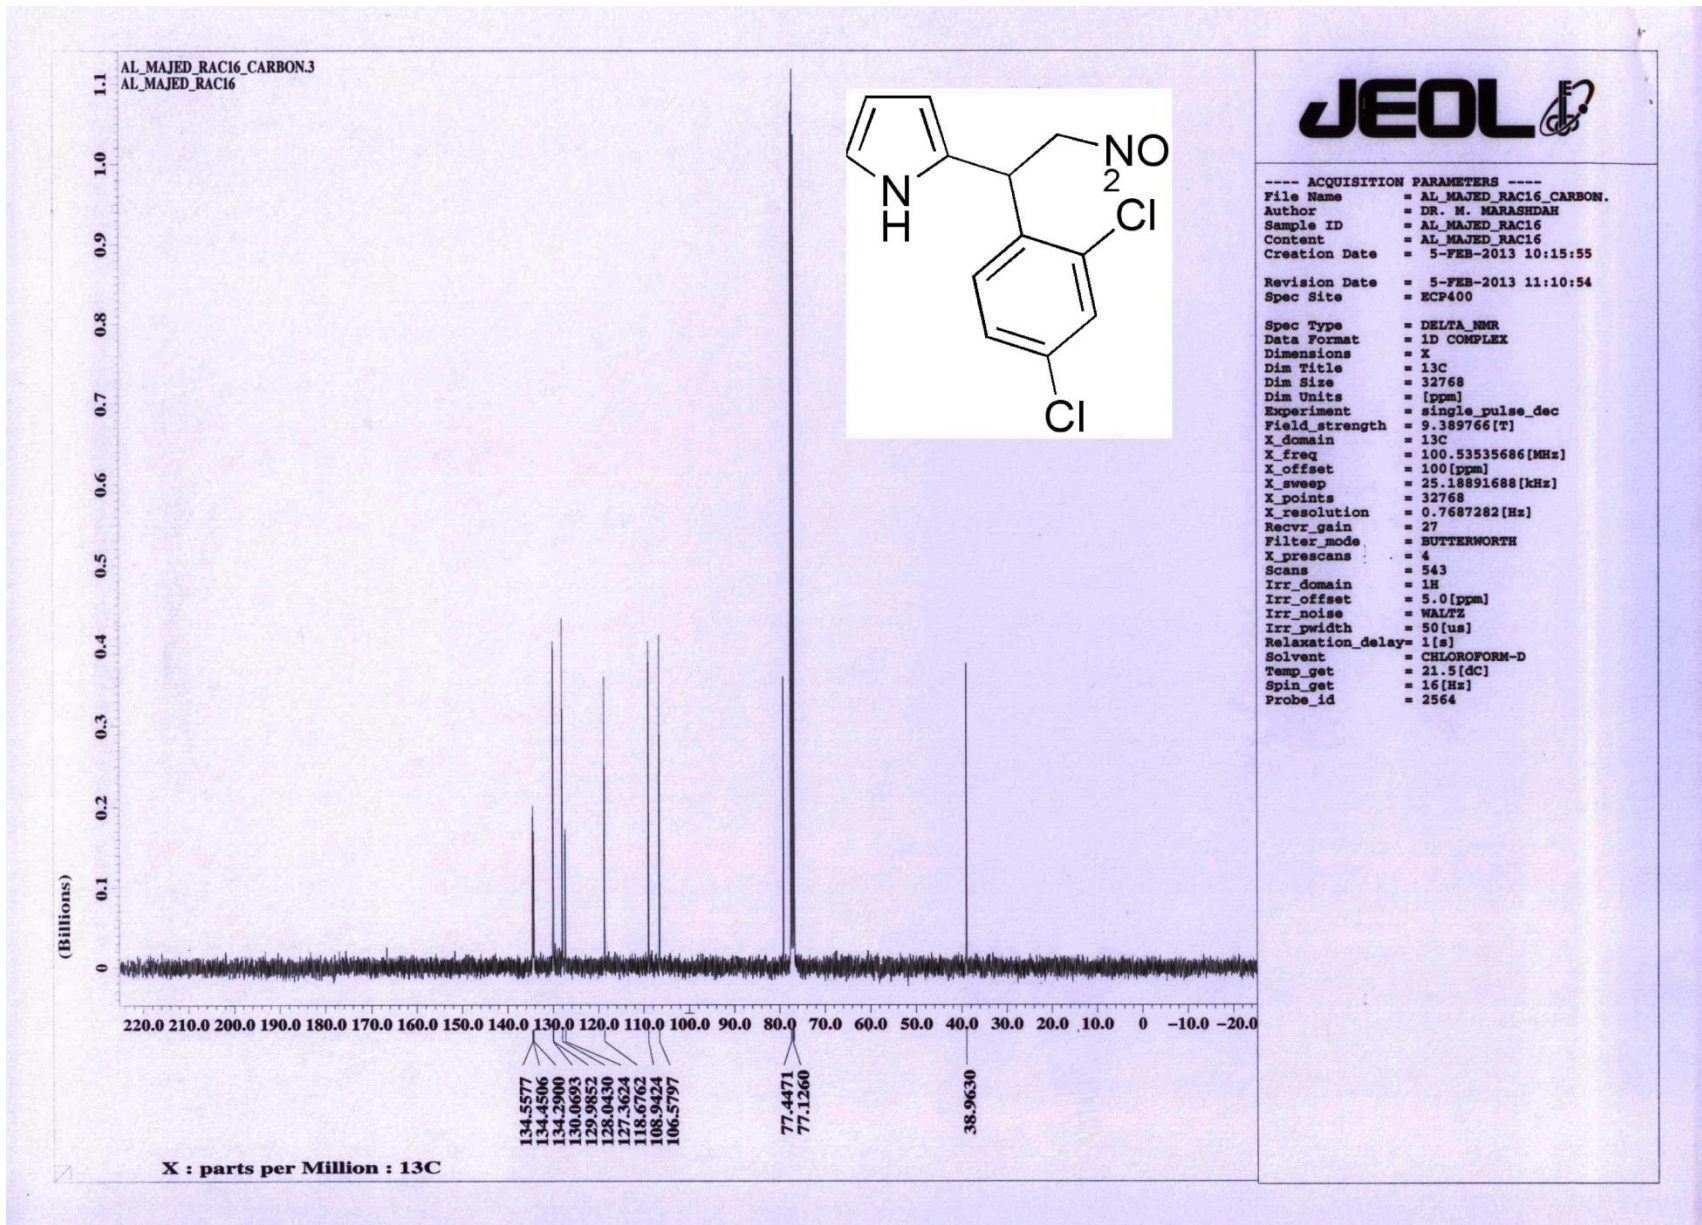

Compound 8h: <sup>13</sup>C-NMR

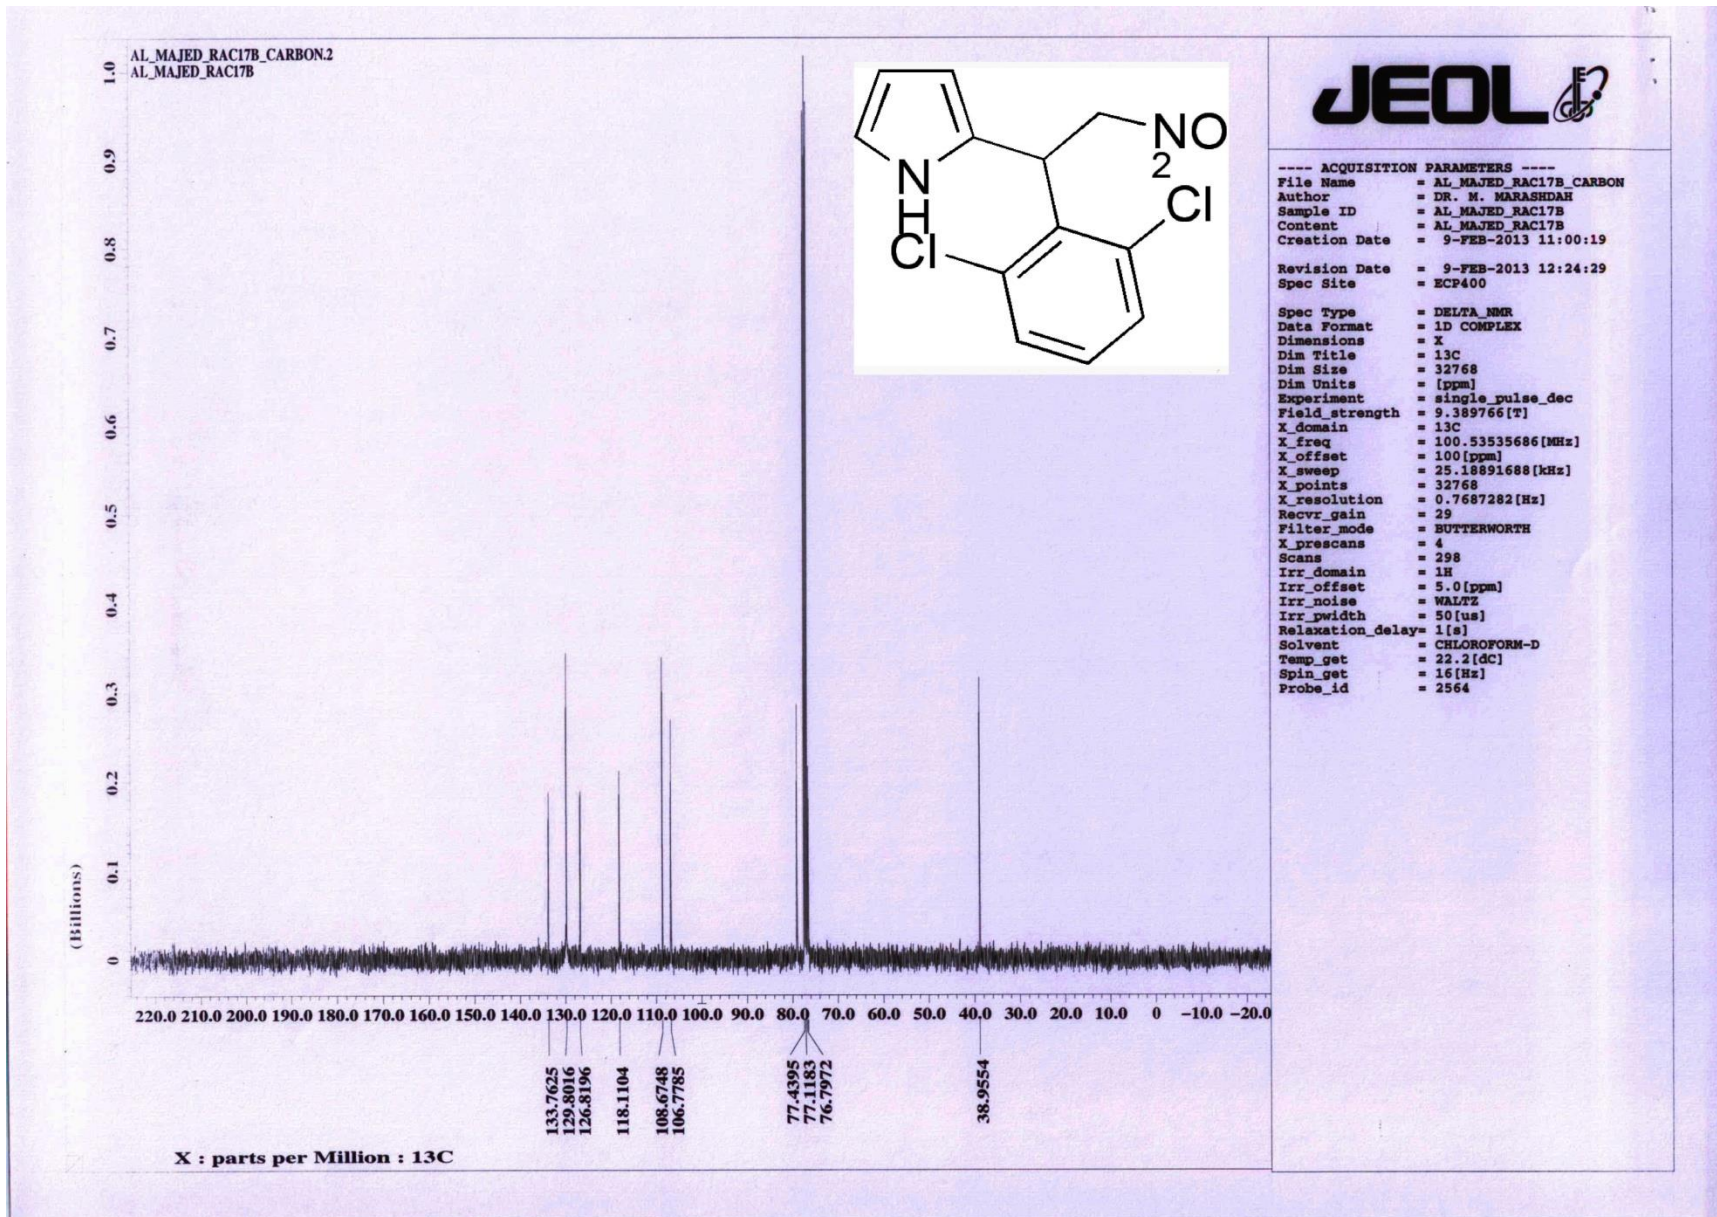

Compound 9h: <sup>1</sup>H-NMR

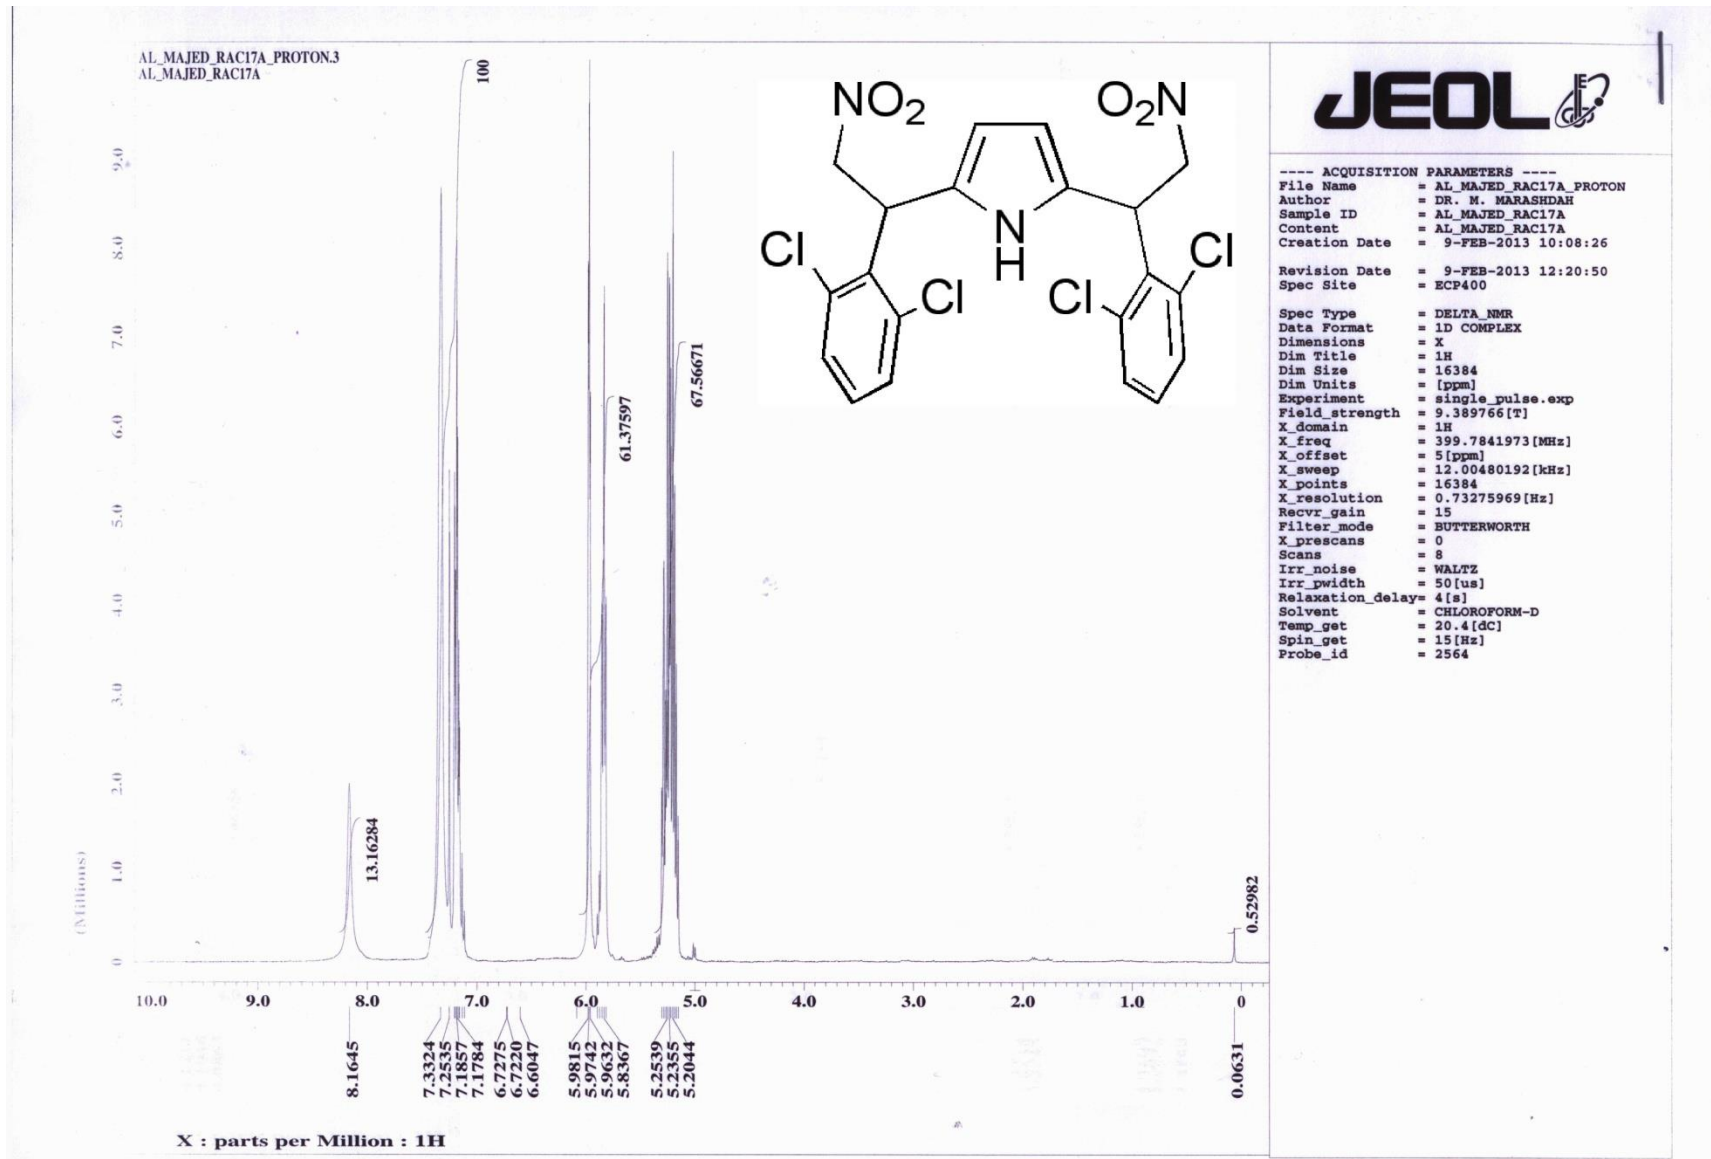

Compound 9h: <sup>13</sup>C-NMR

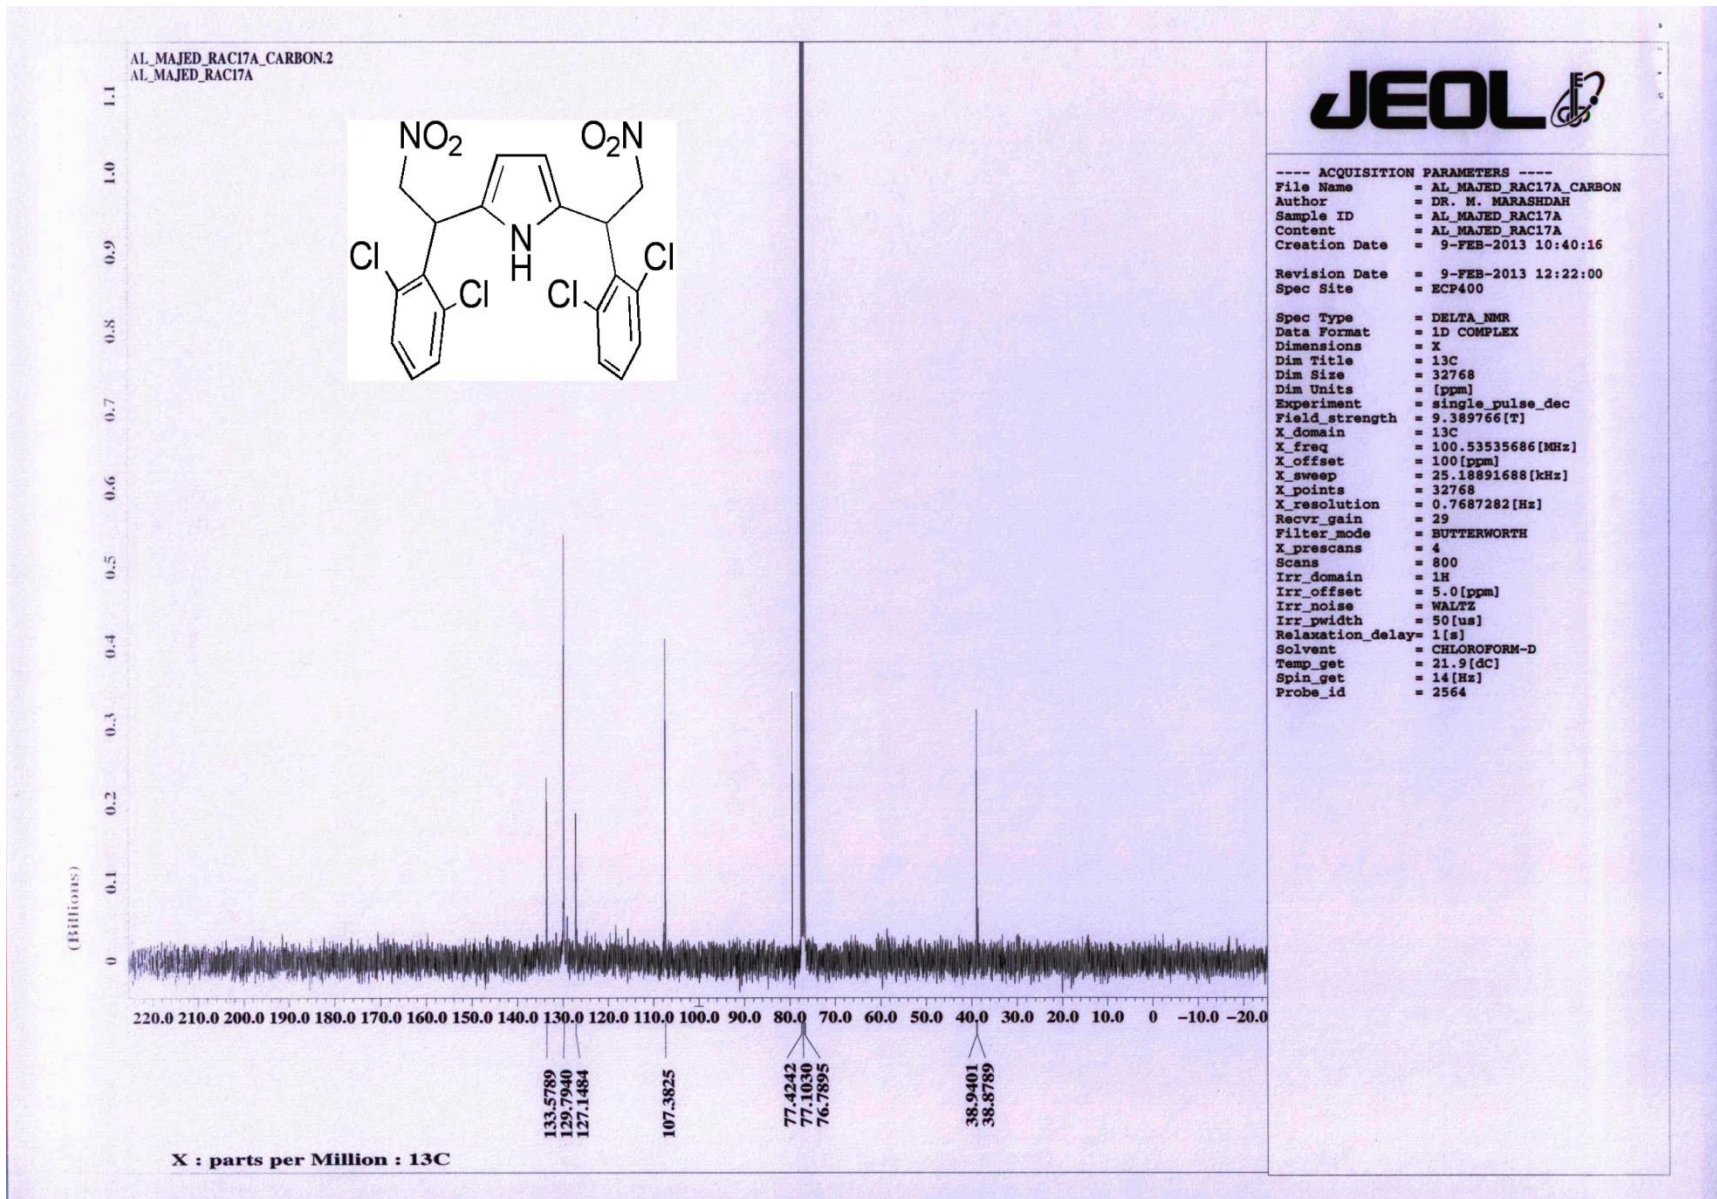

Compound 8i: <sup>1</sup>H-NMR

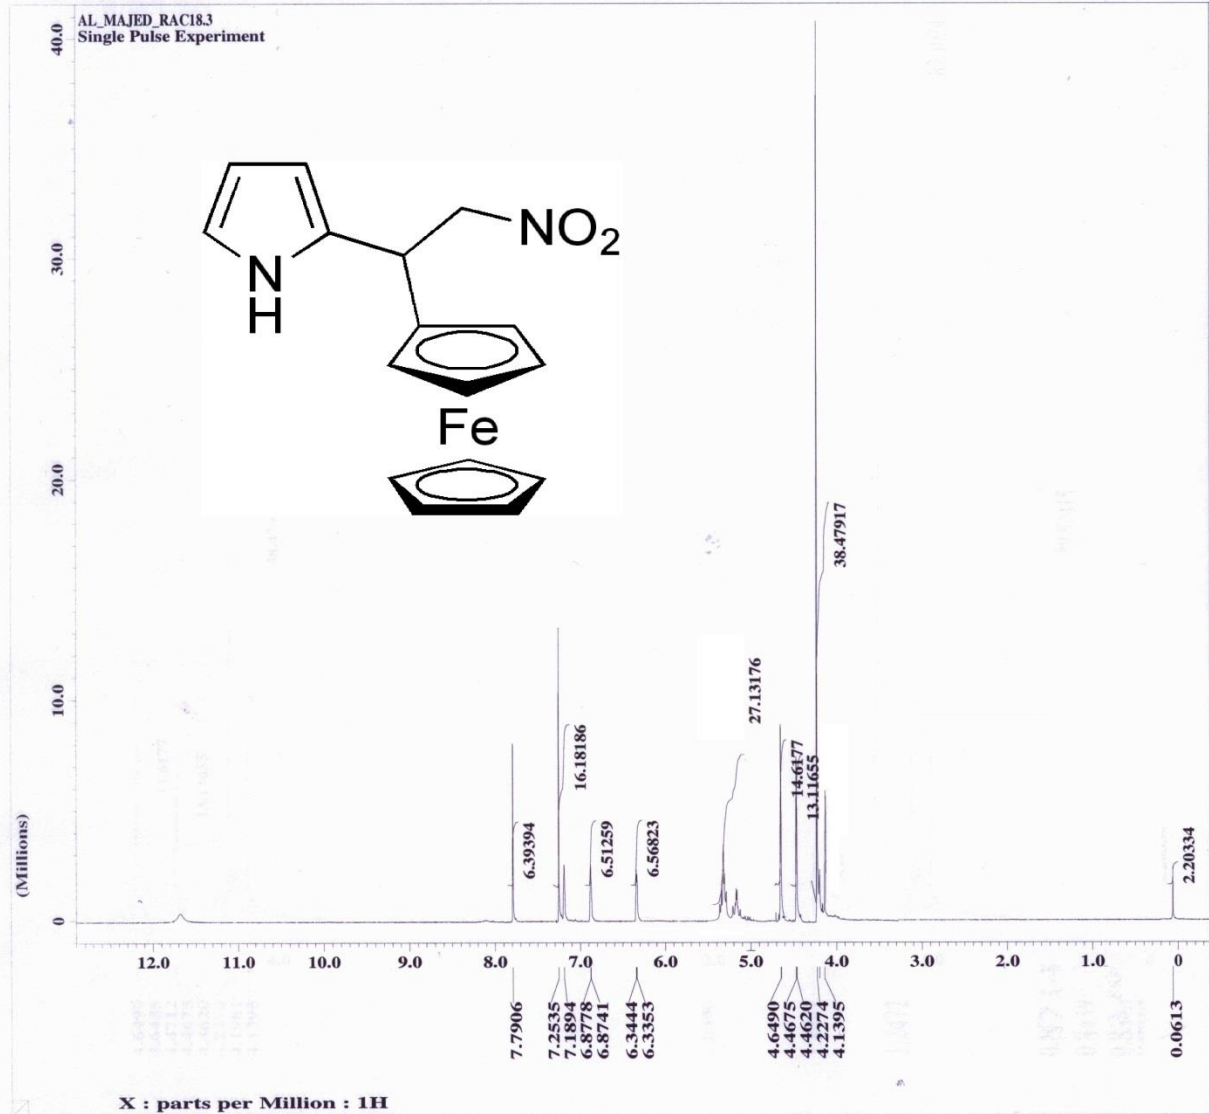

**JEOL**

---- ACQUISITION PARAMETERS ----

|                  |                          |
|------------------|--------------------------|
| File Name        | = AL_MAJED_RAC18.3       |
| Author           | = DR. M. MARASHDAH       |
| Sample ID        | = AL_MAJED_RAC18         |
| Content          | = Single Pulse Experimen |
| Creation Date    | = 6-FEB-2013 11:52:31    |
| Revision Date    | = 6-FEB-2013 12:25:35    |
| Spec Site        | = ECP400                 |
| Spec Type        | = DELTA_NMR              |
| Data Format      | = 1D COMPLEX             |
| Dimensions       | = X                      |
| Dim Title        | = 1H                     |
| Dim Size         | = 16384                  |
| Dim Units        | = [ppm]                  |
| Experiment       | = single_pulse.exp       |
| Field_strength   | = 9.389766[T]            |
| X_domain         | = 1H                     |
| X_freq           | = 399.7841973 [MHz]      |
| X_offset         | = 5 [ppm]                |
| X_sweep          | = 12.00480192 [kHz]      |
| X_points         | = 16384                  |
| X_resolution     | = 0.73275969 [Hz]        |
| Recvr_gain       | = 17                     |
| Filter_mode      | = BUTTERWORTH            |
| X_prescans       | = 0                      |
| Scans            | = 8                      |
| Irr_noise        | = WALTZ                  |
| Irr_pwidth       | = 50 [us]                |
| Relaxation_delay | = 4 [s]                  |
| Solvent          | = CHLOROFORM-D           |
| Temp_get         | = 20.5 [dC]              |
| Spin_get         | = 12 [Hz]                |
| Probe_id         | = 2564                   |

Compound 8i: <sup>13</sup>C-NMR

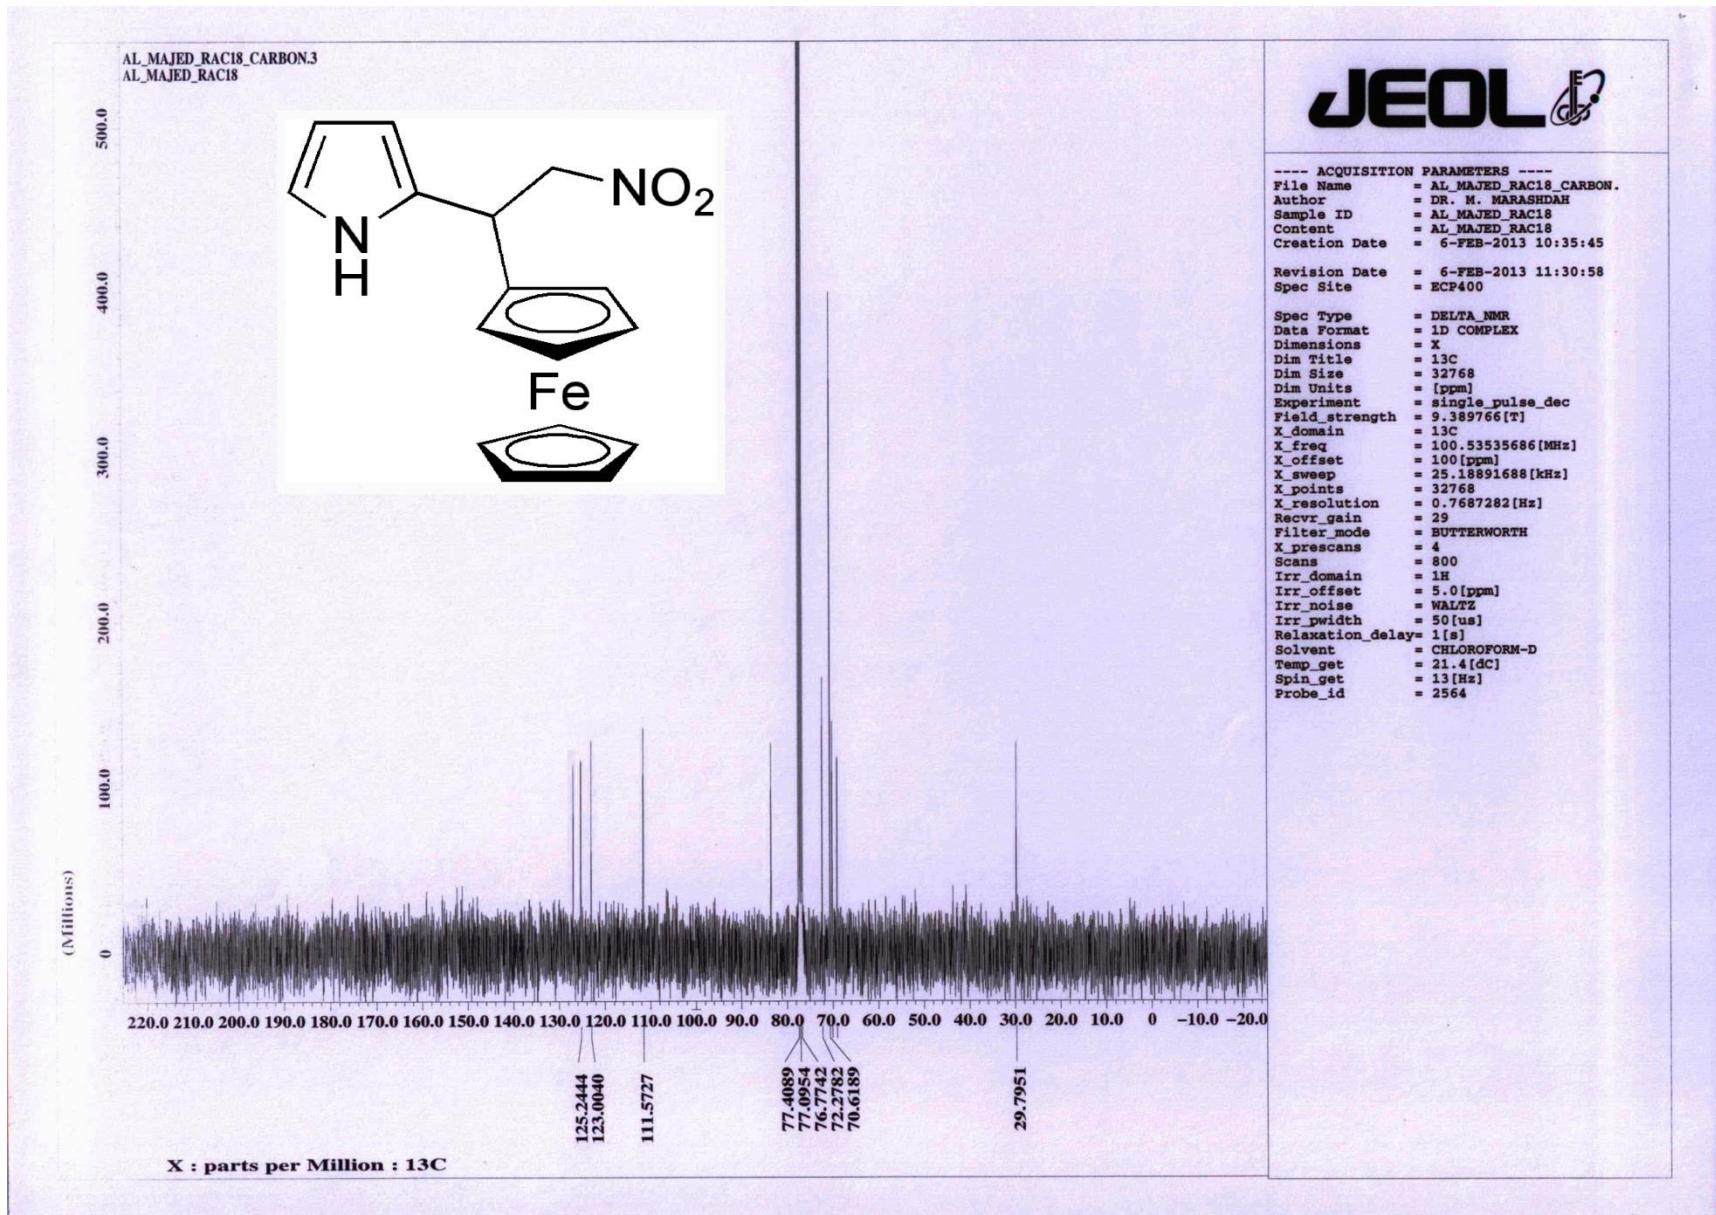

Supplement: f1 [file 649197.f1.pdf]
